# Supplementary material for: Structure–activity correlation in transfection promoted by pyridinium cationic lipids
Source: Royal Society of Chemistry journal article supplement (doi:10.1039/c6ob00041j), 2016-01-01

Supporting information to accompany:

## **Towards quantitative structure-activity correlation in transfection promoted by pyridinium cationic lipids**

P. Parvizi-Bahktar, J. Mendez-Campos, L. Raju, N.A. Khaliq, E. Jubeli, H. Larsen, D. Nicholson, M.D. Pungente and T.M. Fyles

### **Contents**

|                                                      |    |
|------------------------------------------------------|----|
| General procedures for synthesis .....               | 2  |
| Ester coupling: .....                                | 2  |
| Methylation reaction: .....                          | 6  |
| Alternate Synthesis of (18:1)(brC20:0) .....         | 9  |
| Lipid fractionation by ESI-MS .....                  | 10 |
| Biological Methods .....                             | 11 |
| Gel retardation assays .....                         | 13 |
| DNase I degradation assays .....                     | 18 |
| Transfection and cell viability bar charts .....     | 24 |
| Table S1: Particle sizing data .....                 | 31 |
| Table S2: SAXD data .....                            | 35 |
| Table S3: Transfection and cell viability data ..... | 36 |
| Table S4: calculated molecular parameters .....      | 39 |
| Table S5: $TI_{PVM}$ for experimental mixtures ..... | 40 |
| Proton and Carbon NMR spectra .....                  | 43 |

## General procedures for synthesis

Most chemicals and solvents were used as received from known suppliers, except THF and DMF which were dried and distilled before use. Compounds were purified by column chromatography using silica gel 60. NMR spectra were collected on a Bruker AC300 (300 MHz) or Bruker Avance (500 MHz) instrument. Proton ( $^1\text{H}$ ) chemical shifts are reported in part per million (ppm,  $\delta$  scale), referenced with residual proton shift of  $\text{CDCl}_3$  (7.26). The  $^1\text{H}$  NMR results are reported as shift, multiplicity (s = singlet, d = doublet, t = triplet, m = multiple, br = broad), integration and J value (Hz).  $^{13}\text{C}$  NMR are reported in part per million and are referenced to carbon resonance of  $\text{CDCl}_3$  (77.23). ESI-Mass spectra were recorded on a Waters MicroMass Q-TOF instrument running in positive ion mode. Elemental analysis was done at Canadian Microanalytical Service Ltd. Compounds diC12:0, diC14:0, diC16:0, diC18:0, and diC18:1 and their precursor pyridines are known (Pijper, D.; Bulten, E.; Smisterova, J.; Wagenaar, A.; Hoekstra, D.; Engberts, J.; Hulst, R. Novel biodegradable pyridinium amphiphiles for gene delivery *Eur. J. Org. Chem.* **2003**, 2003, 4406. doi: 10.1002/ejoc.200300361); spectroscopic characterization data are provided for completeness.

### Ester coupling:

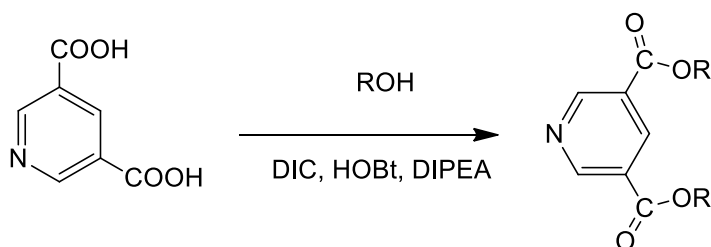

To a solution of 1 equivalent of 3,5-pyridinedicarboxylic acid in relation to 2.4 equivalent of the alcohol in THF were added 2.4 equivalents of *N,N*-diisopropyl carbodiimide (DIC), hydroxybenzotriazole (HOBt) and *N,N*-diisopropylethyl amine (DIPEA). The reaction was sealed under an atmosphere of  $\text{N}_2$ , and stirred for 24 h at rt. Once complete, the reaction was filtered to remove DIU, and diluted with dichloromethane (DCM). The organic phase was extracted with phosphate buffer (pH = 3) (twice), water (twice) 10% NaCl (twice) and rinsed with sat. NaCl (once), dried with anhydrous sodium sulfate, and concentrated under vacuum. The crude product was purified by column chromatography on silica gel, using a gradient of ether in hexanes as eluent.

### Synthesis of diC9:0 pyridine

Ester coupling conditions: 1 equivalent of 3,5-pyridinedicarboxylic acid (0.835 g, 5 mmol), 2.4 equivalents of DIC (1.514 g, 12 mmol), 2.4 equivalents of HOBt (1.620 g, 12 mmol), 2.4 equivalents of 1-nonaol (1.731 g, 12 mmol) and 2.4 equivalents of DIPEA (1.550 g, 12 mmol) were stirred in THF at rt for 24 h. Standard work-up and purification by silica gel chromatography, using 15% ether/hexanes as eluent, yields **2-10** as a white solid, 1.777 g (84%). NMR ( $\text{CDCl}_3$ )  $^1\text{H}$   $\delta$ : 9.35 (d,  $J=3$  Hz, 2H), 8.85 (t,  $J=6$  Hz, 1H), 4.38 (t,  $J=15$  Hz, 4H), 1.82 (m, 4H), 1.25 (m, 28 H), 0.88 (m, 6H).  $^{13}\text{C}$   $\delta$ : 164.4, 154.0, 137.8, 126.2, 65.9, 31.7, 29.5, 28.0, 25.9, 22.5, 14.1. MS (+ve ESI): calc'd for  $\text{C}_{25}\text{H}_{42}\text{NO}_4^+$  = 420.311 amu, obtained = 420.315 amu.

### Synthesis of diC11:0 pyridine

Ester coupling conditions: 1 equivalent of 3,5-pyridinedicarboxylic acid (0.835 g, 5 mmol), 2.4 equivalents of DIC (1.564 g, 12 mmol), 2.4 equivalents of HOBt (1.840 g, 12 mmol), 2.4 equivalents of 1-undecanol (2.068 g, 12 mmol) and 2.4 equivalents of DIPEA (1.854 g, 12 mmol) were stirred in THF at rt for 24 h. Standard work-up and purification by silica gel chromatography, using 15% ether/hexanes as eluent, yields **2-12** as a white solid, 1.235 g (51%). NMR (CDCl<sub>3</sub>) <sup>1</sup>H δ: 9.35 (d, J=3 Hz, 2H), 8.85 (t, J=6 Hz, 1H), 4.38 (t, J=15 Hz, 4H), 1.79 (m, 4H), 1.26 (m, 36H), 0.87 (br t, 6H). <sup>13</sup>C δ: 164.3, 154.50, 138.4, 126.6, 66.1, 31.8, 29.3, 28.5, 25.9, 22.6, 14.0. MS (+ve ESI): calc'd for C<sub>29</sub>H<sub>50</sub>NO<sub>4</sub><sup>+</sup> = 476.373 amu, obtained = 476.377 amu.

### Synthesis of diC12:0 pyridine

Ester coupling conditions: 1 equivalent of 3,5-pyridinedicarboxylic acid (0.835 g, 5 mmol), 2.4 equivalents of DIC (1.564 g, 12 mmol), 2.4 equivalents of HOBt (1.840 g, 12 mmol), 2.4 equivalents of 1-dodecanol (2.238 g, 12 mmol) and 2.4 equivalents of DIPEA (1.854 g, 12 mmol) were stirred in THF at rt for 24 h. Standard work-up and purification by silica gel chromatography, using 15% ether/hexanes as eluent, yields **2-14** as a white solid, 1.01 g (40%). NMR (CDCl<sub>3</sub>) <sup>1</sup>H δ: 9.36 (d, J=3 Hz, 2H), 8.85 (t, J=6 Hz, 1H), 4.39 (t, J=15 Hz, 4H), 1.80 (m, 4H), 1.27 (m, 36H), 0.88 (br t, 6H). <sup>13</sup>C δ: 164.5, 154.0, 137.9, 126.5, 65.9, 31.8, 29.3, 28.6, 25.9, 22.6, 14.0. MS (+ve ESI; low res): calc'd for C<sub>31</sub>H<sub>54</sub>NO<sub>4</sub><sup>+</sup> = 504.405 amu, obtained = 504.409 amu.

### Synthesis of diC14:0 pyridine

Ester coupling conditions: 1 equivalent of 3,5-pyridinedicarboxylic acid (0.835 g, 5 mmol), 2.4 equivalents of DIC (1.564 g, 12 mmol), 2.4 equivalents of HOBt (1.840 g, 12 mmol), 2.4 equivalents of 1-tetradecanol (2.5750 g, 12 mmol) and 2.4 equivalents of DIPEA (1.854 g, 12 mmol) were stirred in THF at rt for 24 h. Standard work-up and purification by silica gel chromatography, using 15% ether/hexanes as eluent, yields **2-16** as a white solid, 0.732 g (26%). NMR (CDCl<sub>3</sub>) <sup>1</sup>H δ: 9.36 (br s, 2H), 8.87 (t, J=3 Hz, 1H), 4.39 (t, J=15 Hz, 4H), 1.79 (m, 4H), 1.26 (m, 48H), 0.89 (br t, 6H). <sup>13</sup>C δ: 164.5, 154.0, 137.9, 126.3, 65.9, 31.8, 29.4, 28.6, 25.9, 22.6, 14.0. MS (+ve ESI; low res): calc'd for C<sub>35</sub>H<sub>62</sub>NO<sub>4</sub><sup>+</sup> = 560.4 amu, obtained = 560.4 amu.

### Synthesis of diC18:0 pyridine

Ester coupling conditions: 1 equivalent of 3,5-pyridinedicarboxylic acid (0.835 g, 5 mmol), 2.4 equivalents of DIC (1.564 g, 12 mmol), 2.4 equivalents of HOBt (1.840 g, 12 mmol), 2.4 equivalents of 1-octadecanol (3.245 g, 12 mmol) and 2.4 equivalents of DIPEA (1.854 g, 12 mmol) were stirred in THF at rt for 24 h. Standard work-up and purification by silica gel chromatography, using 15% ether/hexanes as eluent, yields **2-18** as a white solid, 1.09 g (32%). NMR (CDCl<sub>3</sub>) <sup>1</sup>H δ: 9.34 (br s, 2H), 8.83 (t, J=3 Hz, 1H), 4.36 (t, J=12 Hz, 4H), 1.78 (m, 4H), 1.23 (m, 64H), 0.89 (br t, 6H). <sup>13</sup>C δ: 164.5, 154.0, 137.9, 126.3, 65.9, 31.9, 29.4, 28.6, 25.9, 22.6, 14.0. MS (+ve ESI; low res): calc'd for C<sub>43</sub>H<sub>78</sub>NO<sub>4</sub><sup>+</sup> = 672.5 amu, obtained = 672.4 amu.

### Synthesis of diC20:0 pyridine

Ester coupling conditions: 1 equivalent of 3,5-pyridinedicarboxylic acid (0.334 g, 1.2 mmol), 2.4 equivalents of DIC (0.363 g, 2.88 mmol), 2.4 equivalents of HOBt (0.735 g, 2.88 mmol), 2.4 equivalents of 1-eicosanol (0.373 g, 2.88 mmol) and 2.4 equivalents of DIPEA (1.854 g, 2.88 mmol) were stirred in THF at rt for 24 h. Standard work-up and purification by silica gel chromatography, using 15% ether/hexanes as eluent, yields **2-20** as a white solid, 0.308 g (35%). NMR (CDCl<sub>3</sub>) <sup>1</sup>H δ: 9.36 (d, J=3 Hz, 2H), 8.85 (t, J=6 Hz, 1H), 4.38 (t, J=12 Hz, 4H), 1.80 (m, 4H), 1.26 (m, 72 H), 0.88 (br t, 6H). <sup>13</sup>C δ: 164.5, 154.0, 137.9, 126.3, 65.9, 31.9, 29.4, 28.6, 25.9, 22.6, 14.0. MS (+ve ESI): calc'd for C<sub>47</sub>H<sub>86</sub>NO<sub>4</sub><sup>+</sup> = 728.655 amu, obtained = 728.359 amu.

### Synthesis of diisoC9:0 pyridine

Ester coupling conditions: 1 equivalent of 3,5-pyridinedicarboxylic acid (0.835 g, 5 mmol), 2.4 equivalents of DIC (1.564 g, 12 mmol), 2.4 equivalents of HOBt (1.840 g, 12 mmol), 2.4 equivalents of 3,5,5-trimethylhexan-1-ol (1.731 g, 12 mmol) and 2.4 equivalents of DIPEA (1.854 g, 12 mmol) were stirred in THF at rt for 24 h. Standard work-up and purification by silica gel chromatography, using 15% ether/hexanes as eluent, yields **2-22** as a colorless oil, 1.233 g (58%). NMR (CDCl<sub>3</sub>) <sup>1</sup>H δ: 9.34 (d, J=3 Hz, 2H), 8.83 (t, J=3 Hz, 1H), 4.41 (t, J=15 Hz, 4H), 1.83 (m, 6H), 0.90-1.63 (m, 30H). <sup>13</sup>C δ: 164.4, 154.0, 137.8, 126.2, 64.3, 50.9, 37.7, 31.0, 29.3, 27.2, 26.2, 22.5. MS (+ve ESI): calc'd for C<sub>25</sub>H<sub>42</sub>NO<sub>4</sub><sup>+</sup> = 420.311 amu, obtained = 420.286 amu.

### Synthesis of dibrC20:0 pyridine

Ester coupling conditions: 1 equivalent of 3,5-pyridinedicarboxylic acid (0.835 g, 5 mmol), 2.4 equivalents of DIC (1.564 g, 12 mmol), 2.4 equivalents of HOBt (1.840 g, 12 mmol), 2.4 equivalents of nonadecan-9-ol (3.583 g, 12 mmol) and 2.4 equivalents of DIPEA (1.854 g, 12 mmol) were stirred in THF at rt for 24 h. Standard work-up and purification by silica gel chromatography, using 15% ether/hexanes as eluent, yields **2-24** as a colorless oil, 2.144 (67%). NMR (CDCl<sub>3</sub>) <sup>1</sup>H δ: 9.35 (d, J=3 Hz, 2H), 8.84 (t, J=3 Hz, 1H), 4.28 (d, J=6 Hz, 4H), 1.80 (m, 2H), 1.27 (m, 64H), 0.87 (br t, 12H). <sup>13</sup>C δ: 164.5, 154.0, 137.8, 126.3, 68.5, 37.4, 31.8, 31.3, 29.5, 26.7, 22.6, 14.0. MS (+ve ESI): calc'd for C<sub>47</sub>H<sub>86</sub>NO<sub>4</sub><sup>+</sup> = 728.655 amu, obtained = 728.660 amu.

### Synthesis of diC18:1 pyridine

Ester coupling conditions: 1 equivalent of 3,5-pyridinedicarboxylic acid (0.835 g, 5 mmol), 2.4 equivalents of DIC (1.564 g, 12 mmol), 2.4 equivalents of HOBt (1.840g, 12 mmol), 2.4 equivalents of oleyl alcohol (3.220 g, 12 mmol) and 2.4 equivalents of DIPEA (1.854 g, 12 mmol) were stirred in THF at rt for 24 h. Standard work-up and purification by silica gel chromatography, using 15% ether/hexanes as eluent, yields **2-26** as a colorless oil, 0.537g (16%). NMR (CDCl<sub>3</sub>) <sup>1</sup>H δ: 9.35 (d, J=3 Hz, 2H), 8.85 (t, J=6 Hz, 1H, 6), 5.36 (m, 4H), 4.38 (t, J=12 Hz, 4H), 2.00 (m, 8H), 1.79 (m, 4H), 1.27 (m, 48H), 0.90 (br t, 6H). <sup>13</sup>C δ: 164.5, 154.0, 137.9, 129.9, 129.7, 126.3, 65.9, 32.5, 31.8, 29.3, 28.6, 27.1, 25.9, 22.6, 14.0. MS (+ve ESI; low res): calc'd for C<sub>47</sub>H<sub>74</sub>NO<sub>4</sub><sup>+</sup> = 668.5 amu, obtained = 668.4 amu.

### Synthesis of diC11:1 pyridine

Ester coupling conditions: 1 equivalent of 3,5-pyridinedicarboxylic acid (0.835 g, 5 mmol), 2.4 equivalents of DIC (1.564 g, 12 mmol), 2.4 equivalents of HOBt (1.840 g, 12 mmol), 2.4 equivalents of 10-undecen-1-ol (2.043 g, 12 mmol) and 2.4 equivalents of DIPEA (1.854 g, 12 mmol) were stirred in THF at rt for 24 h. Standard work-up and purification by silica gel chromatography, using 15% ether/hexanes as eluent, yields **2-28** as a colorless oil, 1.069 g (45%). NMR (CDCl<sub>3</sub>) <sup>1</sup>H δ: 9.36 (d, J=3 Hz, 2H), 8.85 (t, J=6 Hz, 1H), 5.76 (m, 2H), 4.97 (m, 4H), 4.38 (t, J=15 Hz, 4H), 2.03 (m, 4H), 1.82 (m, 4H), 1.31 (m, 28 H). <sup>13</sup>C δ: 164.5, 154.0, 139.1, 137.9, 128.3, 114.1, 65.9, 33.7, 29.4, 29.3, 29.2, 29.0, 28.8, 28.5, 25.9. MS (+ve ESI): calc'd for C<sub>29</sub>H<sub>46</sub>NO<sub>4</sub><sup>+</sup> = 472.342 amu, obtained = 472.346 amu.

### Synthesis of (C16:0)(C11:1) pyridine

Ester coupling conditions: 1 equivalent of 3,5-pyridinedicarboxylic acid (0.835 g, 5 mmol), 2.4 equivalents of DIC (1.564 g, 12 mmol), 2.4 equivalents of HOBt (1.840 g, 12 mmol), undecen-1-ol (1.022 g, 6 mmol), 1.2 equivalents of 1-hexadecanol (1.4593 g, 6 mmol) and 2.4 equivalents of DIPEA (1.854 g, 12 mmol) were stirred in THF at rt for 24 h. Standard work-up and purification by silica gel chromatography, using 15% ether/hexanes as eluent, yields 1.0395 g of white solid which was later determined via ESI mass spectroscopy of methylated analogues to contain 22% of **2-4**, 28% of **2-28** and 50% of **4-1**. NMR (CDCl<sub>3</sub>) <sup>1</sup>H δ: 9.35 (d, J=3 Hz, 2H), 8.84 (t, J=6 Hz, 1H), 5.79 (m, 1H), 4.95 (m, 2H), 4.37 (t, J=15 Hz, 4H), 2.00 (m, 2H), 1.79 (m, 4H), 1.27 (m, 38H), 0.87 (br t, 3H). <sup>13</sup>C δ: 164.5, 149.2, 154.0, 139.1, 137.9, 126.3, 114.1, 65.9, 33.7, 31.8, 29.3, 28.8, 25.9, 22.9, 14.0. MS (+ve ESI; low res): calc'd for (2-4) C<sub>39</sub>H<sub>70</sub>NO<sub>4</sub><sup>+</sup> = 616.5 amu, obtained = 616.7 amu. calc'd for (2.28) C<sub>29</sub>H<sub>46</sub>NO<sub>4</sub><sup>+</sup> = 472.3 amu, obtained = 472.5 amu, calc'd for (4-1) C<sub>34</sub>H<sub>58</sub>NO<sub>4</sub><sup>+</sup> = 544.8 amu, obtained = 544.8 amu.

### Methylation reaction:

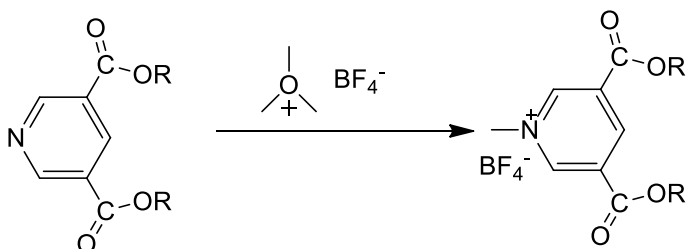

To a solution of 1 equivalent of pyridine in DCM, 1 equivalent of trimethyloxoniumtetrafluoroborate was added and stirred at room temperature overnight. Then it was concentrated in vacuum to give the tetrafluoroborate salt of compound in quantitative yield.

### Synthesis of diC9:0

Methylation conditions: To a solution of *diC9:0 pyridine* (100 mg, 0.238 mmol) in DCM, trimethyloxoniumtetrafluoroborate (0.0352 g, 0.238 mmol) was added and the mixture was stirred at room temperature overnight. Concentration in vacuum gave white solid in quantitative yield. NMR (CDCl<sub>3</sub>) <sup>1</sup>H δ: 9.37 (m, 3H), 4.62 (s, J=15 Hz, 3H), 4.43 (t, 4H), 1.80 (m, 4H), 1.27 (br s, 28H), 0.87 (br t, 6H). <sup>13</sup>C δ: 160.5, 149.3, 144.3, 131.1, 67.4, 49.9, 33.8, 29.4, 28.4, 25.7, 22.6, 14.0. MS (+ve ESI): calc'd for C<sub>26</sub>H<sub>44</sub>NO<sub>4</sub><sup>+</sup> = 434.326 amu, obtained = 434.330 amu.

### Synthesis of diC11:0

Methylation conditions: To a solution of *diC11:0 pyridine* (100 mg, 0.210 mmol) in DCM, trimethyloxoniumtetrafluoroborate (0.0311 g, 0.210 mmol) was added and the mixture was stirred at room temperature overnight. Concentration in vacuum gave white solid in quantitative yield. NMR (CDCl<sub>3</sub>) <sup>1</sup>H δ: 9.37 (m, 3H), 4.68 (s, 3H), 4.51 (t, J=15 Hz, 4H), 1.80 (m, 4H), 1.27 (br s, 36H), 0.87 (br t, 6H). <sup>13</sup>C δ: 160.8, 149.5, 147.7, 144.6, 131.3, 67.7, 50.2, 29.5, 28.5, 25.9, 22.6, 14.0. MS (+ve ESI): calc'd for C<sub>30</sub>H<sub>52</sub>NO<sub>4</sub><sup>+</sup> = 490.389 amu, obtained = 490.393 amu.

### Synthesis of diC12:0

Methylation conditions: To a solution of *diC12:0 pyridine* (200 mg, 0.398 mmol) in DCM, trimethyloxoniumtetrafluoroborate (0.0587 g, 0.398 mmol) was added and the mixture was stirred at room temperature overnight. Concentration in vacuum gave white solid in quantitative yield. NMR (CDCl<sub>3</sub>) <sup>1</sup>H δ: 9.29 (m, 3H), 4.64 (s, 3H), 4.43 (t, J=12 Hz, 4H), 1.81 (m, 4H), 1.26 (br s, 36H), 0.88 (br t, 6H). <sup>13</sup>C δ: 160.3, 149.2, 144.7, 131.4, 67.9, 50.1, 31.8, 29.6, 28.3, 25.7, 22.6, 14.0. MS (+ve ESI; low res): calc'd for C<sub>32</sub>H<sub>56</sub>NO<sub>4</sub><sup>+</sup> = 518.4 amu, obtained = 518.6 amu.

### Synthesis of diC14:0

Methylation conditions: To a solution of *diC14:0 pyridine* (200 mg, 0.358 mmol) in DCM, trimethyloxoniumtetrafluoroborate (0.0529 g, 0.358 mmol) was added and the mixture was stirred at room temperature overnight. Concentration in vacuum gave white solid in quantitative yield. NMR (CDCl<sub>3</sub>) <sup>1</sup>H δ: 9.34 (m, 3H), 4.87 (s, 3H), 4.45 (t, J=15 Hz, 4H), 1.83 (m, 4H), 1.27 (br s, 48H), 0.89 (br t, 6H). <sup>13</sup>C δ: 160.4, 149.2, 144.6, 131.3, 67.8, 50.0, 31.9, 29.6, 28.3, 25.7, 22.6, 14.0. MS (+ve ESI; low res): calc'd for C<sub>36</sub>H<sub>64</sub>NO<sub>4</sub><sup>+</sup> = 574.4 amu, obtained = 574.4 amu.

### Synthesis of diC18:0

Methylation conditions: To a solution of *diC18:0 pyridine* (100 mg, 0.149 mmol) in DCM, trimethyloxoniumtetrafluoroborate (0.0220 g, 0.149 mmol) was added and the mixture was stirred at room temperature overnight. Concentration in vacuum gave white solid in quantitative yield. NMR (CDCl<sub>3</sub>) <sup>1</sup>H δ: 9.38 (m, 3H), 4.63 (s, 3H), 4.42 (t, 4H), 1.80 (m, 4H), 1.27 (br s, 64H), 0.88 (br t, 6H). <sup>13</sup>C δ: 160.5, 149.3, 144.4, 131.2, 67.7, 49.9, 31.9, 29.3, 28.4, 25.7, 22.6, 14.0. MS (+ve ESI; low res): calc'd for C<sub>44</sub>H<sub>80</sub>NO<sub>4</sub><sup>+</sup> = 686.6 amu, obtained = 686.5 amu.

### Synthesis of diC20:0

Methylation conditions: To a solution of *diC20:0 pyridine* (100 mg, 0.134 mmol) in DCM, trimethyloxoniumtetrafluoroborate (0.0199 g, 0.134 mmol) was added and the mixture was stirred at room temperature overnight. Concentration in vacuum gave white solid in quantitative yield. NMR (CDCl<sub>3</sub>) <sup>1</sup>H δ: 9.39 (m, 3H), 4.64 (s, 3H), 4.43 (t, J=15 Hz, 4H), 1.82 (m, 4H), 1.26 (br s, 72H), 0.88 (br t, 6H). <sup>13</sup>C δ: 160.4, 149.2, 144.4, 131.3, 67.8, 49.8, 31.9, 29.3, 28.3, 25.7, 22.6, 14.0. MS (+ve ESI): calc'd for C<sub>48</sub>H<sub>88</sub>NO<sub>4</sub><sup>+</sup> = 742.671 amu, obtained = 742.675 amu.

### Synthesis of diisoC9:0

Methylation conditions: To a solution of *diisoC9:0 pyridine* (100 mg, 0.238 mmol) in DCM, trimethyloxoniumtetrafluoroborate (0.0353 g, 0.238 mmol) was added and the mixture was stirred at room temperature overnight. Concentration in vacuum gave colorless oil in quantitative yield. NMR (CDCl<sub>3</sub>) <sup>1</sup>H δ: 9.37 (m, 3H), 4.61 (s, 3H), 4.44 (t, J=12 Hz, 4H), 1.83 (m, 6H), 1.0-1.30 (m, 30H). <sup>13</sup>C δ: 160.6, 149.3, 144.1, 131.1, 66.3, 50.9, 49.9, 37.3, 31.0, 29.3, 26.3, 22.4. MS (+ve ESI): calc'd for C<sub>26</sub>H<sub>44</sub>NO<sub>4</sub><sup>+</sup> = 434.326 amu, obtained = 434.329 amu.

### Synthesis of dibrC20:0

Methylation conditions: To a solution of *dibrC20:0 pyridine* (200 mg, 0.247 mmol) in DCM, trimethyloxoniumtetrafluoroborate (0.0406 g, 0.247 mmol) was added and the mixture was stirred at room temperature overnight. Concentration in vacuum gave colorless oil in quantitative yield. NMR (CDCl<sub>3</sub>) <sup>1</sup>H δ: 9.37 (m, 3H), 4.68 (s, 3H), 4.36 (d, J=6 Hz, 4H), 1.84 (m, 2H), 1.26 (br s, 64H), 0.87 (br t, 12H). <sup>13</sup>C δ: 160.5, 149.3, 144.2, 147.4, 131.2, 129.9, 70.0, 50.3, 37.3, 31.8, 31.2, 29.5, 26.6, 22.4, 14.0. MS (+ve ESI): calc'd for C<sub>48</sub>H<sub>88</sub>NO<sub>4</sub><sup>+</sup> = 742.671 amu, obtained = 742.675 amu.

### Synthesis of diC18:1

Methylation conditions: To a solution of *diC18:1 pyridine* (124 mg, 0.185 mmol) in DCM, trimethyloxoniumtetrafluoroborate (0.0274 g, 0.185 mmol) was added and the mixture was stirred at room temperature overnight. Concentration in vacuum gave colorless oil in quantitative yield. NMR (CDCl<sub>3</sub>) <sup>1</sup>H δ: 9.42 (m, 3H), 5.34 (m, 4H), 4.62 (s, 3H), 4.42 (t, J=12 Hz, 4H), 2.00 (m, 8H), 1.80 (m, 4H), 1.30 (br s, 48H), 0.87 (br t, 6H). <sup>13</sup>C δ: 160.5, 149.3, 144.4, 131.2, 129.9, 129.7, 126.3, 67.4, 49.9, 32.5, 31.8, 29.2, 28.4, 27.2, 26.7, 25.7, 22.6, 14.0. MS (+ve ESI; low res): calc'd for C<sub>44</sub>H<sub>76</sub>NO<sub>4</sub><sup>+</sup> = 682.5 amu, obtained = 682.4 amu.

### Synthesis of diC11:1

Methylation conditions: To a solution of *diC11:1 pyridine* (217 mg, 0.460 mmol) in DCM, trimethyloxoniumtetrafluoroborate (0.0680 g, 0.460 mmol) was added and the mixture was stirred at room temperature overnight. Concentration in vacuum gave colorless oil in quantitative yield. NMR (CDCl<sub>3</sub>) <sup>1</sup>H δ: 9.39 (m, 3H), 5.80 (m, 2H), 4.94 (m, 4H), 4.65 (s, 3H), 4.41 (t, J=12 Hz, 4H), 2.03 (m, 4H), 1.81 (m, 4H), 1.30 (m, 28H). <sup>13</sup>C δ: 160.7, 149.5, 144.7, 139.4, 131.5, 114.3, 67.6, 50.2, 34.0, 29.3, 28.5, 28.5, 25.9. MS (+ve ESI): calc'd for C<sub>30</sub>H<sub>48</sub>NO<sub>4</sub><sup>+</sup> = 486.358 amu, obtained = 486.362 amu.

### Synthesis of (C16:0)(C11:1)

Methylation conditions: To a solution of *(C16:0)(C11:1) pyridine* (200 mg, 0.367 mmol) in DCM, trimethyloxoniumtetrafluoroborate (0.0543 g, 0.367 mmol) was added and the mixture was stirred at room temperature overnight. Concentration in vacuum gave colorless oil in quantitative yield which was later determined via ESI mass spectroscopy method of methylated analogues to contain 22% of **2-5**, 28% of **2-29** and 50% of **4-2**. NMR (CDCl<sub>3</sub>) <sup>1</sup>H δ: 9.39 (m, 3H), 5.80 (m, 2H), 4.94 (m, 4H), 4.66 (s, 3H), 4.42 (t, J=15 Hz, 4H), 2.00 (m, 4H), 1.79 (m, 4H), 1.27 (m, 38H), 0.88 (br t, 1.5H). <sup>13</sup>C δ: 164.4, 149.2, 139.1, 131.4, 114.1, 67.8, 50.0, 33.7, 31.9, 29.3, 28.8, 25.7, 22.6, 14.0. MS (+ve ESI; low res): calc'd for (**2-5**) C<sub>40</sub>H<sub>72</sub>NO<sub>4</sub><sup>+</sup> = 630.55 amu, obtained = 630.47 amu. calc'd for (**2.29**) C<sub>30</sub>H<sub>48</sub>NO<sub>4</sub><sup>+</sup> = 486.3 amu, obtained = 486.3 amu, calc'd for (**4-2**) C<sub>35</sub>H<sub>60</sub>NO<sub>4</sub><sup>+</sup> = 558.4 amu, obtained = 558.4 amu.

### Synthesis of (C18:1)(brC20:0)

Methylation conditions: To a solution of *(C18:1)(brC20:0) pyridine* (200 mg, 0.286 mmol) in DCM, trimethyloxoniumtetrafluoroborate (0.0424 g, 0.286 mmol) was added and the mixture was stirred at room temperature overnight. Concentration in vacuum gave colorless oil in quantitative yield which was determined via ESI mass spectroscopy method to contain 28% of **2-25**, 16% of **2-27** and 56% of **4-4**. NMR (CDCl<sub>3</sub>) <sup>1</sup>H δ: 9.35 (m, 3H), 5.35 (m, 2H), 4.68 (s, 3H), 4.42 (m, 4H), 3.49 (m, 0H, exp. 2H), 2.00 (m, 8H), 1.27 (m, 67H), 0.88 (br t, 10 H). <sup>13</sup>C δ: 160.5, 149.2, 144.1, 131.2, 129.9, 129.7, 126.3, 70.4, 58.5, 50.1, 37.2, 31.0, 29.3, 27.2, 26.7, 22.6, 14.0. MS (+ve ESI; low res): calc'd for (**2-25**) C<sub>48</sub>H<sub>88</sub>NO<sub>4</sub><sup>+</sup> = 742.6 amu, obtained = 742.6 amu, calc'd for (**2.27**) C<sub>44</sub>H<sub>76</sub>NO<sub>4</sub><sup>+</sup> = 682.5 amu, obtained = 682.4 amu, calc'd for (**4-4**) C<sub>46</sub>H<sub>82</sub>NO<sub>4</sub><sup>+</sup> = 712.6 amu, obtained = 712.3 amu.



### Alternate Synthesis of (18:1)(brC20:0)

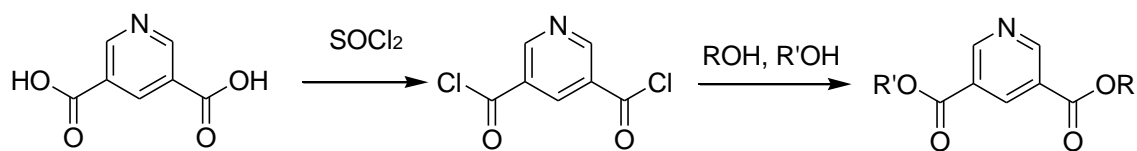

R=oleyl

**4-3**

R=R'=oleyl **2-26**

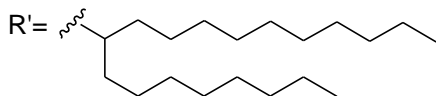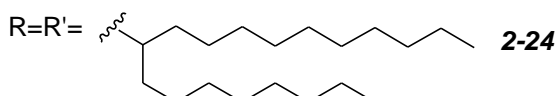

To 1 equivalent of 3,5-pyridinedicarboxylic acid (0.835 g, 5 mmol) (Scheme above), thionyl chloride (8.4 g, 70 mmol) was added. The solution was reflux for 24 h under N<sub>2</sub> to yield pyridine-3,5-dicarbonyl dichloride. The residual thionyl chloride was removed under reduced pressure and then the remaining product was dissolved in DCM (20 mL). 1.2 equivalent of nonadecan-9-ol (1.791 g, 6 mmol) and 1.2 equivalents of oleyl alcohol (1.610 g, 6 mmol) were added and the reaction solution was refluxed for 3 h. The solvent was removed under reduced pressure and then the residue was dissolved in ether (50 mL) and washed with 4M NaOH, dried over sodium sulphate and the crude product was purified by silica gel chromatography, using 15% ether/hexanes as eluent, yields 3.099 g of colorless oil which was determined via ESI mass spectroscopy method of the methylated product to contain 28% of **2-24**, 16% of **2-26** and 56% of **4-3**. NMR (CDCl<sub>3</sub>) <sup>1</sup>H δ: 9.34 (d, 2H, 3), 8.83 (t, J=3 Hz, 1H), 5.34 (m, 4H), 4.36 (t, J=18 Hz, 4H), 2.00 (m, 8H), 1.82 (m, 4H), 1.25 (m, 52H), 0.86 (br t, 9H). <sup>13</sup>C: δ 164.5, 154.0, 139.3, 137.9, 126.3, 114.1, 65.9, 33.7, 31.8, 29.6, 28.8, 28.6, 25.9, 22.6, 14.0. MS (+ve ESI): calc'd for (**2-24**) C<sub>47</sub>H<sub>86</sub>NO<sub>4</sub><sup>+</sup> = 728.65 amu, obtained = 728.53 amu, calc'd for (**2-26**) C<sub>47</sub>H<sub>74</sub>NO<sub>4</sub><sup>+</sup> = 668.55 amu, obtained = 668.42 amu, calc'd for (**4-3**) C<sub>45</sub>H<sub>80</sub>NO<sub>4</sub><sup>+</sup> = 698.6 amu, obtained = 698.7 amu.

## Lipid fractionation by ESI-MS

This experiment investigates the potential fractionation of EPC/**dibrC20:0** binary mixtures during lipid hydration relative to EPC/**diC16:0** binary mixtures. A solution of DOPE/EPC/pyridinium lipid in a 2/1.5/1.5 mole ratio and total lipid concentration of 2mM in CHCl<sub>3</sub> was prepared as well as a reference solution of tetrabutyl ammonium tribromide (CHCl<sub>3</sub> 2mM). An aliquot of the lipid mixture and the reference (10 μL each) was diluted to 1 mL in MeOH. ESI-MS (ESI+) gave spectra that showed strong ions for the parent cationic lipids (EPC, m/z 706.5; **diC16:0**, m/z 630.5; **dibrC20:0**, m/z 742.5) and the standard (m/z 242.1). The ion intensity of each peak in the mixture was measured relative to the ion intensity of the tetrabutylammonium reference to give a relative response factor for each species. The stock solution was evaporated to form a thin layer of lipids and the layer was hydrated to a final concentration of 2 mM in lipid using water as occurs in the first stage of liposome formation. After sonication of this solution, a 10μL aliquot plus a known amount of reference was analysed as previously. Fractionation was observed as a change in the apparent response factor of the different species. The data is tabulated below using the convention that the amount of pyridinium lipid detected in the chloroform stock solution = 100.

| <b>Compound</b>                          | <b>%EPC</b> | <b>%diC16:0</b>   |
|------------------------------------------|-------------|-------------------|
| <b>diC16:0</b> stock CHCl <sub>3</sub>   | 64          | 100               |
| <b>diC16:0</b> water dispersion          | 49          | 14                |
|                                          | <b>%EPC</b> | <b>%dibrC20:0</b> |
| <b>dibrC20:0</b> stock CHCl <sub>3</sub> | 67          | 100               |
| <b>dibrC20:0</b> water dispersion        | 35          | 0.06              |

## Biological Methods

Cationic lipids included the synthetic pyridinium lipids and commercial lipid 1,2-dimyristoyl-sn-glycero-3-ethylphosphocholine (EPC). The co-lipids used for the formulation of liposomes and lipoplexes were 1,2-dioleoyl-sn-glycero-3-phosphoethanolamine (DOPE) and cholesterol. As neutral lipids, the concentrations of DOPE and cholesterol were not included in the final calculation of charge ratios when forming lipoplexes between cationic lipids and DNA.

### Preparation of lipid ethanolic stock solutions

Stock solutions of pyridinium lipids, commercial cationic lipid EPC and co-lipids DOPE and cholesterol were made by dissolving a known amount of each lipid in dichloromethane in a round-bottom flask. The solutions were placed on a rotary evaporator for 1 h to obtain a film. The film was dissolved in a known amount of anhydrous EtOH in order to achieve a 1 mM stock, and subsequently stored at  $-80^{\circ}\text{C}$ .

### Liposome formulations

An overall 3:2 molar ratio of total cationic lipid (synthetic lipid combined 1:1 with EPC, or control lipid EPC alone) to co-lipid, DOPE or cholesterol, in ethanolic solutions were prepared separately and evaporated under reduced pressure to generate thin films. The lipid films were hydrated with a known amount of sterile water to give 2 mM final hydrated stock solutions, which were stored overnight at  $4^{\circ}\text{C}$ . Before use, the hydrated stocks were warmed to  $37^{\circ}\text{C}$  and sonicated for 30 min.

### Preparation of Lipoplexes (lipid/pDNA complexes)

Lipoplexes of concentrations 0.081 mM, 0.243 mM, 0.486 mM, 0.81 mM and 1.62 mM, corresponding to the N/P (+/-) molar charge ratios of 0.5:1, 1.5:1, 3:1, 5.0:1 and 10.0:1, respectively, were prepared from the 2 mM liposome stocks. OPTI-MEM buffer (57.6  $\mu\text{L}$ ) and pDNA (14.4  $\mu\text{L}$ ; 250 ng/ $\mu\text{L}$ ) in Elution solution, were first combined, followed by the addition of an equal volume of corresponding liposome (72  $\mu\text{L}$ ) to this and mixed. These lipoplex formulations were incubated at rt for 30 min. 48  $\mu\text{L}$  of lipoplex formulation was used for the gel assays and to each of the remaining lipoplex formulations, 204  $\mu\text{L}$  of OPTI-MEM was added prior to use for transfection experiments. The Lipofectamine 2000/DNA control was prepared as per manufacturer's protocol.

### Liposome and lipoplex sizing

The hydrodynamic diameter,  $d_{\text{H}}$ , of liposomes and lipoplexes was measured by dynamic light scattering (DLS) at  $25^{\circ}\text{C}$  with a detection angle of  $90^{\circ}$ . All data are the mean  $\pm$  standard deviation (SD) of three measurements.

### Gel retardation assays of lipoplexes

To 20  $\mu\text{L}$  of the lipoplexes, 2  $\mu\text{L}$  of the gel loading dye (6X) was added and mixed by pipetting. Eighteen microliters of each sample was then loaded onto a 1% agarose gel impregnated with ethidium bromide and run at 105 V for 1 h in 1x TBE buffer. The migration of pDNA complexed with the cationic lipids was impeded in the electric field. The pDNA bands were observed using a Geliance transilluminator.

### **DNase I degradation assays of lipoplexes**

Twenty microliters of the lipoplexes was incubated with DNase I (1  $\mu$ L) at 37 °C for 1 h. After incubation, 5% SDS (4  $\mu$ L) was added and incubated for a further 30 min, followed by 2  $\mu$ L of gel loading dye (6x). Eighteen microliters of each sample was then loaded onto a 1% agarose gel impregnated with ethidium bromide and run at 105 V for 1 h in 1x TBE buffer. The *p*DNA bands were observed using a Geliance transilluminator.

### **Cell culture**

CHO-K1 cells were grown in RPMI media supplemented with 10% fetal calf serum and 100 U/mL of penicillin/streptomycin and 0.25  $\mu$ g/mL amphotericin B. Cells were seeded 48 h before transfection onto opaque and transparent 96-well plate at a density of  $10^4$  cells per well and incubated at 37 °C in presence of 5% CO<sub>2</sub> atmosphere. Cells were grown to 80% confluence before being washed with 1x PBS and incubated with 45  $\mu$ L of each lipid-*p*DNA complex in triplicate for 4 h at 37 °C in the presence of 5% CO<sub>2</sub> atmosphere. Complexes were then removed and the cells washed with 1x PBS before adding 100  $\mu$ L of complete RPMI media. Cells were left to incubate for an additional 44 h. Following the incubation, transfection and cytotoxicity assays were performed according to the below mentioned protocols.

### **$\beta$ -galactosidase assay**

Forty-eight hours after the application of lipoplexes,  $\beta$ -galactosidase activity was determined using a Beta-Glo<sup>®</sup> Assay System (Promega). Treated cells in the opaque 96-well plate were washed with 1x PBS, then 50  $\mu$ L of DMEM (phenol red-free media) was added to each well. This was followed by the addition of 50  $\mu$ L of Beta-Glo<sup>™</sup> working solution, prepared according to the manufacturer's directions (Promega), to each well and thorough mixing by pipetting. After 1 h incubation at rt, luminescence was then read on a Victor Envision high throughput plate reader.  $\beta$ -Galactosidase activity was expressed as relative light units produced by the luminescence of luciferin, which was normalized for protein content.

### **Total protein (BCA) assay**

Total protein content was measured using Pierce<sup>®</sup> BCA Protein Assay (Pierce Biotechnology, Rockford, IL). Forty-eight hours after the application of lipoplexes, treated cells in the transparent 96-well plate were washed with 1x PBS, and 10  $\mu$ L of passive lysis buffer (Promega) was added to each well. Plates were incubated at rt for 30 min. BCA working reagent (200  $\mu$ L), prepared according to the manufacturer's directions, was then added to each well, gently mixed by pipetting, and incubated at rt for 1 h prior to reading at 562 nm on a Victor Envision plate reader. A calibration curve obtained from a bovine serum albumin standard solution was used to determine cellular protein content per well.

### **Cytotoxicity assay**

The cytotoxicity associated with the lipoplex formulations at N:P (+/-) molar charge ratios ranging from 0.5:1 to 10:1 was evaluated using the MTS (3-(4,5-dimethylthiazol-2-yl)-5-(3-carboxymethoxyphenyl)-2-(4-sulfophenyl)-2H-tetrazolium) assay. Forty-eight hours after the application of lipoplexes, CHO-K1 cells in the transparent 96-well plates were washed with 1x PBS, 50  $\mu$ L of DMEM (phenol red-free media) followed by 10  $\mu$ L of CellTiter96<sup>®</sup> Aqueous One Solution Cell Proliferation Assay (Promega) was added to each well and mixed by gentle rocking. The plates were incubated further for 1 h at 37 °C. The absorbance of converted dye, which correlates with the number of viable cells, was measured at 492 nm using a Victor Envision high throughput plate reader. The percentage of viable cells was calculated as the absorbance ratio of treated to untreated cells.

## Gel retardation assays

Assays related to experiments labelled Exp1 and Exp4 in Tables S1-S5 were previously reported: Parvizi, P.; Jubeli, E.; Raju, L.; Khalique, N. A.; Almeer, A.; Allam, H.; Manaa, M. A.; Larsen, H.; Nicholson, D.; Pungente, M. D.; Fyles, T. M. Aspects of nonviral gene therapy: Correlation of molecular parameters with lipoplex structure and transfection efficacy in pyridinium-based cationic lipids *Int. J. Pharm.* **2014**, *461*, 145. doi: <http://dx.doi.org/10.1016/j.ijpharm.2013.11.045>

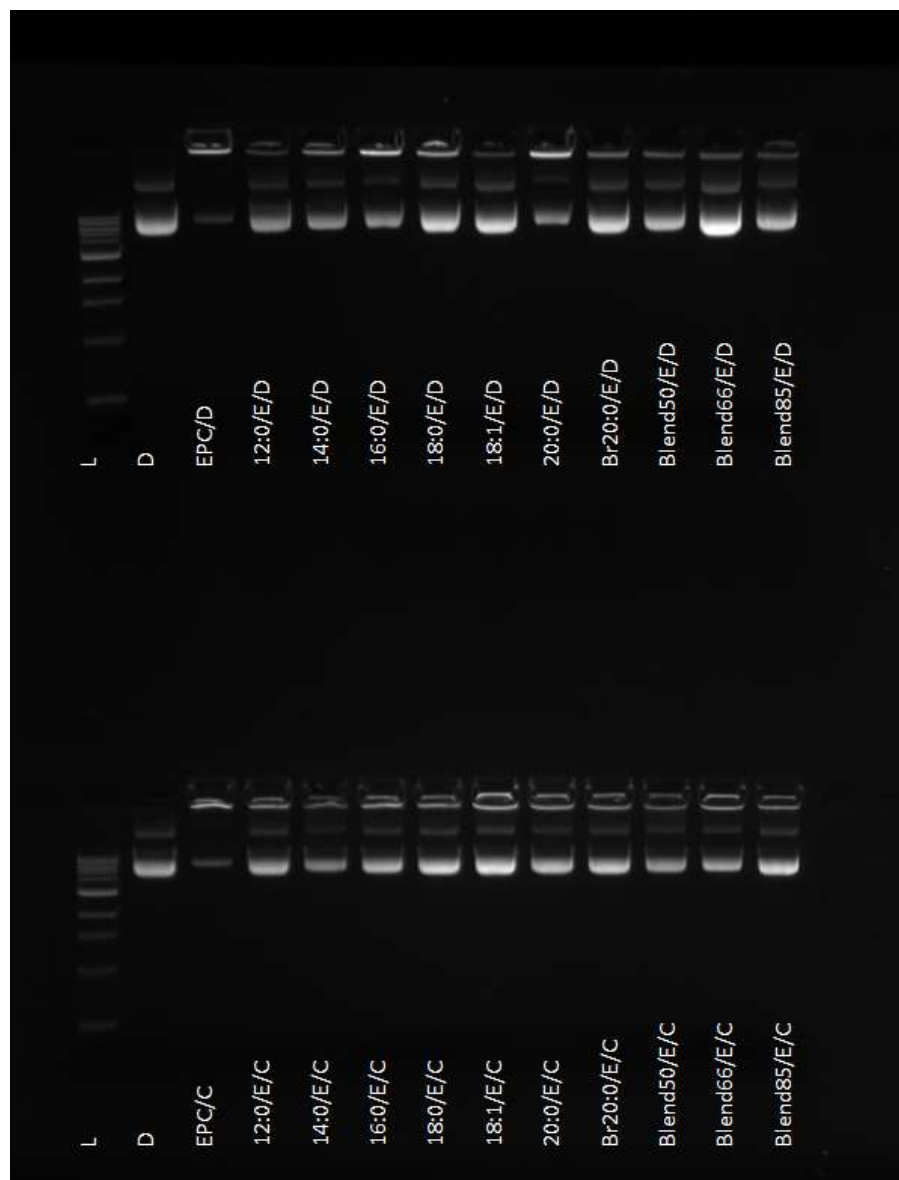

Figure S1 -Gel retardation assay of lipids diC12:0 to diC20:0 co-formulated with commercial lipid EPC (E) and neutral co-lipid DOPE (D) or cholesterol (C) at molar charge ratios 3, and run through a 1% agarose gel impregnated with the pDNA gel stain, ethidium bromide. Lanes  $\lambda$  and DNA denote the 1 kb DNA ladder and pDNA, respectively. Data from the experiment labelled Exp7 in Tables S1-S5.

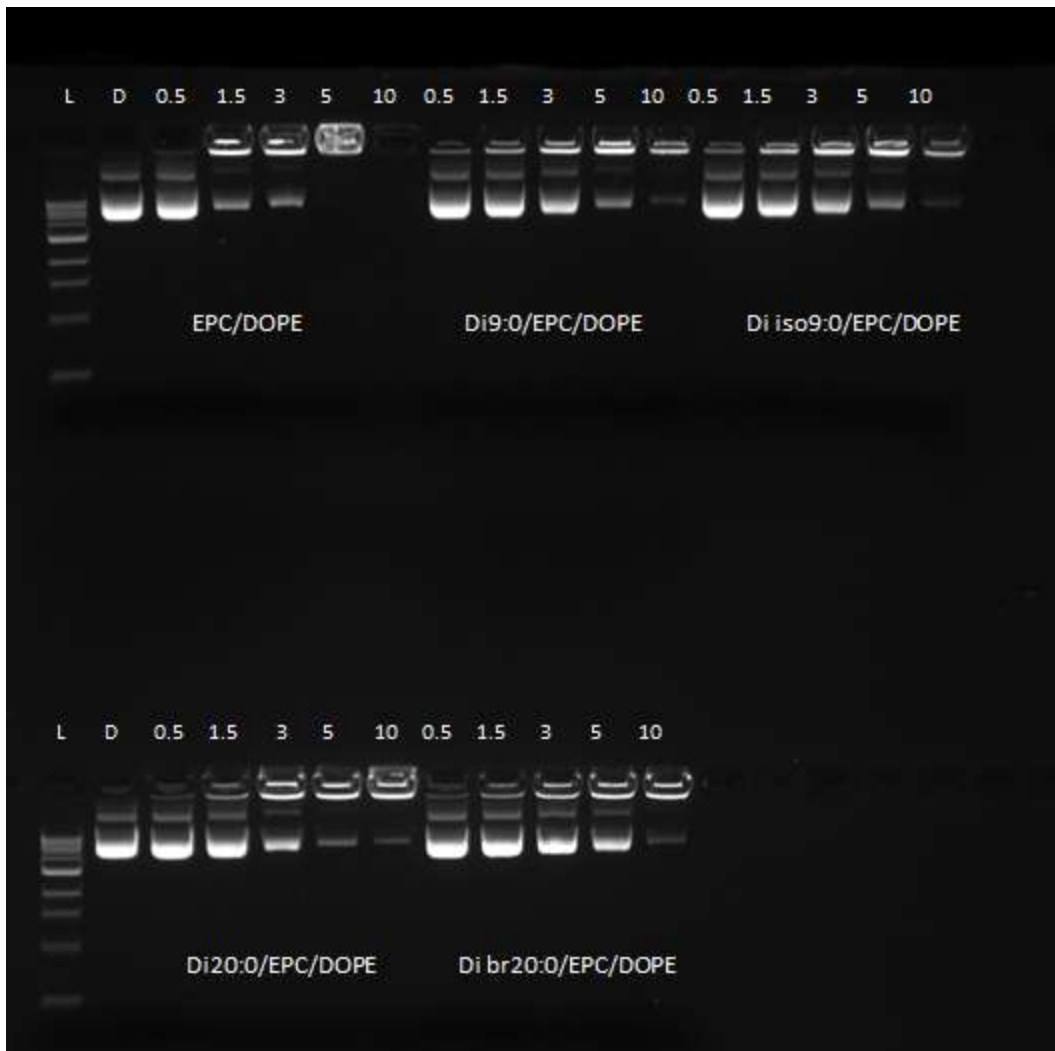

Figure S2 - Gel retardation assay of lipids diC9:0, diCisoC9:0, diC20:0 or di brC20:0 co-formulated with commercial lipid EPC and neutral co-lipid DOPE at charge ratios 0.5, 1.5, 3, 5 and 10 and run through a 1% agarose gel impregnated with the pDNA gel stain, ethidium bromide. Lanes  $\lambda$  and DNA denote the 1 kb DNA ladder and pDNA, respectively. Data from the experiment labelled Exp8 in Tables S1-S5.

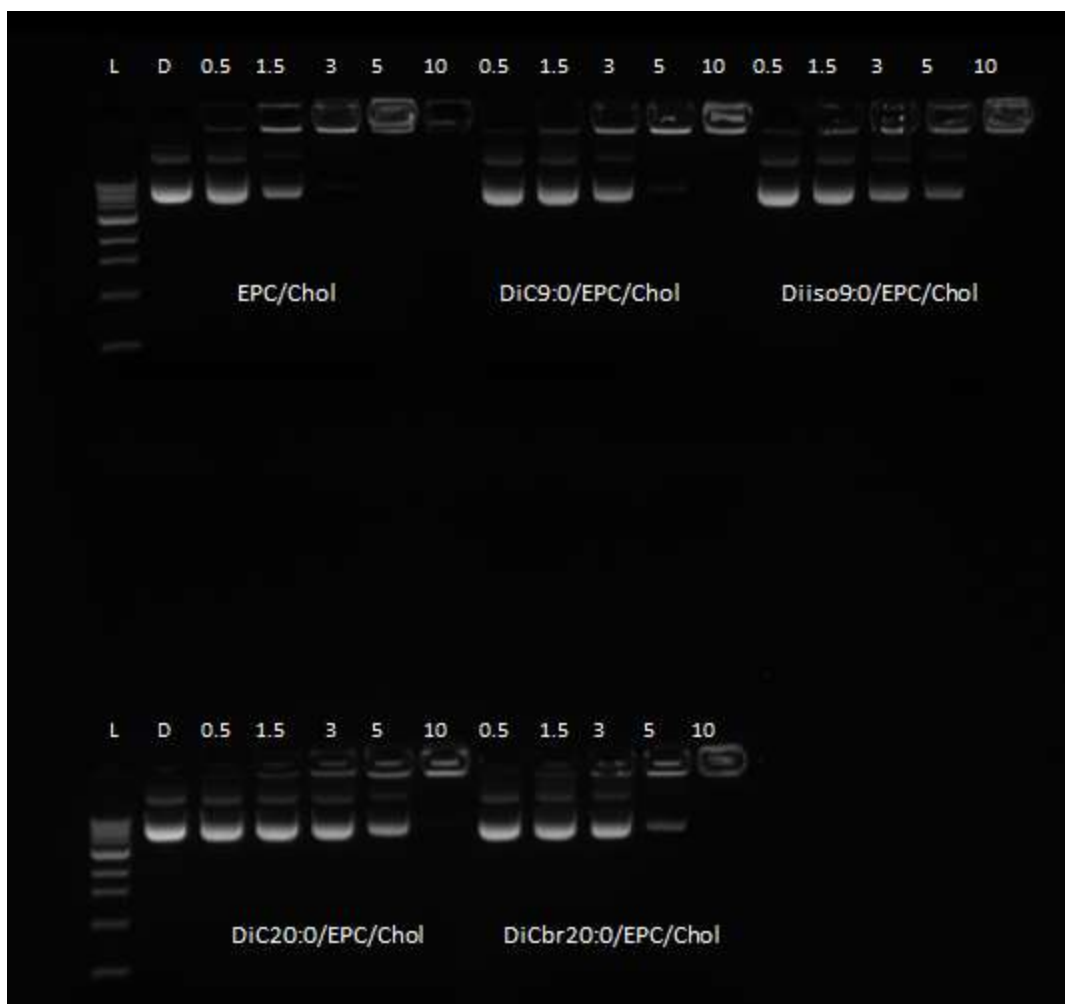

Figure S3 - Gel retardation assay of lipids diC9:0, diCisoC9:0, diC20:0 or dibrC20:0 co-formulated with commercial lipid EPC and neutral co-lipid cholesterol at charge ratios 0.5, 1.5, 3, 5 and 10 and run through a 1% agarose gel impregnated with the pDNA gel stain, ethidium bromide. Lanes  $\lambda$  and DNA denote the 1 kb DNA ladder and pDNA, respectively. Data from the experiment labelled Exp8a in Tables S1-S5.

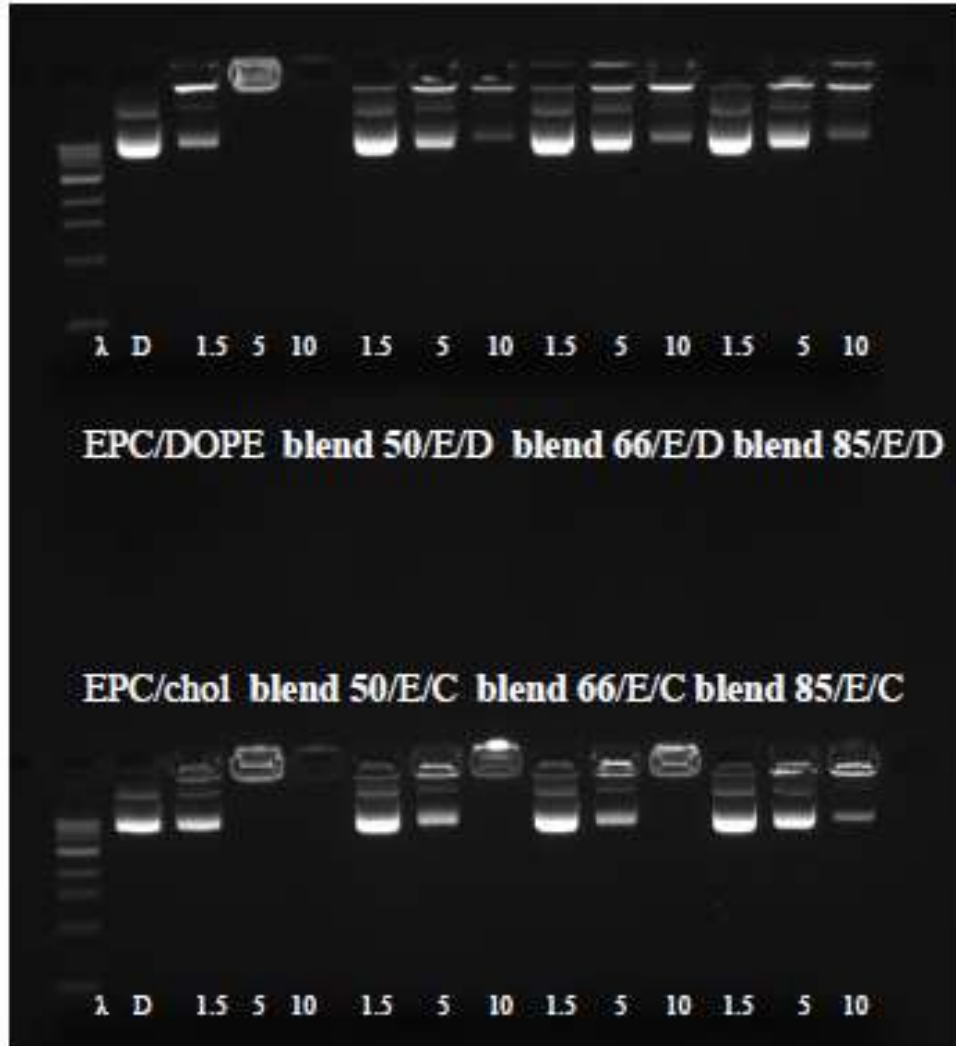

Figure S4 - Gel retardation assay of lipids for blend 50, blend 66 and blend 85 co-formulated with commercial lipid EPC (E) and neutral co-lipid DOPE (D) or cholesterol (C) at charge ratios 1.5, ,5 and 10 and run through a 1% agarose gel impregnated with the pDNA gel stain, ethidium bromide. Lanes  $\lambda$  and DNA denote the 1 kb DNA ladder and pDNA, respectively. Data from the experiment labelled Exp9 in Tables S1-S5.



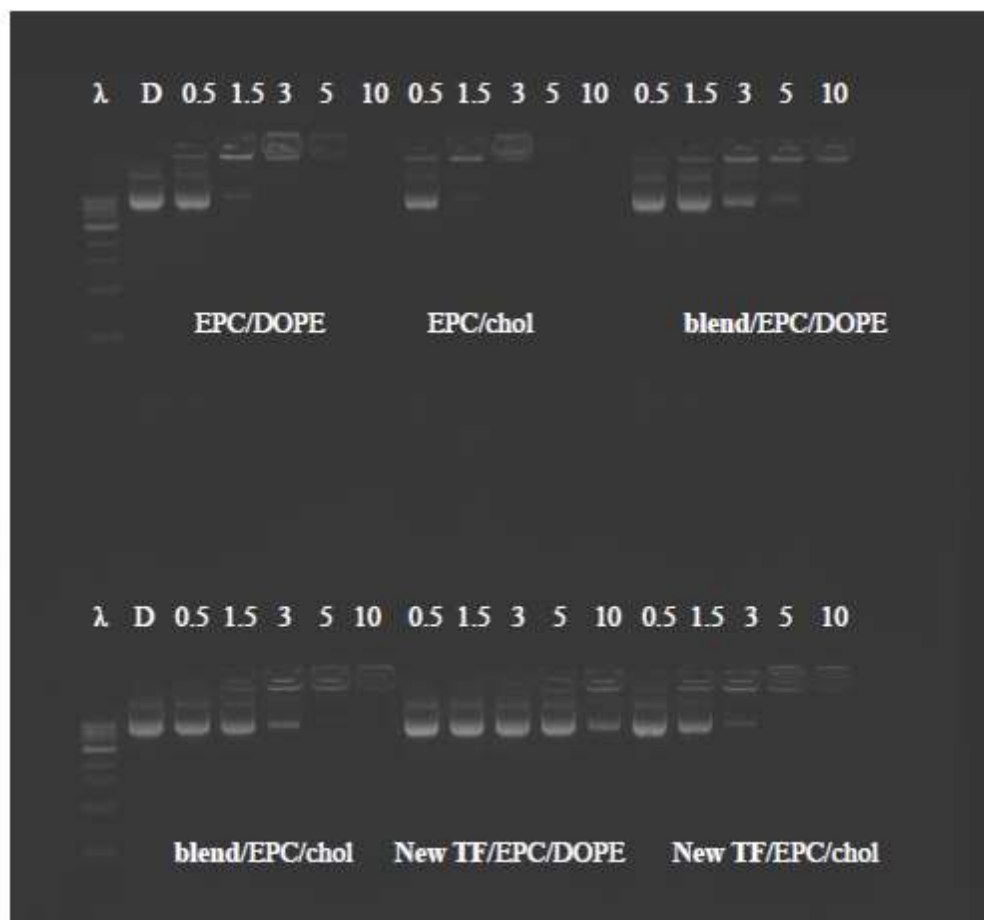

Figure S5 -Gel retardation assay of lipids for synthesized ternary lipid mixture (New TF) and binary blend of pure lipids (blend) co-formulated with commercial lipid EPC and neutral co-lipid DOPE or cholesterol at charge ratios 0.5, 1.5, 3, 5 and 10 and run through a 1% agarose gel impregnated with the pDNA gel stain, ethidium bromide. Lanes  $\lambda$  and DNA denote the 1 kb DNA ladder and pDNA, respectively. Data from the experiment labelled Exp17 in Tables S1-S5.

## DNase I degradation assays

Assays related to experiments labelled Exp1 and Exp4 in Tables S1-S5 were previously reported: Parvizi, P.; Jubeli, E.; Raju, L.; Khalique, N. A.; Almeer, A.; Allam, H.; Manaa, M. A.; Larsen, H.; Nicholson, D.; Pungente, M. D.; Fyles, T. M. Aspects of nonviral gene therapy: Correlation of molecular parameters with lipoplex structure and transfection efficacy in pyridinium-based cationic lipids *Int. J. Pharm.* **2014**, *461*, 145. doi: <http://dx.doi.org/10.1016/j.ijpharm.2013.11.045>

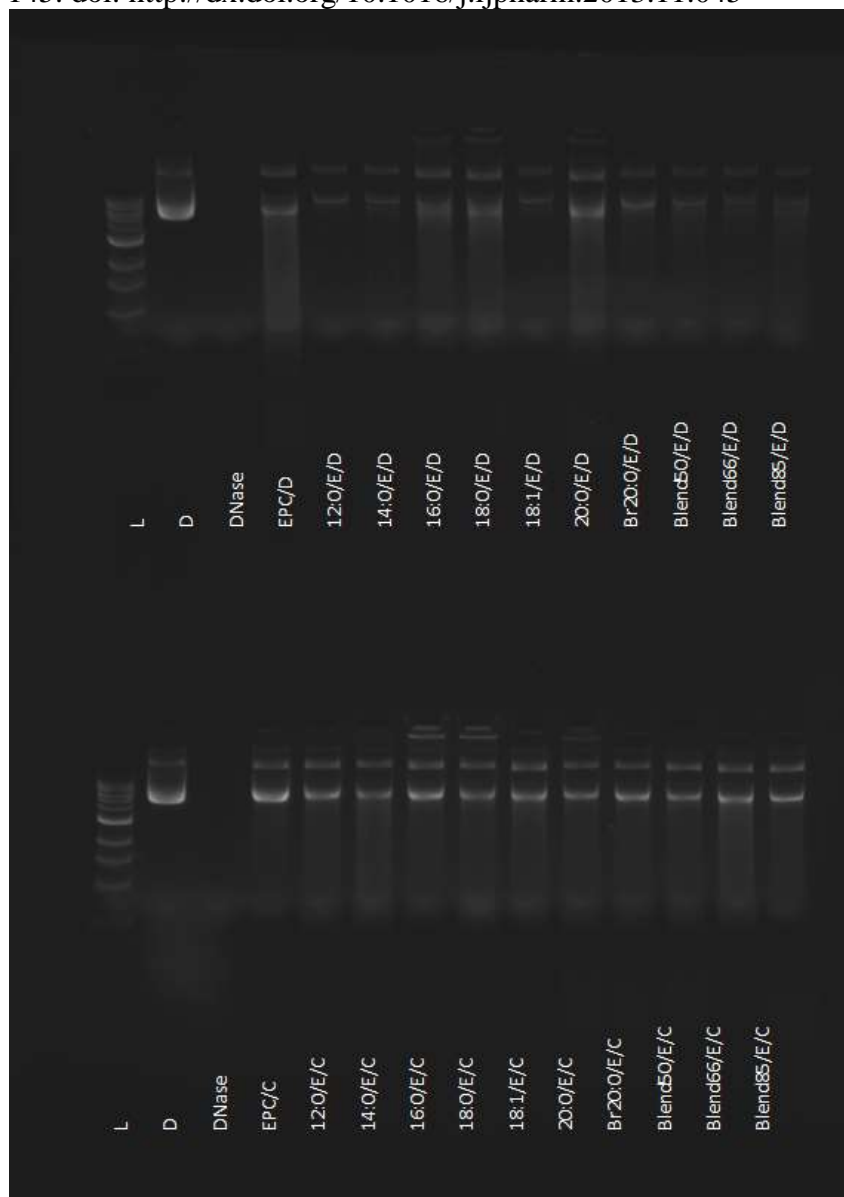

Figure S6 -DNase I degradation assay of lipids diC12:0 to diC20:0 co-formulated with commercial lipid EPC (E) and neutral co-lipid DOPE (D) or cholesterol (C) at molar charge ratios 3, and run through a 1% agarose gel impregnated with the pDNA gel stain, ethidium bromide. Lanes  $\lambda$  and DNA denote the 1 kb DNA ladder and pDNA, respectively. Data from the experiment labelled Exp7 in Tables S1-S5.

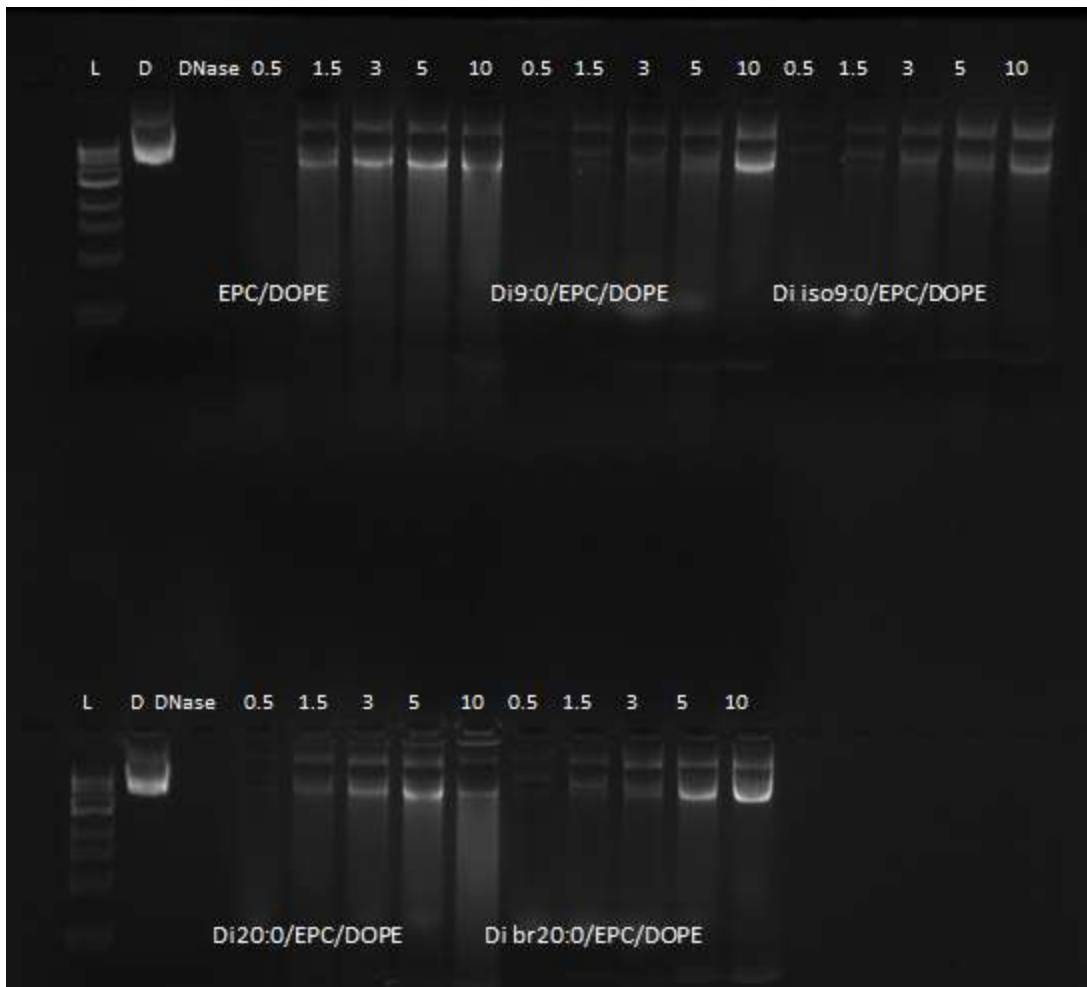

Figure S7 - DNase I degradation assay of lipids diC9:0, diCisoC9:0, diC20:0 or dibrC20:0 co-formulated with commercial lipid EPC and neutral co-lipid DOPE at charge ratios 0.5, 1.5, 3, 5 and 10 and run through a 1% agarose gel impregnated with the pDNA gel stain, ethidium bromide. Lanes  $\lambda$  and DNA denote the 1 kb DNA ladder and pDNA, respectively. Data from the experiment labelled Exp8 in Tables S1-S5.

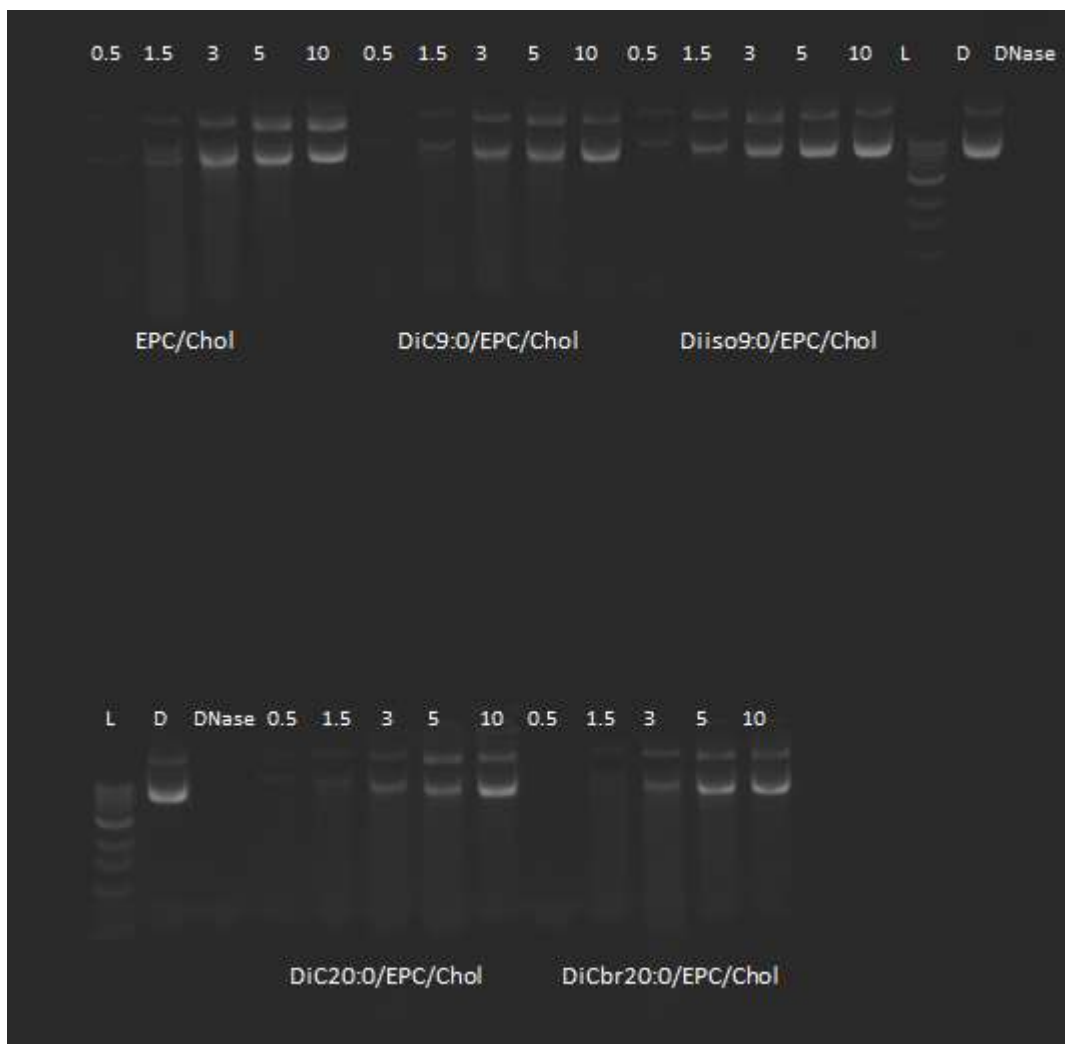

Figure S8 - DNase I degradation assay of lipids diC9:0, diCisoC9:0, diC20:0 or dibrC20:0 co-formulated with commercial lipid EPC and neutral co-lipid cholesterol at charge ratios 0.5, 1.5, 3, 5 and 10 and run through a 1% agarose gel impregnated with the pDNA gel stain, ethidium bromide. Lanes  $\lambda$  and DNA denote the 1 kb DNA ladder and pDNA, respectively. Data from the experiment labelled Exp8a in Tables S1-S5.

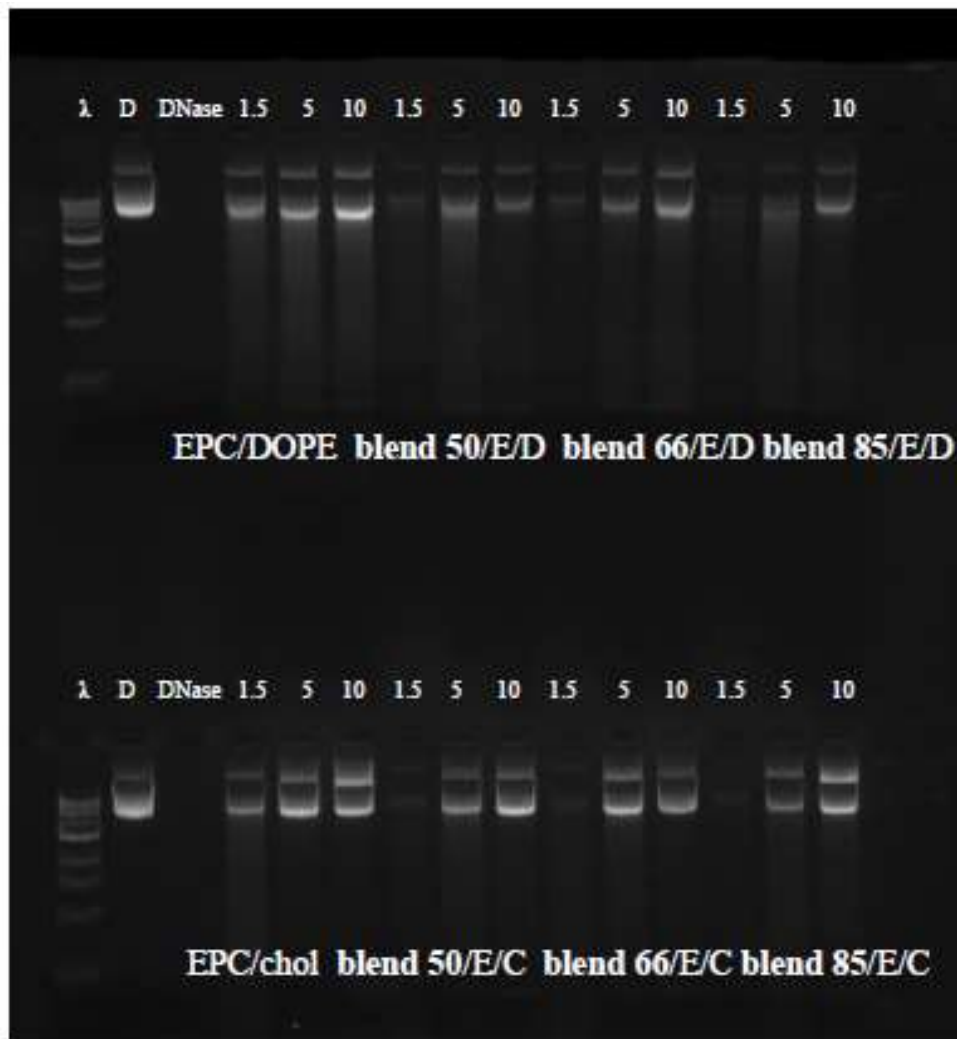

Figure S9 - DNase I degradation assay of blend 50, blend 66 and blend 85 co-formulated with commercial lipid EPC (E) and neutral co-lipid DOPE (D) or cholesterol (C) at charge ratios 1.5, 5 and 10 and run through a 1% agarose gel impregnated with the pDNA gel stain, ethidium bromide. Lanes  $\lambda$  and DNA denote the 1 kb DNA ladder and pDNA, respectively. Data from the experiment labelled Exp9 in Tables S1-S5.

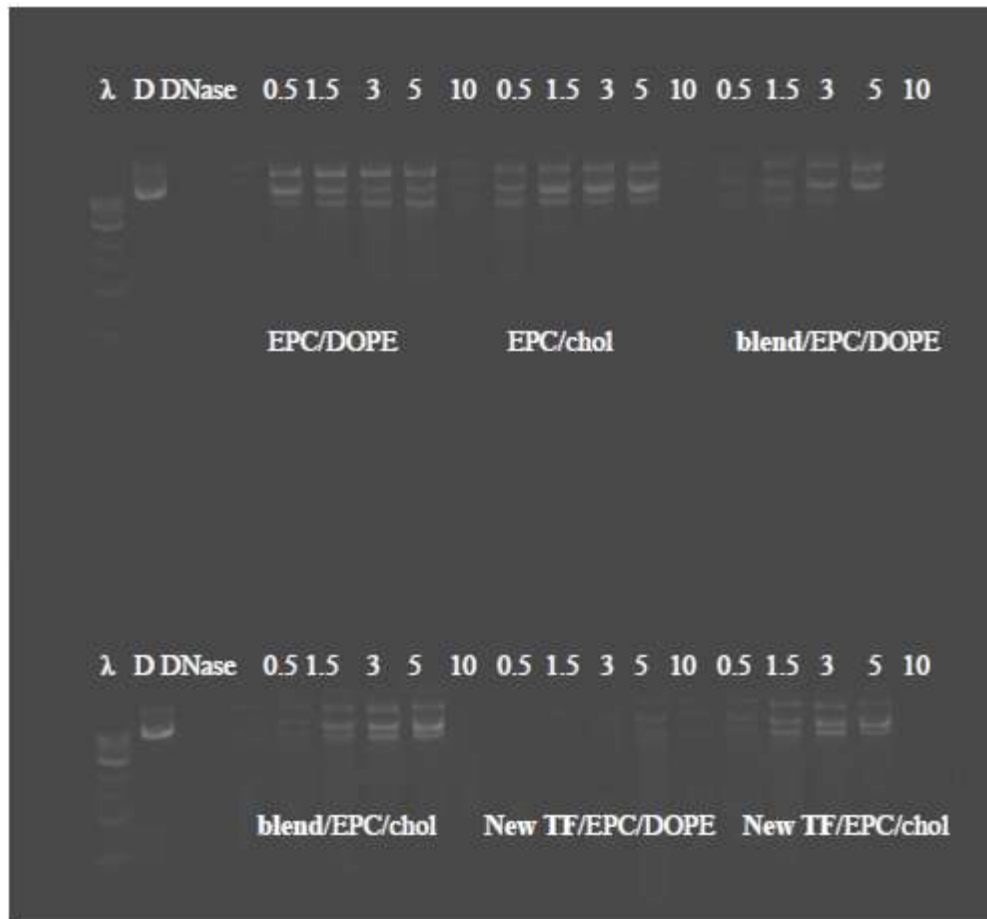

Figure S10 - DNase I degradation assay of lipids synthesized ternary lipids (New TF) and binary blend of pure lipids (blend) co-formulated with commercial lipid EPC and neutral co-lipid DOPE or cholesterol at charge ratios 0.5, 1.5, 3, 5 and 10 and run through a 1% agarose gel impregnated with the pDNA gel stain, ethidium bromide. Lanes  $\lambda$  and DNA denote the 1 kb DNA ladder and pDNA, respectively. Data from the experiment labelled Exp17 in Tables S1-S5.



Figure S11 - DNase I degradation assay of lipids synthesized ternary lipids (New TF) and binary blend of pure lipids (blend) co-formulated with commercial lipid EPC and neutral co-lipid DOPE or cholesterol at charge ratios 0.5, 1.5, 3, 5 and 10 and run through a 1% agarose gel impregnated with the pDNA gel stain, ethidium bromide. Lanes  $\lambda$  and DNA denote the 1 kb DNA ladder and pDNA, respectively. Data from the experiment labelled Exp17 in Tables S1-S5.

## Transfection and cell viability bar charts

Charts related to experiments labelled Exp1 and Exp4 in Table S3 were previously reported: Parvizi, P.; Jubeli, E.; Raju, L.; Khalique, N. A.; Almeer, A.; Allam, H.; Manaa, M. A.; Larsen, H.; Nicholson, D.; Pungente, M. D.; Fyles, T. M. Aspects of nonviral gene therapy: Correlation of molecular parameters with lipoplex structure and transfection efficacy in pyridinium-based cationic lipids *Int. J. Pharm.* **2014**, *461*, 145. doi: <http://dx.doi.org/10.1016/j.ijpharm.2013.11.045>

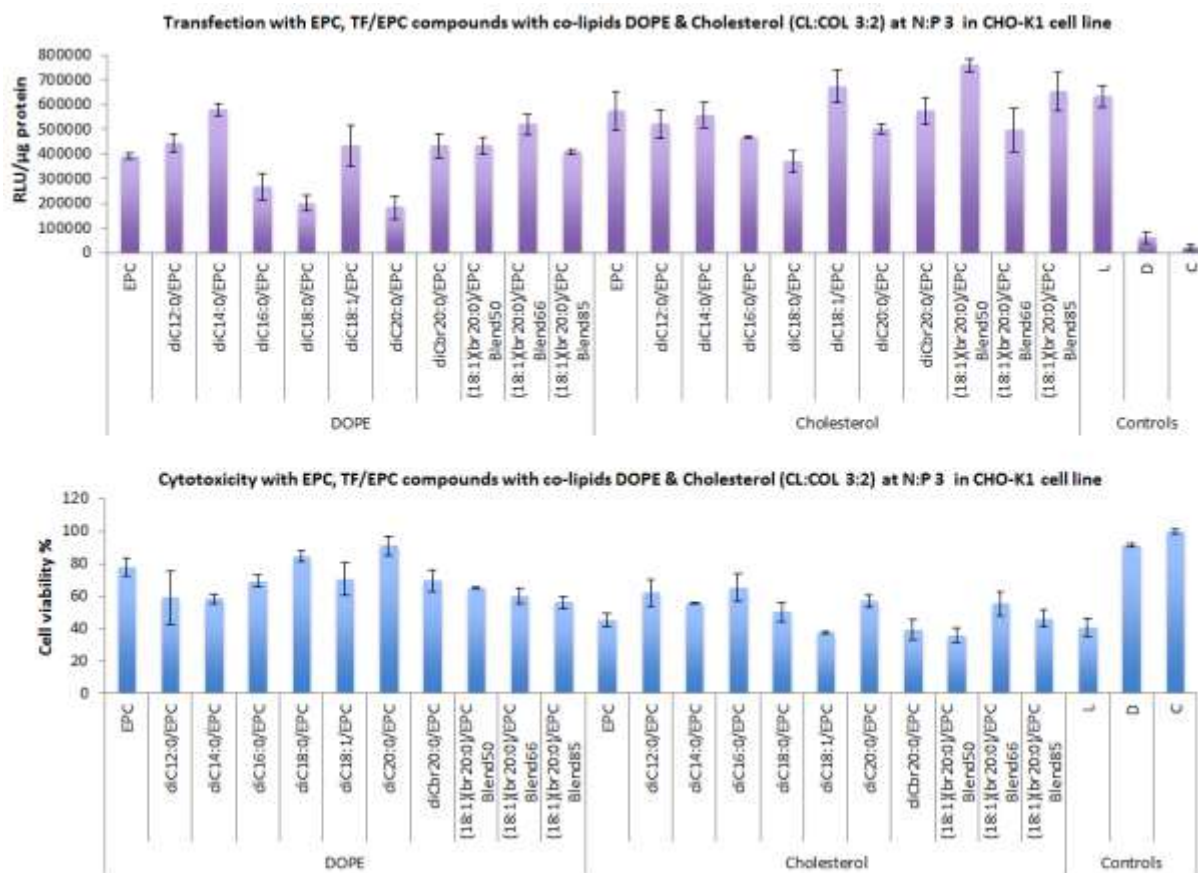

Figure S12 -Transfection efficiency as luminescence readings of  $\beta$ -galactosidase (left) and cytotoxicity (right) (after 48 h) of synthetic lipid diC12:0 to diC20:0/co-lipid/DNA lipoplexes compared to EPC/co-lipid/DNA at molar charge ratio of 3 and Lipofectamine 2000<sup>TM</sup> (Lipo) (n = 9; mean  $\pm$  SD) as positive controls, and plasmid DNA alone and CHO-K1 cells alone as negative controls. Numerical from this experiment is labelled Exp7 in Table S3.



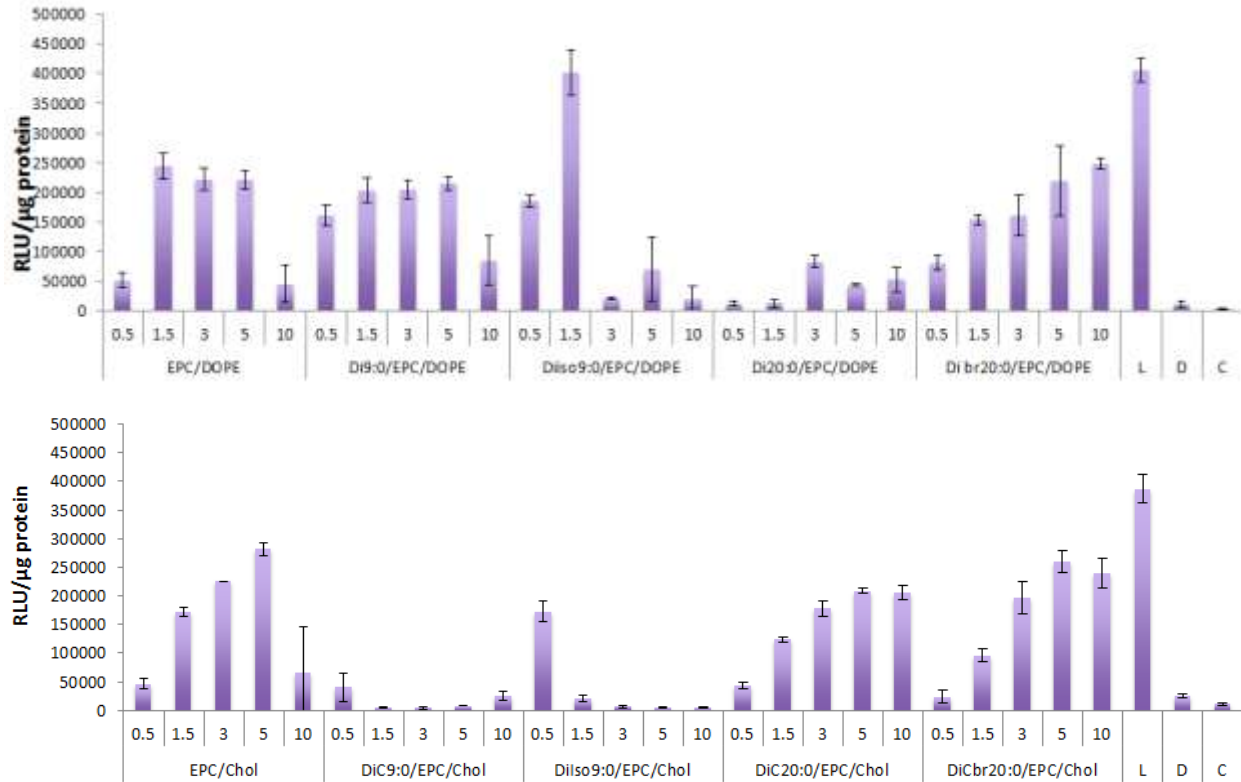

Figure S13 -Transfection efficiency as luminescence readings of  $\beta$ -galactosidase (after 48 h) of diC9:0, diCisoC9:0, diC20:0 or diBrC20:0 co-formulated with commercial lipid EPC and neutral co-lipid DOPE (top) or cholesterol (bottom) at molar charge ratio of 0.5 to 10 and Lipofectamine 2000<sup>TM</sup> (Lipo) (n = 9; mean  $\pm$  SD) as positive controls, and plasmid DNA alone and CHO-K1 cells alone as negative controls. Numerical data from this experiment is labelled Exp8 (top) or Exp8a(bottom) in Table S3.

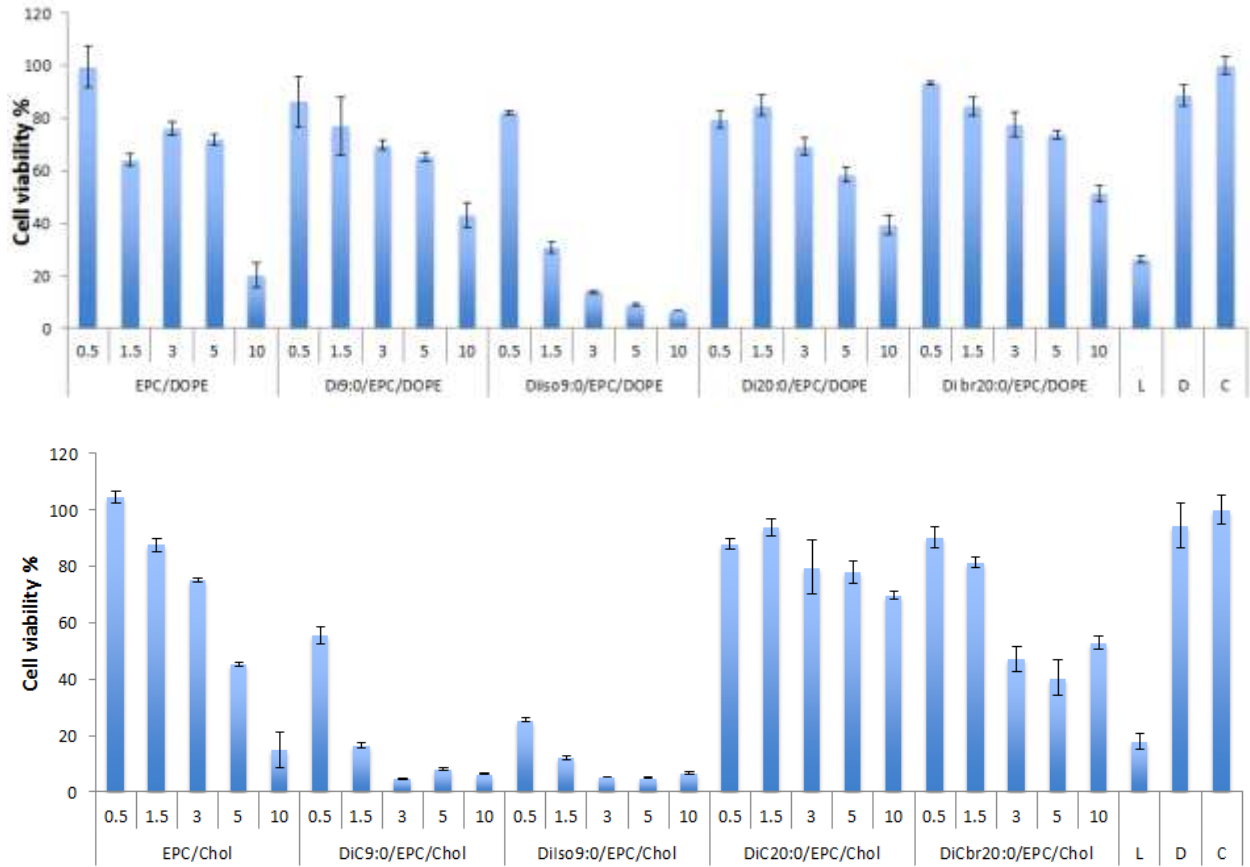

Figure S14 -Cytotoxicity (after 48 h) of diC9:0, diCiso9:0, diC20:0 or diCbr20:0 co-formulated with commercial lipid EPC and neutral co-lipid DOPE (top) or cholesterol (bottom) at molar charge ratio of 0.5 to 10 and Lipofectamine 2000™ (Lipo) (n = 9; mean ± SD) as positive controls, and plasmid DNA alone and CHO-K1 cells alone as negative controls. Numerical data from this experiment is labelled Exp8 (top) or Exp8a(bottom) in Table S3.

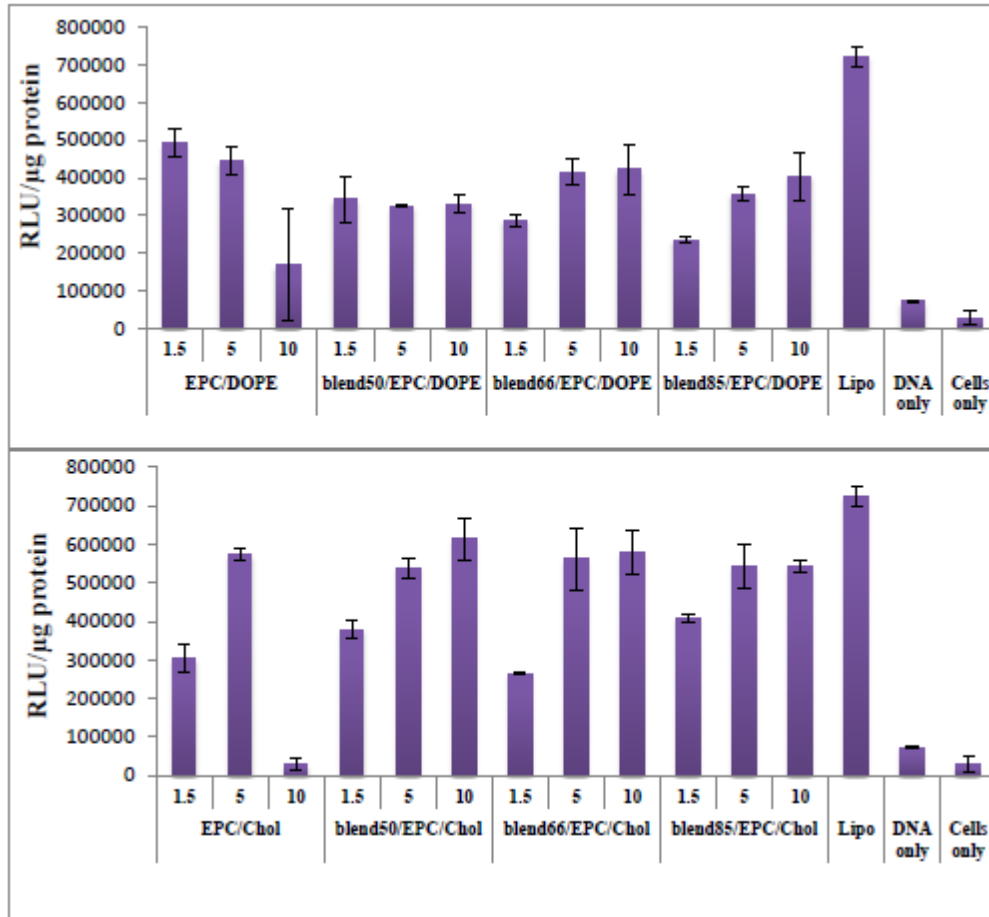

Figure S15 - Transfection efficiency as luminescence readings of  $\beta$ -galactosidase (after 48 h) of blend 50, blend 66 and blend 85/co-lipid/DNA lipoplexes compared to EPC/co-lipid/DNA at molar charge ratios of 1.5, 5 and 10 and Lipofectamine 2000<sup>TM</sup> (Lipo) (n = 9; mean  $\pm$  SD) as positive controls, and plasmid DNA alone and CHO-K1 cells alone as negative controls. Numerical data from this experiment is labelled Exp9 in Table S3.

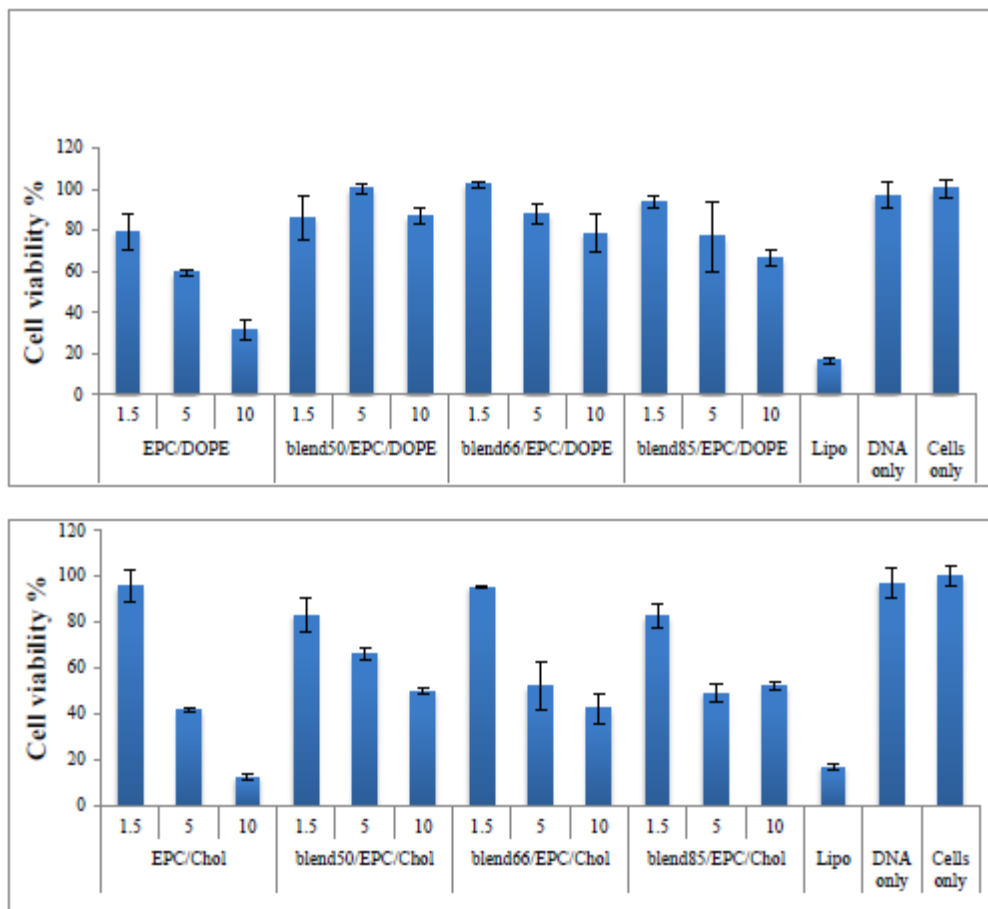

Figure S16 - Cytotoxicity (after 48 h) of blend 50, blend 66 and blend 85/co-lipid/DNA lipoplexes compared to EPC/co-lipid/DNA at molar charge ratios of 1.5, 5 and 10 and Lipofectamine 2000™ (Lipo) (n = 9; mean ± SD) as positive controls, and plasmid DNA alone and CHO-K1 cells alone as negative controls. Numerical data from this experiment is labelled Exp9 in Table S3.

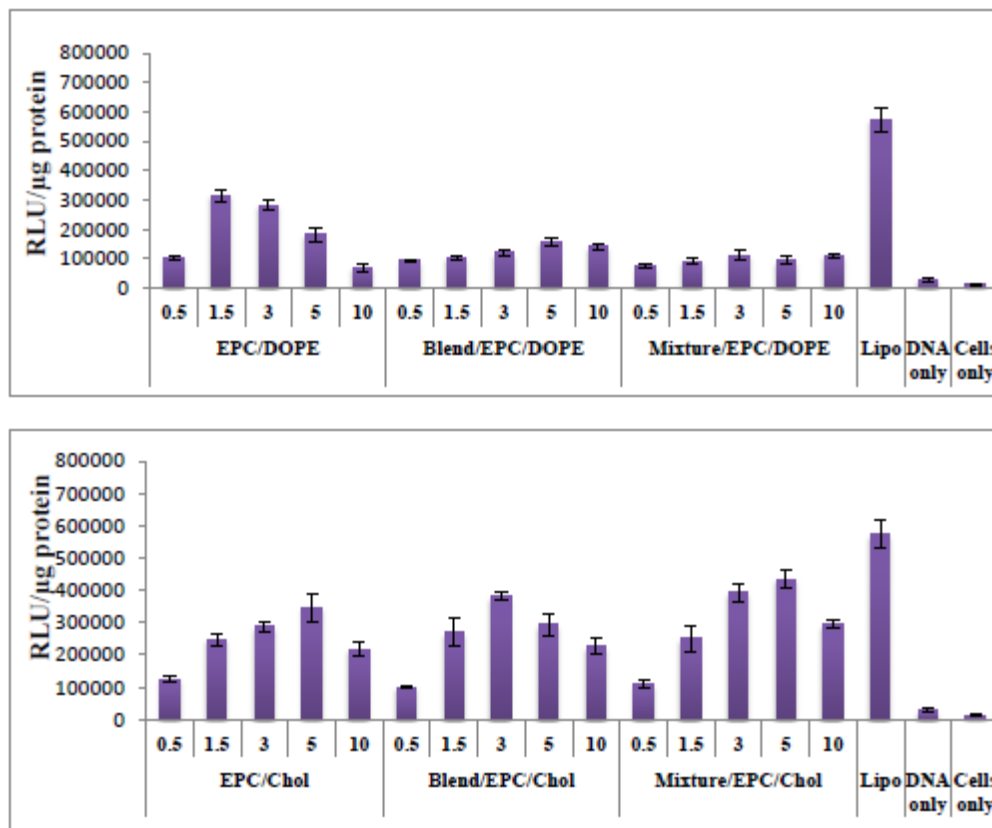

Figure S17 -Transfection efficiency as luminescence readings of  $\beta$ -galactosidase (after 48 h) of synthesized ternary lipids (mixture) and binary blend of pure lipids (blend)/co-lipid/DNA lipoplexes compared to EPC/co-lipid/DNA at molar charge ratio of 0.5 to 10 and Lipofectamine 2000<sup>TM</sup> (Lipo) (n = 9; mean  $\pm$  SD) as positive controls, and plasmid DNA alone and CHO-K1 cells alone as negative controls. Numerical data from this experiment is labelled Exp17 in Table S3.

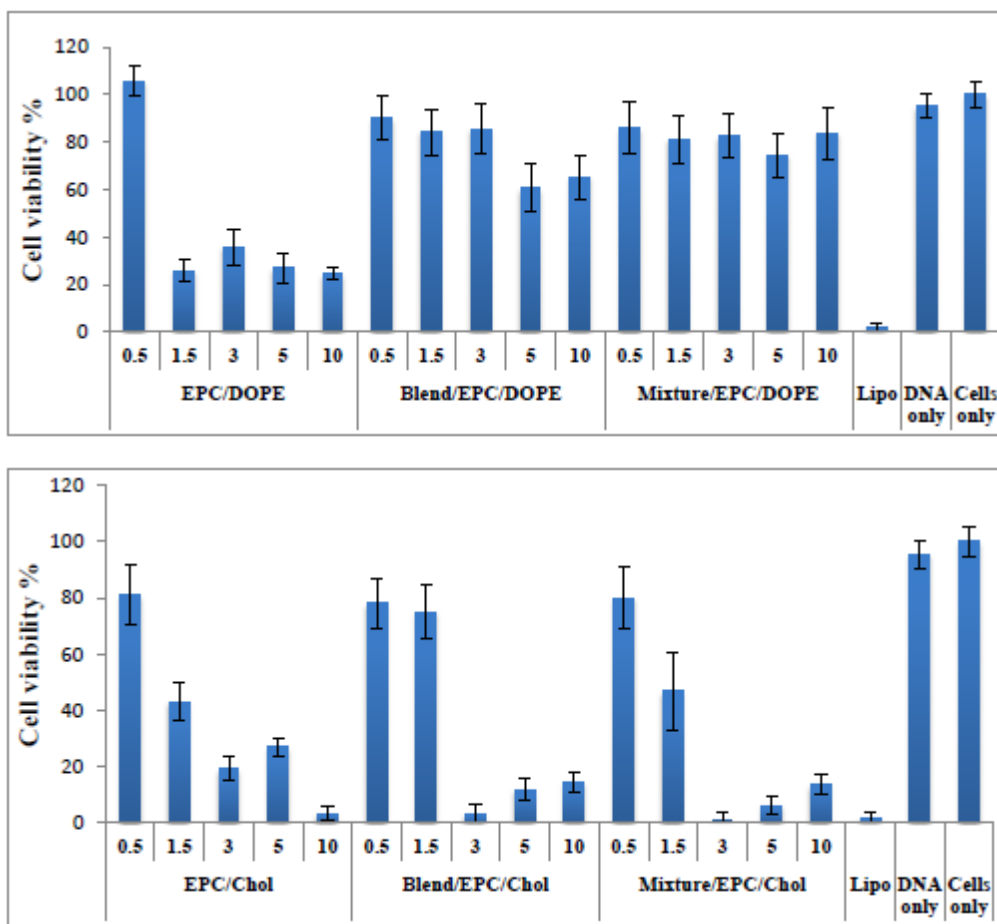

Figure S18 - Cytotoxicity (after 48 h) of synthesized ternary lipids (mixture) and binary blend of pure lipids (blend)/co-lipid/DNA lipoplexes compared to EPC/co-lipid/DNA at molar charge ratio of 0.5 to 10 and Lipofectamine 2000™ (Lipo) (n = 9; mean ± SD) as positive controls, and plasmid DNA alone and CHO-K1 cells alone as negative controls. Numerical data from this experiment is labelled Exp17 in Table S3.

**Table S1: Particle sizing data**

The column headings are: Experiment label; Formulation label used as the experiments were conducted;; Identity of the pyridinium lipid if present (Cat A); Identity of the other cationic lipid (Cat B); Identity of the co-lipid (Co-lipid); three columns giving the molar ratio of Cat A: CatB:Co-lipid; Charge ration of the experiment (CR) as the ratio of N/P cationic lipid:DNA phosphate; Average liposome diameter (Å); Polydispersity index (PDI) of the liposome; Average lipoplex diameter (Å); PDI of the lipoplex

| Label   | Formulation labels             | Cat A                 | Cat B | Co-lipid | mol Cat A | mol Cat B | mol Co | CR   | Zavg dia liposome | PDI liposome /A | Zavg dia lipoplex | PDI lipoplex |
|---------|--------------------------------|-----------------------|-------|----------|-----------|-----------|--------|------|-------------------|-----------------|-------------------|--------------|
| Exp1_1  | D16:0/EPC/DOPE                 | d16:0                 | EPC   | DOPE     | 1.5       | 1.5       | 2      | 0.5  | 671               | 0.5             | 890               | 0.3          |
| Exp1_3  | D16:0/EPC/DOPE                 | d16:0                 | EPC   | DOPE     | 1.5       | 1.5       | 2      | 3.0  | 671               | 0.5             | 1375              | 0.4          |
| Exp1_4  | D16:0/EPC/DOPE                 | d16:0                 | EPC   | DOPE     | 1.5       | 1.5       | 2      | 5.0  | 671               | 0.5             | 1205              | 0.4          |
| Exp1_5  | D16:0/EPC/DOPE                 | d16:0                 | EPC   | DOPE     | 1.5       | 1.5       | 2      | 10.0 | 671               | 0.5             | 1160              | 0.4          |
| Exp1_6  | D16:1/EPC/DOPE                 | d16:1                 | EPC   | DOPE     | 1.5       | 1.5       | 2      | 0.5  | 288               | 0.4             | 1142              | 0.3          |
| Exp1_7  | D16:1/EPC/DOPE                 | d16:1                 | EPC   | DOPE     | 1.5       | 1.5       | 2      | 1.5  | 288               | 0.4             | 1334              | 0.3          |
| Exp1_8  | D16:1/EPC/DOPE                 | d16:1                 | EPC   | DOPE     | 1.5       | 1.5       | 2      | 3.0  | 288               | 0.4             | 1568              | 0.4          |
| Exp1_9  | D16:1/EPC/DOPE                 | d16:1                 | EPC   | DOPE     | 1.5       | 1.5       | 2      | 5.0  | 288               | 0.4             | 2380              | 0.6          |
| Exp1_10 | D16:1/EPC/DOPE                 | d16:1                 | EPC   | DOPE     | 1.5       | 1.5       | 2      | 10.0 | 288               | 0.4             | 1118              | 0.3          |
| Exp1_16 | D16:0/EPC/Chol                 | d16:0                 | EPC   | chol     | 1.5       | 1.5       | 2      | 0.5  | 501               | 0.5             | 876               | 0.3          |
| Exp1_17 | D16:0/EPC/Chol                 | d16:0                 | EPC   | chol     | 1.5       | 1.5       | 2      | 1.5  | 501               | 0.5             | 952               | 0.3          |
| Exp1_18 | D16:0/EPC/Chol                 | d16:0                 | EPC   | chol     | 1.5       | 1.5       | 2      | 3.0  | 501               | 0.5             | 1335              | 0.4          |
| Exp1_19 | D16:0/EPC/Chol                 | d16:0                 | EPC   | chol     | 1.5       | 1.5       | 2      | 5.0  | 501               | 0.5             | 1203              | 0.4          |
| Exp1_2  | D16:0/EPC/DOPE                 | d16:0                 | EPC   | DOPE     | 1.5       | 1.5       | 2      | 1.5  | 671               | 0.5             | 981               | 0.4          |
| Exp1_20 | D16:0/EPC/Chol                 | d16:0                 | EPC   | chol     | 1.5       | 1.5       | 2      | 10.0 | 501               | 0.5             | 1244              | 0.5          |
| Exp1_21 | D16:1/EPC/Chol                 | d16:1                 | EPC   | chol     | 1.5       | 1.5       | 2      | 0.5  | 256               | 0.3             | 497               | 0.3          |
| Exp1_22 | D16:1/EPC/Chol                 | d16:1                 | EPC   | chol     | 1.5       | 1.5       | 2      | 1.5  | 256               | 0.3             | 436               | 0.3          |
| Exp1_23 | D16:1/EPC/Chol                 | d16:1                 | EPC   | chol     | 1.5       | 1.5       | 2      | 3.0  | 256               | 0.3             | 1290              | 0.4          |
| Exp1_24 | D16:1/EPC/Chol                 | d16:1                 | EPC   | chol     | 1.5       | 1.5       | 2      | 5.0  | 256               | 0.3             | 9493              | 0.5          |
| Exp1_25 | D16:1/EPC/Chol                 | d16:1                 | EPC   | chol     | 1.5       | 1.5       | 2      | 10.0 | 256               | 0.3             | 2102              | 0.7          |
| Exp4_6  | (16:0)(11:1)EPC/DOPE           | (16:0)(11:1)mk        | EPC   | DOPE     | 1.5       | 1.5       | 2      | 0.5  | 260               | 0.3             | 1472              | 0.4          |
| Exp4_7  | (16:0)(11:1)EPC/DOPE           | (16:0)(11:1)mk        | EPC   | DOPE     | 1.5       | 1.5       | 2      | 1.5  | 260               | 0.3             | 1733              | 0.3          |
| Exp4_8  | (16:0)(11:1)EPC/DOPE           | (16:0)(11:1)mk        | EPC   | DOPE     | 1.5       | 1.5       | 2      | 3.0  | 260               | 0.3             | 1611              | 0.5          |
| Exp4_9  | (16:0)(11:1)EPC/DOPE           | (16:0)(11:1)mk        | EPC   | DOPE     | 1.5       | 1.5       | 2      | 5.0  | 260               | 0.3             | 4130              | 0.5          |
| Exp4_10 | (16:0)(11:1)EPC/DOPE           | (16:0)(11:1)mk        | EPC   | DOPE     | 1.5       | 1.5       | 2      | 10.0 | 260               | 0.3             | 5200              | 0.3          |
| Exp7_2  | d12:0/EPC/DOPE                 | d12:0                 | EPC   | DOPE     | 1.5       | 1.5       | 2      | 3.0  | 1891              | 0.5             | 2964              | 0.6          |
| Exp7_3  | d14:0/EPC/DOPE                 | d14:0                 | EPC   | DOPE     | 1.5       | 1.5       | 2      | 3.0  | 908               | 0.5             | 2532              | 0.3          |
| Exp7_4  | d16:0/EPC/DOPE                 | d16:0                 | EPC   | DOPE     | 1.5       | 1.5       | 2      | 3.0  | 209               | 0.2             | 3621              | 0.4          |
| Exp7_5  | d18:0/EPC/DOPE                 | d18:0                 | EPC   | DOPE     | 1.5       | 1.5       | 2      | 3.0  | 357               | 0.3             | 649               | 0.3          |
| Exp7_6  | d18:1/EPC/DOPE                 | d18:1                 | EPC   | DOPE     | 1.5       | 1.5       | 2      | 3.0  | 723               | 0.8             | 4992              | 0.4          |
| Exp7_7  | d12:0/EPC/DOPE                 | d12:0                 | EPC   | DOPE     | 1.5       | 1.5       | 2      | 3.0  | 392               | 0.3             | 4219              | 0.4          |
| Exp7_8  | d12:0/EPC/DOPE                 | d12:0                 | EPC   | DOPE     | 1.5       | 1.5       | 2      | 3.0  | 542               | 0.9             | 661               | 0.3          |
| Exp7_9  | (18:1)(br20:0)EPC Blend50/DOPE | (18:1)(br20:0)blend50 | EPC   | DOPE     | 1.5       | 1.5       | 2      | 3.0  | 481               | 0.5             | 864               | 0.5          |
| Exp7_10 | (18:1)(br20:0)EPC Blend66/DOPE | (18:1)(br20:0)blend66 | EPC   | DOPE     | 1.5       | 1.5       | 2      | 3.0  | 1923              | 0.7             | 807               | 0.4          |
| Exp7_11 | (18:1)(br20:0)EPC Blend85/DOPE | (18:1)(br20:0)blend85 | EPC   | DOPE     | 1.5       | 1.5       | 2      | 3.0  | 324               | 0.4             | 470               | 0.3          |
| Exp7_13 | d12:0/EPC/Chol                 | d12:0                 | EPC   | chol     | 1.5       | 1.5       | 2      | 3.0  | 1367              | 0.5             | 1096              | 0.4          |
| Exp7_14 | d14:0/EPC/Chol                 | d14:0                 | EPC   | chol     | 1.5       | 1.5       | 2      | 3.0  | 330               | 0.9             | 1227              | 0.5          |

| Label    | Formulation labels             | Cat A                 | Cat B | Co-lipid | mol   |       | molCat B | molCo | CR   | liposome |     | PDI liposome/IA | lipoplex |    |
|----------|--------------------------------|-----------------------|-------|----------|-------|-------|----------|-------|------|----------|-----|-----------------|----------|----|
|          |                                |                       |       |          | Cat A | Cat B |          |       |      | IA       | IA  |                 | IA       | IA |
| Exp7_15  | d1C16:0/EPC/chol               | d1C16:0               | EPC   | chol     | 15    | 15    | 15       | 2     | 3.0  | 842      | 0.5 | 2451            | 0.5      |    |
| Exp7_16  | d1C18:0/EPC/chol               | d1C18:0               | EPC   | chol     | 15    | 15    | 15       | 2     | 3.0  | 372      | 0.3 | 1589            | 0.4      |    |
| Exp7_17  | d1C18:1/EPC/chol               | d1C18:1               | EPC   | chol     | 15    | 15    | 15       | 2     | 3.0  | 338      | 0.4 | 344             | 0.2      |    |
| Exp7_18  | d1C20:0/EPC/chol               | d1C20:0               | EPC   | chol     | 15    | 15    | 15       | 2     | 3.0  | 668      | 0.5 | 658             | 0.4      |    |
| Exp7_19  | d1Cbr20:0/EPC/chol             | d1Cbr20:0             | EPC   | chol     | 15    | 15    | 15       | 2     | 3.0  | 392      | 0.4 | 497             | 0.3      |    |
| Exp7_20  | (18:1)(br20:0)EPC Blend50/chol | (18:1)(br20:0)blend50 | EPC   | chol     | 15    | 15    | 15       | 2     | 3.0  | 274      | 0.3 | 2074            | 0.6      |    |
| Exp7_21  | (18:1)(br20:0)EPC Blend66/chol | (18:1)(br20:0)blend66 | EPC   | chol     | 15    | 15    | 15       | 2     | 3.0  | 181      | 0.3 | 3367            | 0.6      |    |
| Exp7_22  | (18:1)(br20:0)EPC Blend85/chol | (18:1)(br20:0)blend85 | EPC   | chol     | 15    | 15    | 15       | 2     | 3.0  | 414      | 0.5 | 511             | 0.4      |    |
| Exp8_6   | D19:0/EPC/DOPE                 | d1C9:0                | EPC   | DOPE     | 15    | 15    | 15       | 2     | 0.5  | 197      | 0.4 | 1103            | 0.2      |    |
| Exp8_7   | D19:0/EPC/DOPE                 | d1C9:0                | EPC   | DOPE     | 15    | 15    | 15       | 2     | 1.5  | 197      | 0.4 | 1066            | 0.3      |    |
| Exp8_8   | D19:0/EPC/DOPE                 | d1C9:0                | EPC   | DOPE     | 15    | 15    | 15       | 2     | 3.0  | 197      | 0.4 | 834             | 0.3      |    |
| Exp8_9   | D19:0/EPC/DOPE                 | d1C9:0                | EPC   | DOPE     | 15    | 15    | 15       | 2     | 5.0  | 197      | 0.4 | 3782            | 0.3      |    |
| Exp8_10  | D19:0/EPC/DOPE                 | d1C9:0                | EPC   | DOPE     | 15    | 15    | 15       | 2     | 10.0 | 197      | 0.4 | 4756            | 0.6      |    |
| Exp8_11  | D19:0/EPC/DOPE                 | d1C9:0                | EPC   | DOPE     | 15    | 15    | 15       | 2     | 0.5  | 396      | 0.4 | 1394            | 0.3      |    |
| Exp8_12  | D19:0/EPC/DOPE                 | d1C9:0                | EPC   | DOPE     | 15    | 15    | 15       | 2     | 1.5  | 396      | 0.4 | 1677            | 0.3      |    |
| Exp8_13  | D19:0/EPC/DOPE                 | d1C9:0                | EPC   | DOPE     | 15    | 15    | 15       | 2     | 3.0  | 396      | 0.4 | 1526            | 0.4      |    |
| Exp8_14  | D19:0/EPC/DOPE                 | d1C9:0                | EPC   | DOPE     | 15    | 15    | 15       | 2     | 5.0  | 396      | 0.4 | 2468            | 0.3      |    |
| Exp8_15  | D19:0/EPC/DOPE                 | d1C9:0                | EPC   | DOPE     | 15    | 15    | 15       | 2     | 10.0 | 396      | 0.4 | 4150            | 0.6      |    |
| Exp8_16  | D19:0/EPC/DOPE                 | d1C20:0               | EPC   | DOPE     | 15    | 15    | 15       | 2     | 0.5  | 369      | 0.4 | 483             | 0.3      |    |
| Exp8_17  | D19:0/EPC/DOPE                 | d1C20:0               | EPC   | DOPE     | 15    | 15    | 15       | 2     | 1.5  | 369      | 0.4 | 541             | 0.3      |    |
| Exp8_18  | D19:0/EPC/DOPE                 | d1C20:0               | EPC   | DOPE     | 15    | 15    | 15       | 2     | 3.0  | 369      | 0.4 | 4388            | 0.5      |    |
| Exp8_19  | D19:0/EPC/DOPE                 | d1C20:0               | EPC   | DOPE     | 15    | 15    | 15       | 2     | 5.0  | 369      | 0.4 | 5339            | 0.4      |    |
| Exp8_20  | D19:0/EPC/DOPE                 | d1C20:0               | EPC   | DOPE     | 15    | 15    | 15       | 2     | 10.0 | 369      | 0.4 | 1989            | 0.4      |    |
| Exp8_21  | D19:0/EPC/DOPE                 | d1Cbr20:0             | EPC   | DOPE     | 15    | 15    | 15       | 2     | 0.5  | 473      | 0.5 | 542             | 0.2      |    |
| Exp8_22  | D19:0/EPC/DOPE                 | d1Cbr20:0             | EPC   | DOPE     | 15    | 15    | 15       | 2     | 1.5  | 473      | 0.5 | 502             | 0.2      |    |
| Exp8_23  | D19:0/EPC/DOPE                 | d1Cbr20:0             | EPC   | DOPE     | 15    | 15    | 15       | 2     | 3.0  | 473      | 0.5 | 505             | 0.2      |    |
| Exp8_24  | D19:0/EPC/DOPE                 | d1Cbr20:0             | EPC   | DOPE     | 15    | 15    | 15       | 2     | 5.0  | 473      | 0.5 | 569             | 0.3      |    |
| Exp8_25  | D19:0/EPC/DOPE                 | d1Cbr20:0             | EPC   | DOPE     | 15    | 15    | 15       | 2     | 10.0 | 473      | 0.5 | 4135            | 0.8      |    |
| Exp8a_6  | D19:0/EPC/chol                 | d1C9:0                | EPC   | chol     | 15    | 15    | 15       | 2     | 0.5  | 287      | 0.2 | 353             | 0.3      |    |
| Exp8a_7  | D19:0/EPC/chol                 | d1C9:0                | EPC   | chol     | 15    | 15    | 15       | 2     | 1.5  | 287      | 0.2 | 377             | 0.3      |    |
| Exp8a_8  | D19:0/EPC/chol                 | d1C9:0                | EPC   | chol     | 15    | 15    | 15       | 2     | 3.0  | 287      | 0.2 | 1498            | 0.4      |    |
| Exp8a_9  | D19:0/EPC/chol                 | d1C9:0                | EPC   | chol     | 15    | 15    | 15       | 2     | 5.0  | 287      | 0.2 | 5896            | 0.4      |    |
| Exp8a_10 | D19:0/EPC/chol                 | d1C9:0                | EPC   | chol     | 15    | 15    | 15       | 2     | 10.0 | 287      | 0.2 | 429             | 0.2      |    |
| Exp8a_11 | D19:0/EPC/chol                 | d1C9:0                | EPC   | chol     | 15    | 15    | 15       | 2     | 0.5  | 186      | 0.5 | 678             | 0.3      |    |
| Exp8a_12 | D19:0/EPC/chol                 | d1C9:0                | EPC   | chol     | 15    | 15    | 15       | 2     | 1.5  | 186      | 0.5 | 620             | 0.3      |    |
| Exp8a_13 | D19:0/EPC/chol                 | d1C9:0                | EPC   | chol     | 15    | 15    | 15       | 2     | 3.0  | 186      | 0.5 | 2016            | 0.6      |    |



| Label    | Formulation labels              | Cat A                           | Cat B | Co-<br>lipid | mol   |    | CR | liposome |             | PDI | lipoplex |             |
|----------|---------------------------------|---------------------------------|-------|--------------|-------|----|----|----------|-------------|-----|----------|-------------|
|          |                                 |                                 |       |              | Cat A | B  |    | IA       | liposome /A |     | IA       | lipoplex /A |
| Exp8a_14 | Diiso9:0/EPC/choh               | diisoC9:0                       | EPC   | choh         | 15    | 15 | 2  | 5.0      | 1186        | 0.5 | 5765     | 0.4         |
| Exp8a_15 | Diiso9:0/EPC/choh               | diisoC9:0                       | EPC   | choh         | 15    | 15 | 2  | 10.0     | 1186        | 0.5 | 2923     | 0.5         |
| Exp8a_16 | Di20:0/EPC/choh                 | dIC20:0                         | EPC   | choh         | 15    | 15 | 2  | 0.5      | 632         | 0.7 | 465      | 0.4         |
| Exp8a_17 | Di20:0/EPC/choh                 | dIC20:0                         | EPC   | choh         | 15    | 15 | 2  | 1.5      | 632         | 0.7 | 467      | 0.3         |
| Exp8a_18 | Di20:0/EPC/choh                 | dIC20:0                         | EPC   | choh         | 15    | 15 | 2  | 3.0      | 632         | 0.7 | 559      | 0.4         |
| Exp8a_19 | Di20:0/EPC/choh                 | dIC20:0                         | EPC   | choh         | 15    | 15 | 2  | 5.0      | 632         | 0.7 | 4421     | 0.7         |
| Exp8a_20 | Di20:0/EPC/choh                 | dIC20:0                         | EPC   | choh         | 15    | 15 | 2  | 10.0     | 632         | 0.7 | 3651     | 0.6         |
| Exp8a_21 | Di18:20:0/EPC/choh              | dIbrc20:0                       | EPC   | choh         | 15    | 15 | 2  | 0.5      | 278         | 0.3 | 304      | 0.3         |
| Exp8a_22 | Di18:20:0/EPC/choh              | dIbrc20:0                       | EPC   | choh         | 15    | 15 | 2  | 1.5      | 278         | 0.3 | 350      | 0.2         |
| Exp8a_23 | Di18:20:0/EPC/choh              | dIbrc20:0                       | EPC   | choh         | 15    | 15 | 2  | 3.0      | 278         | 0.3 | 3278     | 0.7         |
| Exp8a_24 | Di18:20:0/EPC/choh              | dIbrc20:0                       | EPC   | choh         | 15    | 15 | 2  | 5.0      | 278         | 0.3 | 5839     | 0.4         |
| Exp8a_25 | Di18:20:0/EPC/choh              | dIbrc20:0                       | EPC   | choh         | 15    | 15 | 2  | 10.0     | 278         | 0.3 | 301      | 0.2         |
| Exp9_4   | (18:1)(18:20:0)blend50/EPC/DOPE | (18:1)(18:20:0)blend50          | EPC   | DOPE         | 15    | 15 | 2  | 1.5      | 481         | 0.5 | 515      | 0.3         |
| Exp9_5   | (18:1)(18:20:0)blend50/EPC/DOPE | (18:1)(18:20:0)blend50          | EPC   | DOPE         | 15    | 15 | 2  | 5.0      | 481         | 0.5 | 641      | 0.3         |
| Exp9_6   | (18:1)(18:20:0)blend50/EPC/DOPE | (18:1)(18:20:0)blend50          | EPC   | DOPE         | 15    | 15 | 2  | 10.0     | 481         | 0.5 | 7320     | 0.5         |
| Exp9_7   | (18:1)(18:20:0)blend66/EPC/DOPE | (18:1)(18:20:0)blend66          | EPC   | DOPE         | 15    | 15 | 2  | 1.5      | 1923        | 0.7 | 618      | 0.3         |
| Exp9_8   | (18:1)(18:20:0)blend66/EPC/DOPE | (18:1)(18:20:0)blend66          | EPC   | DOPE         | 15    | 15 | 2  | 5.0      | 1923        | 0.7 | 607      | 0.3         |
| Exp9_9   | (18:1)(18:20:0)blend66/EPC/DOPE | (18:1)(18:20:0)blend66          | EPC   | DOPE         | 15    | 15 | 2  | 10.0     | 1923        | 0.7 | 3056     | 0.7         |
| Exp9_10  | (18:1)(18:20:0)blend85/EPC/DOPE | (18:1)(18:20:0)blend85          | EPC   | DOPE         | 15    | 15 | 2  | 1.5      | 324         | 0.4 | 395      | 0.3         |
| Exp9_11  | (18:1)(18:20:0)blend85/EPC/DOPE | (18:1)(18:20:0)blend85          | EPC   | DOPE         | 15    | 15 | 2  | 5.0      | 324         | 0.4 | 522      | 0.3         |
| Exp9_12  | (18:1)(18:20:0)blend85/EPC/DOPE | (18:1)(18:20:0)blend85          | EPC   | DOPE         | 15    | 15 | 2  | 10.0     | 324         | 0.4 | 4961     | 0.5         |
| Exp9_16  | (18:1)(18:20:0)blend50/EPC/Chol | (18:1)(18:20:0)blend50          | EPC   | choh         | 15    | 15 | 2  | 1.5      | 274         | 0.3 | 301      | 0.2         |
| Exp9_17  | (18:1)(18:20:0)blend50/EPC/Chol | (18:1)(18:20:0)blend50          | EPC   | choh         | 15    | 15 | 2  | 5.0      | 274         | 0.3 | 10153    | 0.4         |
| Exp9_18  | (18:1)(18:20:0)blend50/EPC/Chol | (18:1)(18:20:0)blend50          | EPC   | choh         | 15    | 15 | 2  | 10.0     | 274         | 0.3 | 385      | 0.2         |
| Exp9_19  | (18:1)(18:20:0)blend66/EPC/Chol | (18:1)(18:20:0)blend66          | EPC   | choh         | 15    | 15 | 2  | 1.5      | 181         | 0.3 | 252      | 0.2         |
| Exp9_20  | (18:1)(18:20:0)blend66/EPC/Chol | (18:1)(18:20:0)blend66          | EPC   | choh         | 15    | 15 | 2  | 5.0      | 181         | 0.3 | 13990    | 0.6         |
| Exp9_21  | (18:1)(18:20:0)blend66/EPC/Chol | (18:1)(18:20:0)blend66          | EPC   | choh         | 15    | 15 | 2  | 10.0     | 181         | 0.3 | 280      | 0.1         |
| Exp9_22  | (18:1)(18:20:0)blend85/EPC/Chol | (18:1)(18:20:0)blend85          | EPC   | choh         | 15    | 15 | 2  | 1.5      | 414         | 0.5 | 409      | 0.3         |
| Exp9_23  | (18:1)(18:20:0)blend85/EPC/Chol | (18:1)(18:20:0)blend85          | EPC   | choh         | 15    | 15 | 2  | 5.0      | 414         | 0.5 | 2745     | 0.6         |
| Exp9_24  | (18:1)(18:20:0)blend85/EPC/Chol | (18:1)(18:20:0)blend85          | EPC   | choh         | 15    | 15 | 2  | 10.0     | 414         | 0.5 | 5680     | 0.8         |
| Exp17_11 | blend(18:1)(18:20:0)32/EPC/Chol | (18:1)(18:20:0)blend0.32(10.68) | EPC   | DOPE         | 15    | 15 | 2  | 0.5      | 445         | 0.3 | 689      | 0.3         |
| Exp17_12 | blend(18:1)(18:20:0)32/EPC/Chol | (18:1)(18:20:0)blend0.32(10.68) | EPC   | DOPE         | 15    | 15 | 2  | 1.5      | 445         | 0.3 | 586      | 0.3         |
| Exp17_13 | blend(18:1)(18:20:0)32/EPC/Chol | (18:1)(18:20:0)blend0.32(10.68) | EPC   | DOPE         | 15    | 15 | 2  | 3.0      | 445         | 0.3 | 827      | 0.3         |
| Exp17_14 | blend(18:1)(18:20:0)32/EPC/Chol | (18:1)(18:20:0)blend0.32(10.68) | EPC   | DOPE         | 15    | 15 | 2  | 5.0      | 445         | 0.3 | 5750     | 0.5         |
| Exp17_15 | blend(18:1)(18:20:0)32/EPC/Chol | (18:1)(18:20:0)blend0.32(10.68) | EPC   | DOPE         | 15    | 15 | 2  | 10.0     | 445         | 0.3 | 6887     | 0.4         |
| Exp17_16 | blend(18:1)(18:20:0)32/EPC/Chol | (18:1)(18:20:0)blend0.32(10.68) | EPC   | choh         | 15    | 15 | 2  | 0.5      | 379         | 0.4 | 277      | 0.4         |

| Label    | Formulation labels             | Cat A                        | Cat B | Co-lipid | mol   |     | molCo | CR   | liposome /A | PDI liposome /A | lipoplex /A | lipoplex /A |
|----------|--------------------------------|------------------------------|-------|----------|-------|-----|-------|------|-------------|-----------------|-------------|-------------|
|          |                                |                              |       |          | Cat A | B   |       |      |             |                 |             |             |
| Exp17_17 | blend(18:1)(br20:0)32/EPC/Chol | (18:1)(br20:0)blend0.32/0.68 | EPC   | chol     | 1.5   | 1.5 | 2     | 1.5  | 379         | 0.4             | 324         | 0.3         |
| Exp17_18 | blend(18:1)(br20:0)32/EPC/Chol | (18:1)(br20:0)blend0.32/0.68 | EPC   | chol     | 1.5   | 1.5 | 2     | 3.0  | 379         | 0.4             | 7738        | 0.3         |
| Exp17_19 | blend(18:1)(br20:0)32/EPC/Chol | (18:1)(br20:0)blend0.32/0.68 | EPC   | chol     | 1.5   | 1.5 | 2     | 5.0  | 379         | 0.4             | 3625        | 0.7         |
| Exp17_20 | blend(18:1)(br20:0)32/EPC/Chol | (18:1)(br20:0)blend0.32/0.68 | EPC   | chol     | 1.5   | 1.5 | 2     | 10.0 | 379         | 0.4             | 294         | 0.2         |
| Exp17_21 | mix (br20:0)(18:1)EPC/Chol     | (C18:1)(brC20:0)mix          | EPC   | DOPE     | 1.5   | 1.5 | 2     | 0.5  | 462         | 0.4             | 737         | 0.4         |
| Exp17_22 | mix (br20:0)(18:1)EPC/Chol     | (C18:1)(brC20:0)mix          | EPC   | DOPE     | 1.5   | 1.5 | 2     | 1.5  | 462         | 0.4             | 530         | 0.3         |
| Exp17_23 | mix (br20:0)(18:1)EPC/Chol     | (C18:1)(brC20:0)mix          | EPC   | DOPE     | 1.5   | 1.5 | 2     | 3.0  | 462         | 0.4             | 468         | 0.3         |
| Exp17_24 | mix (br20:0)(18:1)EPC/Chol     | (C18:1)(brC20:0)mix          | EPC   | DOPE     | 1.5   | 1.5 | 2     | 5.0  | 462         | 0.4             | 798         | 0.3         |
| Exp17_25 | mix (br20:0)(18:1)EPC/Chol     | (C18:1)(brC20:0)mix          | EPC   | DOPE     | 1.5   | 1.5 | 2     | 10.0 | 462         | 0.4             | 5409        | 0.4         |
| Exp17_26 | mix (br20:0)(18:1)EPC/Chol     | (C18:1)(brC20:0)mix          | EPC   | chol     | 1.5   | 1.5 | 2     | 0.5  | 319         | 0.4             | 251         | 0.3         |
| Exp17_27 | mix (br20:0)(18:1)EPC/Chol     | (C18:1)(brC20:0)mix          | EPC   | chol     | 1.5   | 1.5 | 2     | 1.5  | 319         | 0.4             | 301         | 0.2         |
| Exp17_28 | mix (br20:0)(18:1)EPC/Chol     | (C18:1)(brC20:0)mix          | EPC   | chol     | 1.5   | 1.5 | 2     | 3.0  | 319         | 0.4             | 8004        | 0.3         |
| Exp17_29 | mix (br20:0)(18:1)EPC/Chol     | (C18:1)(brC20:0)mix          | EPC   | chol     | 1.5   | 1.5 | 2     | 5.0  | 319         | 0.4             | 1745        | 0.4         |
| Exp17_30 | mix (br20:0)(18:1)EPC/Chol     | (C18:1)(brC20:0)mix          | EPC   | chol     | 1.5   | 1.5 | 2     | 10.0 | 319         | 0.4             | 264         | 0.2         |

**Table S2: SAXD data**

The column headings are: Experiment label; Formulation label used as the experiments were conducted; Identity of the pyridinium lipid if present (Cat A); Identity of the other cationic lipid (Cat B); Identity of the co-lipid (Co-lipid); three columns giving the molar ratio of Cat A: CatB:Co-lipid; Charge ratio of the experiment (CR) as the ratio of N/P cationic lipid:DNA phosphate; SAXD phase observed; lattice parameter of the phase (Å)

| Label    | Formulation labels | Cat A     | Cat B | Co-lipid | mol Cat A | mol Cat B | mol Co | CR   | SAXS phase    | lattice parameter |
|----------|--------------------|-----------|-------|----------|-----------|-----------|--------|------|---------------|-------------------|
| Exp1_1   | D16:0/EPC/DOPE     | diC16:0   | EPC   | DOPE     | 15        | 15        | 2      | 0.5  | hexagonal     | 70                |
| Exp1_2   | D16:0/EPC/DOPE     | diC16:0   | EPC   | DOPE     | 15        | 15        | 2      | 1.5  | hexagonal     | 70                |
| Exp1_3   | D16:0/EPC/DOPE     | diC16:0   | EPC   | DOPE     | 15        | 15        | 2      | 3.0  | hexagonal     | 70                |
| Exp1_4   | D16:0/EPC/DOPE     | diC16:0   | EPC   | DOPE     | 15        | 15        | 2      | 5.0  | hexagonal     | 70                |
| Exp1_5   | D16:0/EPC/DOPE     | diC16:0   | EPC   | DOPE     | 15        | 15        | 2      | 10.0 | hexagonal     | 70                |
| Exp1_6   | D16:1/EPC/DOPE     | diC16:1   | EPC   | DOPE     | 15        | 15        | 2      | 0.5  | hexagonal     | 65                |
| Exp1_7   | D16:1/EPC/DOPE     | diC16:1   | EPC   | DOPE     | 15        | 15        | 2      | 1.5  | hexagonal     | 65                |
| Exp1_8   | D16:1/EPC/DOPE     | diC16:1   | EPC   | DOPE     | 15        | 15        | 2      | 3.0  | hexagonal     | 65                |
| Exp1_9   | D16:1/EPC/DOPE     | diC16:1   | EPC   | DOPE     | 15        | 15        | 2      | 5.0  | hexagonal     | 65                |
| Exp1_10  | D16:1/EPC/DOPE     | diC16:1   | EPC   | DOPE     | 15        | 15        | 2      | 10.0 | hexagonal     | 65                |
| Exp1_16  | D16:0/EPC/Chol     | diC16:0   | EPC   | chol     | 15        | 15        | 2      | 0.5  | ND            | ND                |
| Exp1_17  | D16:0/EPC/Chol     | diC16:0   | EPC   | chol     | 15        | 15        | 2      | 1.5  | ND            | ND                |
| Exp1_18  | D16:0/EPC/Chol     | diC16:0   | EPC   | chol     | 15        | 15        | 2      | 3.0  | ND            | ND                |
| Exp1_19  | D16:0/EPC/Chol     | diC16:0   | EPC   | chol     | 15        | 15        | 2      | 5.0  | ND            | ND                |
| Exp1_20  | D16:0/EPC/Chol     | diC16:0   | EPC   | chol     | 15        | 15        | 2      | 10.0 | ND            | ND                |
| Exp1_21  | D16:1/EPC/Chol     | diC16:1   | EPC   | chol     | 15        | 15        | 2      | 0.5  | hexagonal     | 71                |
| Exp1_22  | D16:1/EPC/Chol     | diC16:1   | EPC   | chol     | 15        | 15        | 2      | 1.5  | hexagonal     | 71                |
| Exp1_23  | D16:1/EPC/Chol     | diC16:1   | EPC   | chol     | 15        | 15        | 2      | 3.0  | hexagonal     | 71                |
| Exp1_24  | D16:1/EPC/Chol     | diC16:1   | EPC   | chol     | 15        | 15        | 2      | 5.0  | hexagonal     | 71                |
| Exp1_25  | D16:1/EPC/Chol     | diC16:1   | EPC   | chol     | 15        | 15        | 2      | 10.0 | hexagonal     | 71                |
| Exp7_2   | diC12:0/EPC/DOPE   | diC12:0   | EPC   | DOPE     | 15        | 15        | 2      | 3.0  | hexagonal     | 60-62             |
| Exp7_2x  | diC12:0/EPC/DOPE   | diC12:0   | EPC   | DOPE     | 15        | 15        | 2      | 1.5  | hexagonal?    | 63                |
| Exp7_3   | diC14:0/EPC/DOPE   | diC14:0   | EPC   | DOPE     | 15        | 15        | 2      | 3.0  | hexagonal?    | 64                |
| Exp7_3x  | diC14:0/EPC/DOPE   | diC14:0   | EPC   | DOPE     | 15        | 15        | 2      | 1.5  | hexagonal?    | 69                |
| Exp7_4   | diC16:0/EPC/DOPE   | diC16:0   | EPC   | DOPE     | 15        | 15        | 2      | 3.0  | indeterminate | na                |
| Exp7_4x  | diC16:0/EPC/DOPE   | diC16:0   | EPC   | DOPE     | 15        | 15        | 2      | 1.5  | hexagonal     | 68                |
| Exp7_5   | diC18:0/EPC/DOPE   | diC18:0   | EPC   | DOPE     | 15        | 15        | 2      | 3.0  | hexagonal?    | 73                |
| Exp7_5x  | diC18:0/EPC/DOPE   | diC18:0   | EPC   | DOPE     | 15        | 15        | 2      | 1.5  | hexagonal     | 76-84             |
| Exp7_6   | diC18:1/EPC/DOPE   | diC18:1   | EPC   | DOPE     | 15        | 15        | 2      | 3.0  | no XRD        | 68                |
| Exp7_6x  | diC18:1/EPC/DOPE   | diC18:1   | EPC   | DOPE     | 15        | 15        | 2      | 1.5  | hexagonal     |                   |
| Exp7_7   | diC20:0/EPC/DOPE   | diC20:0   | EPC   | DOPE     | 15        | 15        | 2      | 3.0  | no XRD        |                   |
| Exp7_7x  | diC20:0/EPC/DOPE   | diC20:0   | EPC   | DOPE     | 15        | 15        | 2      | 1.5  | no XRD        |                   |
| Exp7_13  | diC12:0/EPC/choh   | diC12:0   | EPC   | chol     | 15        | 15        | 2      | 3.0  | hexagonal?    | 84                |
| Exp7_13x | diC12:0/EPC/choh   | diC12:0   | EPC   | chol     | 15        | 15        | 2      | 1.5  | hexagonal?    | 80                |
| Exp7_14  | diC14:0/EPC/choh   | diC14:0   | EPC   | chol     | 15        | 15        | 2      | 3.0  | indeterminate | na                |
| Exp7_14x | diC14:0/EPC/choh   | diC14:0   | EPC   | chol     | 15        | 15        | 2      | 1.5  | hexagonal     | 84                |
| Exp7_15  | diC16:0/EPC/choh   | diC16:0   | EPC   | chol     | 15        | 15        | 2      | 3.0  | hexagonal     | 82                |
| Exp7_15x | diC16:0/EPC/choh   | diC16:0   | EPC   | chol     | 15        | 15        | 2      | 1.5  | hexagonal?    | 75-90             |
| Exp7_16  | diC18:0/EPC/choh   | diC18:0   | EPC   | chol     | 15        | 15        | 2      | 3.0  | lamellar      | 70                |
| Exp7_16x | diC18:0/EPC/choh   | diC18:0   | EPC   | chol     | 15        | 15        | 2      | 1.5  | indeterminate | na                |
| Exp7_17  | diC18:1/EPC/choh   | diC18:1   | EPC   | chol     | 15        | 15        | 2      | 3.0  | indeterminate | na                |
| Exp7_17x | diC18:1/EPC/choh   | diC18:1   | EPC   | chol     | 15        | 15        | 2      | 1.5  | hexagonal     | 82                |
| Exp7_18  | diC20:0/EPC/choh   | diC20:0   | EPC   | chol     | 15        | 15        | 2      | 3.0  | indeterminate | na                |
| Exp7_18x | diC20:0/EPC/choh   | diC20:0   | EPC   | chol     | 15        | 15        | 2      | 1.5  | indeterminate | na                |
| Exp8_7   | D19:0/EPC/DOPE     | diC9:0    | EPC   | DOPE     | 15        | 15        | 2      | 1.5  | lamellar      | 63                |
| Exp8_12  | Diiso9:0/EPC/DOPE  | diisoC9:0 | EPC   | DOPE     | 15        | 15        | 2      | 1.5  | hexagonal     | 68                |
| Exp8_18  | Di br20:0/EPC/DOPE | diC20:0   | EPC   | DOPE     | 15        | 15        | 2      | 3.0  | hexagonal     | 64                |
| Exp8_23  | Di br20:0/EPC/DOPE | diC20:0   | EPC   | DOPE     | 15        | 15        | 2      | 3.0  | hexagonal     | 68                |
| Exp8a_7  | Di9:0/EPC/choh     | diC9:0    | EPC   | chol     | 15        | 15        | 2      | 1.5  | lamellar      | 68                |
| Exp8a_12 | Diiso9:0/EPC/choh  | diisoC9:0 | EPC   | chol     | 15        | 15        | 2      | 1.5  | lamellar      | 66-85             |
| Exp8a_18 | Di20:0/EPC/choh    | diC20:0   | EPC   | chol     | 15        | 15        | 2      | 3.0  | lamellar      | 71                |
| Exp8a_23 | Di br20:0/EPC/choh | diC20:0   | EPC   | chol     | 15        | 15        | 2      | 3.0  | lamellar      | 70                |

**Table S3: Transfection and cell viability data**

The column headings are: Experiment label; Formulation label used as the experiments were conducted; Identity of the pyridinium lipid if present (Cat A); Identity of the other cationic lipid (Cat B); Identity of the co-lipid (Co-lipid); three columns giving the molar ratio of Cat A: CatB:Co-lipid; Charge ratio of the experiment (CR) as the ratio of N/P cationic lipid:DNA phosphate; Average transfection; Standard error in Transfection; Normalized transfection efficiency based on the efficiency of Lipofetamine = 100 and cells-alone = 0; Average cell viability; Standard deviation in cell viability.

| Label   | Formulation labels           | Cat A                 | Cat B | Co-lipid | Cat A mol | Cat B mol | Co mol | CR   | T Avg  | T SE  | TE norm | T SE Norm | Cytr avg | Cytr SD |
|---------|------------------------------|-----------------------|-------|----------|-----------|-----------|--------|------|--------|-------|---------|-----------|----------|---------|
| Exp1_1  | D16:0/EPC/DOPE               | d1C16:0               | EPC   | DOPE     | 15        | 15        | 2      | 0.5  | 58924  | 9136  | 0.152   | 0.031     | 113.9    | 20.8    |
| Exp1_2  | D16:0/EPC/DOPE               | d1C16:0               | EPC   | DOPE     | 15        | 15        | 2      | 1.5  | 68418  | 8538  | 0.189   | 0.031     | 107.7    | 20.4    |
| Exp1_3  | D16:0/EPC/DOPE               | d1C16:0               | EPC   | DOPE     | 15        | 15        | 2      | 3.0  | 88966  | 8925  | 0.267   | 0.036     | 106.3    | 9.8     |
| Exp1_4  | D16:0/EPC/DOPE               | d1C16:0               | EPC   | DOPE     | 15        | 15        | 2      | 5.0  | 121390 | 13363 | 0.392   | 0.051     | 82.8     | 16.8    |
| Exp1_5  | D16:0/EPC/DOPE               | d1C16:0               | EPC   | DOPE     | 15        | 15        | 2      | 10.0 | 86290  | 12856 | 0.257   | 0.045     | 75.7     | 17.6    |
| Exp1_6  | D16:0/EPC/DOPE               | d1C16:1               | EPC   | DOPE     | 15        | 15        | 2      | 0.5  | 39649  | 5175  | 0.078   | 0.018     | 139.4    | 11.6    |
| Exp1_7  | D16:0/EPC/DOPE               | d1C16:1               | EPC   | DOPE     | 15        | 15        | 2      | 1.5  | 51208  | 6679  | 0.122   | 0.024     | 119.5    | 18.1    |
| Exp1_8  | D16:0/EPC/DOPE               | d1C16:1               | EPC   | DOPE     | 15        | 15        | 2      | 3.0  | 58884  | 1996  | 0.152   | 0.036     | 117.8    | 17.6    |
| Exp1_9  | D16:0/EPC/DOPE               | d1C16:1               | EPC   | DOPE     | 15        | 15        | 2      | 5.0  | 64384  | 8681  | 0.173   | 0.031     | 109.1    | 13.2    |
| Exp1_10 | D16:0/EPC/DOPE               | d1C16:1               | EPC   | DOPE     | 15        | 15        | 2      | 10.0 | 54714  | 2915  | 0.136   | 0.020     | 105.1    | 16.6    |
| Exp1_16 | D16:0/EPC/Chol               | d1C16:0               | EPC   | chol     | 15        | 15        | 2      | 0.5  | 50132  | 5370  | 0.118   | 0.022     | 108.2    | 18.1    |
| Exp1_17 | D16:0/EPC/Chol               | d1C16:0               | EPC   | chol     | 15        | 15        | 2      | 1.5  | 91697  | 7976  | 0.278   | 0.034     | 108.2    | 9.9     |
| Exp1_18 | D16:0/EPC/Chol               | d1C16:0               | EPC   | chol     | 15        | 15        | 2      | 3.0  | 187306 | 18388 | 0.645   | 0.071     | 67.7     | 15.2    |
| Exp1_19 | D16:0/EPC/Chol               | d1C16:0               | EPC   | chol     | 15        | 15        | 2      | 5.0  | 188444 | 38650 | 0.650   | 0.137     | 51.0     | 39.4    |
| Exp1_20 | D16:0/EPC/Chol               | d1C16:0               | EPC   | chol     | 15        | 15        | 2      | 10.0 | 87038  | 18508 | 0.260   | 0.060     | 49.3     | 37.3    |
| Exp1_21 | D16:0/EPC/Chol               | d1C16:1               | EPC   | chol     | 15        | 15        | 2      | 0.5  | 73271  | 9632  | 0.207   | 0.027     | 114.9    | 12.6    |
| Exp1_22 | D16:0/EPC/Chol               | d1C16:1               | EPC   | chol     | 15        | 15        | 2      | 1.5  | 119358 | 10218 | 0.384   | 0.042     | 104.8    | 19.3    |
| Exp1_23 | D16:0/EPC/Chol               | d1C16:1               | EPC   | chol     | 15        | 15        | 2      | 3.0  | 227503 | 19568 | 0.800   | 0.078     | 60.3     | 16.3    |
| Exp1_24 | D16:0/EPC/Chol               | d1C16:1               | EPC   | chol     | 15        | 15        | 2      | 5.0  | 171634 | 14931 | 0.585   | 0.060     | 84.1     | 12.0    |
| Exp1_25 | D16:0/EPC/Chol               | d1C16:1               | EPC   | chol     | 15        | 15        | 2      | 10.0 | 143416 | 13847 | 0.477   | 0.054     | 74.8     | 10.7    |
| Exp1_31 | Lipofectamine                |                       |       |          |           |           |        |      | 279549 | 5866  | 1.000   | 0.047     | 14.8     | 0.3     |
| Exp1_32 | DNA alone                    |                       |       |          |           |           |        |      | 14453  | 4675  | -0.019  | 0.047     | 100.7    | 44.6    |
| Exp1_33 | Cells alone                  |                       |       |          |           |           |        |      | 19371  | 7224  | 0.000   | 0.000     | 100.0    | 48.6    |
| Exp4_6  | (16:0)(11:1)EPC/DOPE         | (16:0)(11:1)mix       | EPC   | DOPE     | 15        | 15        | 2      | 0.5  | 59611  | 8912  | 0.120   | 0.028     | 102.7    | 5.2     |
| Exp4_7  | (16:0)(11:1)EPC/DOPE         | (16:0)(11:1)mix       | EPC   | DOPE     | 15        | 15        | 2      | 1.5  | 66451  | 8148  | 0.134   | 0.025     | 106.4    | 10.3    |
| Exp4_8  | (16:0)(11:1)EPC/DOPE         | (16:0)(11:1)mix       | EPC   | DOPE     | 15        | 15        | 2      | 3.0  | 96917  | 5913  | 0.196   | 0.027     | 85.9     | 4.2     |
| Exp4_9  | (16:0)(11:1)EPC/DOPE         | (16:0)(11:1)mix       | EPC   | DOPE     | 15        | 15        | 2      | 5.0  | 75372  | 20704 | 0.152   | 0.047     | 78.9     | 1.1     |
| Exp4_10 | (16:0)(11:1)EPC/DOPE         | (16:0)(11:1)mix       | EPC   | DOPE     | 15        | 15        | 2      | 10.0 | 57663  | 9746  | 0.117   | 0.029     | 70.3     | 1.9     |
| Exp4_11 | Lipofectamine                |                       |       |          |           |           |        |      | 494825 | 19997 | 1.000   | 0.064     | 10.9     | 0.8     |
| Exp4_12 | DNA alone                    |                       |       |          |           |           |        |      | 18174  | 3328  | 0.037   | 0.017     | 96.7     | 1.0     |
| Exp4_13 | Cells alone                  |                       |       |          |           |           |        |      | 8665   | 9945  | 0.017   | 0.017     | 100.0    | 2.0     |
| Exp7_2  | d1C12:0/EPC/DOPE             | d1C12:0               | EPC   | DOPE     | 15        | 15        | 2      | 3.0  | 445353 | 36644 | 0.893   | 0.078     | 59.1     | 16.2    |
| Exp7_3  | d1C14:0/EPC/DOPE             | d1C14:0               | EPC   | DOPE     | 15        | 15        | 2      | 3.0  | 578507 | 25100 | 0.912   | 0.079     | 58.4     | 2.9     |
| Exp7_4  | d1C16:0/EPC/DOPE             | d1C16:0               | EPC   | DOPE     | 15        | 15        | 2      | 3.0  | 268641 | 52171 | 0.402   | 0.085     | 68.9     | 3.7     |
| Exp7_5  | d1C18:0/EPC/DOPE             | d1C18:0               | EPC   | DOPE     | 15        | 15        | 2      | 3.0  | 201873 | 29951 | 0.293   | 0.051     | 84.5     | 3.6     |
| Exp7_6  | d1C18:0/EPC/DOPE             | d1C18:1               | EPC   | DOPE     | 15        | 15        | 2      | 3.0  | 433876 | 82735 | 0.674   | 0.139     | 70.4     | 10.2    |
| Exp7_7  | d1C20:0/EPC/DOPE             | d1C20:0               | EPC   | DOPE     | 15        | 15        | 2      | 3.0  | 183658 | 46359 | 0.263   | 0.071     | 90.7     | 5.9     |
| Exp7_8  | d1C20:0/EPC/DOPE             | d1C20:0               | EPC   | DOPE     | 15        | 15        | 2      | 3.0  | 434017 | 48869 | 0.674   | 0.092     | 69.2     | 6.7     |
| Exp7_9  | (18:1)(br20:0)EPC Blend50/DO | (18:1)(br20:0)blend50 | EPC   | DOPE     | 15        | 15        | 2      | 3.0  | 432533 | 33231 | 0.672   | 0.073     | 64.9     | 0.8     |
| Exp7_10 | (18:1)(br20:0)EPC Blend66/DO | (18:1)(br20:0)blend66 | EPC   | DOPE     | 15        | 15        | 2      | 3.0  | 519408 | 39770 | 0.814   | 0.088     | 60.1     | 4.7     |
| Exp7_11 | (18:1)(br20:0)EPC Blend85/DO | (18:1)(br20:0)blend85 | EPC   | DOPE     | 15        | 15        | 2      | 3.0  | 409881 | 7975  | 0.634   | 0.050     | 56.0     | 4.0     |
| Exp7_13 | d1C12:0/EPC/Chol             | d1C12:0               | EPC   | chol     | 15        | 15        | 2      | 3.0  | 520807 | 58483 | 0.817   | 0.111     | 62.1     | 8.2     |
| Exp7_14 | d1C14:0/EPC/Chol             | d1C14:0               | EPC   | chol     | 15        | 15        | 2      | 3.0  | 567771 | 50858 | 0.876   | 0.104     | 55.3     | 0.3     |
| Exp7_15 | d1C16:0/EPC/Chol             | d1C16:0               | EPC   | chol     | 15        | 15        | 2      | 3.0  | 467554 | 3256  | 0.729   | 0.056     | 65.0     | 8.5     |
| Exp7_16 | d1C18:0/EPC/Chol             | d1C18:0               | EPC   | chol     | 15        | 15        | 2      | 3.0  | 389694 | 44352 | 0.568   | 0.081     | 50.0     | 6.0     |
| Exp7_17 | d1C18:0/EPC/Chol             | d1C18:1               | EPC   | chol     | 15        | 15        | 2      | 3.0  | 674285 | 64699 | 1.069   | 0.130     | 37.4     | 1.1     |
| Exp7_18 | d1C20:0/EPC/Chol             | d1C20:0               | EPC   | chol     | 15        | 15        | 2      | 3.0  | 498928 | 19661 | 0.782   | 0.067     | 56.8     | 3.9     |
| Exp7_23 | Lipo+DNA                     |                       |       |          |           |           |        |      | 632277 | 44732 | 1.000   | 0.103     | 40.8     | 5.7     |
| Exp7_24 | DNA alone                    |                       |       |          |           |           |        |      | 61956  | 22682 | 0.062   | 0.062     | 91.1     | 1.0     |
| Exp7_25 | Cells alone                  |                       |       |          |           |           |        |      | 23842  | 10593 | 0.000   | 0.000     | 100.0    | 1.5     |
| Exp8_6  | D19:0/EPC/DOPE               | d1C19:0               | EPC   | DOPE     | 15        | 15        | 2      | 0.5  | 161269 | 6833  | 0.392   | 0.018     | 86.4     | 9.6     |
| Exp8_7  | D19:0/EPC/DOPE               | d1C19:0               | EPC   | DOPE     | 15        | 15        | 2      | 1.5  | 203491 | 8343  | 0.497   | 0.023     | 76.9     | 10.8    |

| Label    | Formulation labels              | Cat A                 | Cat B | Co-lipid | Cat A | mol | Cat B | mol | Co   | CR     | T Avg | T SE  | TE    | Norm  | Cyt avg | Cyt SD |
|----------|---------------------------------|-----------------------|-------|----------|-------|-----|-------|-----|------|--------|-------|-------|-------|-------|---------|--------|
| Exp7_19  | diCbr20:0/EPC/choh              | diCbr20:0             | EPC   | choh     | 15    | 15  | 2     | 2   | 3.0  | 573175 | 53795 | 0.108 | 0.903 | 0.108 | 39.3    | 6.5    |
| Exp7_20  | (18:1)(br20:0)/EPC Blend50/choh | (18:1)(br20:0)blend50 | EPC   | choh     | 15    | 15  | 2     | 2   | 3.0  | 759474 | 26750 | 0.089 | 1.209 | 0.089 | 35.7    | 4.5    |
| Exp7_21  | (18:1)(br20:0)/EPC Blend66/choh | (18:1)(br20:0)blend66 | EPC   | choh     | 15    | 15  | 2     | 2   | 3.0  | 497548 | 86312 | 0.147 | 0.779 | 0.147 | 55.2    | 7.5    |
| Exp7_22  | (18:1)(br20:0)/EPC Blend85/choh | (18:1)(br20:0)blend85 | EPC   | choh     | 15    | 15  | 2     | 2   | 3.0  | 653813 | 76932 | 0.144 | 1.035 | 0.144 | 46.1    | 5.2    |
| Exp8_8   | Di9:0EPC/DOPE                   | diC9:0                | EPC   | DOPE     | 15    | 15  | 2     | 2   | 3.0  | 204182 | 6320  | 0.018 | 0.499 | 0.018 | 69.7    | 1.9    |
| Exp8_9   | Di9:0EPC/DOPE                   | diC9:0                | EPC   | DOPE     | 15    | 15  | 2     | 2   | 5.0  | 214562 | 4687  | 0.016 | 0.525 | 0.016 | 65.4    | 1.6    |
| Exp8_10  | Di9:0EPC/DOPE                   | diC9:0                | EPC   | DOPE     | 15    | 15  | 2     | 2   | 10.0 | 84854  | 16850 | 0.040 | 0.202 | 0.040 | 43.1    | 4.8    |
| Exp8_11  | Diiso9:0EPC/DOPE                | diisoC9:0             | EPC   | DOPE     | 15    | 15  | 2     | 2   | 0.5  | 185653 | 4153  | 0.014 | 0.453 | 0.014 | 82.0    | 0.8    |
| Exp8_12  | Diiso9:0EPC/DOPE                | diisoC9:0             | EPC   | DOPE     | 15    | 15  | 2     | 2   | 1.5  | 401669 | 15478 | 0.043 | 0.990 | 0.043 | 30.8    | 2.0    |
| Exp8_13  | Diiso9:0EPC/DOPE                | diisoC9:0             | EPC   | DOPE     | 15    | 15  | 2     | 2   | 3.0  | 22191  | 816   | 0.002 | 0.046 | 0.002 | 13.8    | 0.5    |
| Exp8_14  | Diiso9:0EPC/DOPE                | diisoC9:0             | EPC   | DOPE     | 15    | 15  | 2     | 2   | 5.0  | 70734  | 21743 | 0.051 | 0.167 | 0.051 | 8.8     | 0.5    |
| Exp8_15  | Diiso9:0EPC/DOPE                | diisoC9:0             | EPC   | DOPE     | 15    | 15  | 2     | 2   | 10.0 | 20538  | 9035  | 0.042 | 0.018 | 0.042 | 6.7     | 0.2    |
| Exp8_16  | Di20:0EPC/DOPE                  | diC20:0               | EPC   | DOPE     | 15    | 15  | 2     | 2   | 0.5  | 12421  | 1847  | 0.022 | 0.003 | 0.022 | 79.4    | 3.2    |
| Exp8_17  | Di20:0EPC/DOPE                  | diC20:0               | EPC   | DOPE     | 15    | 15  | 2     | 2   | 1.5  | 13362  | 2772  | 0.024 | 0.024 | 0.024 | 84.7    | 4.0    |
| Exp8_18  | Di20:0EPC/DOPE                  | diC20:0               | EPC   | DOPE     | 15    | 15  | 2     | 2   | 3.0  | 83495  | 4318  | 0.011 | 0.199 | 0.011 | 89.2    | 3.3    |
| Exp8_19  | Di20:0EPC/DOPE                  | diC20:0               | EPC   | DOPE     | 15    | 15  | 2     | 2   | 5.0  | 44028  | 968   | 0.003 | 0.100 | 0.003 | 58.5    | 2.9    |
| Exp8_20  | Di20:0EPC/DOPE                  | diC20:0               | EPC   | DOPE     | 15    | 15  | 2     | 2   | 10.0 | 52854  | 8504  | 0.020 | 0.122 | 0.020 | 39.5    | 3.8    |
| Exp8_21  | Di br20:0EPC/DOPE               | diC20:0               | EPC   | DOPE     | 15    | 15  | 2     | 2   | 0.5  | 81336  | 5402  | 0.013 | 0.193 | 0.013 | 93.3    | 0.7    |
| Exp8_22  | Di br20:0EPC/DOPE               | diC20:0               | EPC   | DOPE     | 15    | 15  | 2     | 2   | 1.5  | 154651 | 3329  | 0.011 | 0.376 | 0.011 | 84.4    | 3.4    |
| Exp8_23  | Di br20:0EPC/DOPE               | diC20:0               | EPC   | DOPE     | 15    | 15  | 2     | 2   | 3.0  | 161748 | 14114 | 0.035 | 0.035 | 0.035 | 77.6    | 4.8    |
| Exp8_24  | Di br20:0EPC/DOPE               | diC20:0               | EPC   | DOPE     | 15    | 15  | 2     | 2   | 5.0  | 219192 | 24047 | 0.060 | 0.536 | 0.060 | 73.6    | 1.5    |
| Exp8_25  | Di br20:0EPC/DOPE               | diC20:0               | EPC   | DOPE     | 15    | 15  | 2     | 2   | 10.0 | 248256 | 3935  | 0.016 | 0.608 | 0.016 | 51.3    | 3.2    |
| Exp8_26  | Lipo+DMA                        |                       |       |          |       |     |       |     |      | 405616 | 8128  | 1.000 | 1.000 | 0.028 | 26.3    | 1.5    |
| Exp8_27  | DNA alone                       |                       |       |          |       |     |       |     |      | 11350  | 2003  |       | 0.019 |       | 88.7    | 4.0    |
| Exp8_28  | Cells alone                     |                       |       |          |       |     |       |     |      | 3700   | 456   |       | 0.000 |       | 100.0   | 3.4    |
| Exp8a_6  | Di9:0EPC/choh                   | diC9:0                | EPC   | choh     | 15    | 15  | 2     | 2   | 0.5  | 39945  | 10322 | 0.094 | 0.000 | 0.024 | 55.5    | 2.8    |
| Exp8a_7  | Di9:0EPC/choh                   | diC9:0                | EPC   | choh     | 15    | 15  | 2     | 2   | 1.5  | 4186   | 511   | 0.000 | 0.000 | 0.000 | 16.4    | 1.1    |
| Exp8a_8  | Di9:0EPC/choh                   | diC9:0                | EPC   | choh     | 15    | 15  | 2     | 2   | 3.0  | 4304   | 836   | 0.001 | 0.001 | 0.000 | 4.7     | 0.1    |
| Exp8a_9  | Di9:0EPC/choh                   | diC9:0                | EPC   | choh     | 15    | 15  | 2     | 2   | 5.0  | 7975   | 128   | 0.010 | 0.010 | 0.002 | 8.1     | 0.4    |
| Exp8a_10 | Di9:0EPC/choh                   | diC9:0                | EPC   | choh     | 15    | 15  | 2     | 2   | 10.0 | 25706  | 2906  | 0.056 | 0.056 | 0.007 | 6.3     | 0.3    |
| Exp8a_11 | Diiso9:0EPC/choh                | diisoC9:0             | EPC   | choh     | 15    | 15  | 2     | 2   | 0.5  | 172545 | 7173  | 0.440 | 0.440 | 0.022 | 25.5    | 0.8    |
| Exp8a_12 | Diiso9:0EPC/choh                | diisoC9:0             | EPC   | choh     | 15    | 15  | 2     | 2   | 1.5  | 20768  | 2250  | 0.044 | 0.044 | 0.005 | 12.1    | 0.8    |
| Exp8a_13 | Diiso9:0EPC/choh                | diisoC9:0             | EPC   | choh     | 15    | 15  | 2     | 2   | 3.0  | 6127   | 672   | 0.002 | 0.002 | 0.000 | 5.3     | 0.1    |
| Exp8a_14 | Diiso9:0EPC/choh                | diisoC9:0             | EPC   | choh     | 15    | 15  | 2     | 2   | 5.0  | 4818   | 133   | 0.002 | 0.002 | 0.000 | 4.8     | 0.3    |
| Exp8a_15 | Diiso9:0EPC/choh                | diisoC9:0             | EPC   | choh     | 15    | 15  | 2     | 2   | 10.0 | 4604   | 667   | 0.001 | 0.001 | 0.000 | 6.7     | 0.4    |
| Exp8a_16 | Di20:0EPC/choh                  | diC20:0               | EPC   | choh     | 15    | 15  | 2     | 2   | 0.5  | 43583  | 2690  | 0.103 | 0.103 | 0.007 | 88.1    | 1.8    |
| Exp8a_17 | Di20:0EPC/choh                  | diC20:0               | EPC   | choh     | 15    | 15  | 2     | 2   | 1.5  | 123850 | 1939  | 0.313 | 0.313 | 0.010 | 93.9    | 3.2    |
| Exp8a_18 | Di20:0EPC/choh                  | diC20:0               | EPC   | choh     | 15    | 15  | 2     | 2   | 3.0  | 178468 | 5482  | 0.455 | 0.455 | 0.019 | 79.7    | 9.4    |
| Exp8a_19 | Di20:0EPC/choh                  | diC20:0               | EPC   | choh     | 15    | 15  | 2     | 2   | 5.0  | 206353 | 1930  | 0.534 | 0.534 | 0.015 | 78.0    | 4.0    |
| Exp8a_20 | Di20:0EPC/choh                  | diC20:0               | EPC   | choh     | 15    | 15  | 2     | 2   | 10.0 | 208523 | 5286  | 0.528 | 0.528 | 0.020 | 69.6    | 1.4    |
| Exp8a_21 | Di br20:0EPC/choh               | diC20:0               | EPC   | choh     | 15    | 15  | 2     | 2   | 0.5  | 23809  | 4672  | 0.051 | 0.051 | 0.011 | 90.3    | 3.9    |
| Exp8a_22 | Di br20:0EPC/choh               | diC20:0               | EPC   | choh     | 15    | 15  | 2     | 2   | 1.5  | 95793  | 4465  | 0.239 | 0.239 | 0.013 | 81.4    | 2.0    |
| Exp8a_23 | Di br20:0EPC/choh               | diC20:0               | EPC   | choh     | 15    | 15  | 2     | 2   | 3.0  | 196281 | 11385 | 0.502 | 0.502 | 0.032 | 47.2    | 4.3    |
| Exp8a_24 | Di br20:0EPC/choh               | diC20:0               | EPC   | choh     | 15    | 15  | 2     | 2   | 5.0  | 259709 | 8120  | 0.667 | 0.667 | 0.028 | 40.5    | 6.3    |
| Exp8a_25 | Di br20:0EPC/choh               | diC20:0               | EPC   | choh     | 15    | 15  | 2     | 2   | 10.0 | 239287 | 10672 | 0.614 | 0.614 | 0.032 | 52.9    | 2.3    |
| Exp8a_26 | Lipo+DMA                        |                       |       |          |       |     |       |     |      | 387139 | 10186 | 1.000 | 1.000 | 0.037 | 17.8    | 2.9    |
| Exp8a_27 | DNA alone                       |                       |       |          |       |     |       |     |      | 25224  | 1319  |       | 0.055 |       | 94.4    | 8.1    |
| Exp8a_28 | Cells alone                     |                       |       |          |       |     |       |     |      | 10983  | 1187  |       | 0.018 |       | 100.0   | 5.3    |
| Exp9_4   | (18:1)(br20:0)blend50/EPC/DOF   | (18:1)(br20:0)blend50 | EPC   | DOPE     | 15    | 15  | 2     | 2   | 1.5  | 344403 | 61299 | 0.455 | 0.455 | 0.088 | 85.6    | 10.9   |
| Exp9_5   | (18:1)(br20:0)blend50/EPC/DOF   | (18:1)(br20:0)blend50 | EPC   | DOPE     | 15    | 15  | 2     | 2   | 5.0  | 325691 | 3488  | 0.428 | 0.428 | 0.034 | 100.1   | 2.5    |
| Exp9_6   | (18:1)(br20:0)blend50/EPC/DOF   | (18:1)(br20:0)blend50 | EPC   | DOPE     | 15    | 15  | 2     | 2   | 10.0 | 329337 | 25080 | 0.434 | 0.434 | 0.047 | 86.6    | 4.0    |
| Exp9_7   | (18:1)(br20:0)blend66/EPC/DOF   | (18:1)(br20:0)blend66 | EPC   | DOPE     | 15    | 15  | 2     | 2   | 1.5  | 286877 | 13958 | 0.372 | 0.372 | 0.036 | 102.0   | 1.4    |
| Exp9_8   | (18:1)(br20:0)blend66/EPC/DOF   | (18:1)(br20:0)blend66 | EPC   | DOPE     | 15    | 15  | 2     | 2   | 5.0  | 415016 | 34365 | 0.557 | 0.557 | 0.060 | 87.7    | 4.7    |

| Label    | Formulation labels            | Cat A                        | Cat B | Co-lipid | mol Cat A | mol Cat B | mol | CR   | T Avg  | T SE  | TE norm | T SE Norm | Cyt avg | Cyt SD |
|----------|-------------------------------|------------------------------|-------|----------|-----------|-----------|-----|------|--------|-------|---------|-----------|---------|--------|
| Exp9_9   | (18:1)(br20:0)blend66/EPC/DOF | (18:1)(br20:0)blend66        | EPC   | DOPE     | 15        | 15        | 2   | 10.0 | 422258 | 66717 | 0.567   | 0.097     | 78.6    | 8.9    |
| Exp9_10  | (18:1)(br20:0)blend85/EPC/DOF | (18:1)(br20:0)blend85        | EPC   | DOPE     | 15        | 15        | 2   | 1.5  | 235546 | 10033 | 0.299   | 0.032     | 93.7    | 2.8    |
| Exp9_11  | (18:1)(br20:0)blend85/EPC/DOF | (18:1)(br20:0)blend85        | EPC   | DOPE     | 15        | 15        | 2   | 5.0  | 357239 | 17864 | 0.474   | 0.042     | 76.8    | 16.8   |
| Exp9_12  | (18:1)(br20:0)blend85/EPC/DOF | (18:1)(br20:0)blend85        | EPC   | DOPE     | 15        | 15        | 2   | 10.0 | 403305 | 61858 | 0.540   | 0.091     | 66.4    | 3.5    |
| Exp9_16  | (18:1)(br20:0)blend50/EPC/Cho | (18:1)(br20:0)blend50        | EPC   | chol     | 15        | 15        | 2   | 1.5  | 379126 | 21140 | 0.505   | 0.046     | 82.9    | 7.5    |
| Exp9_17  | (18:1)(br20:0)blend50/EPC/Cho | (18:1)(br20:0)blend50        | EPC   | chol     | 15        | 15        | 2   | 5.0  | 539314 | 25734 | 0.736   | 0.056     | 66.0    | 2.4    |
| Exp9_18  | (18:1)(br20:0)blend50/EPC/Cho | (18:1)(br20:0)blend50        | EPC   | chol     | 15        | 15        | 2   | 10.0 | 613986 | 54256 | 0.843   | 0.089     | 49.7    | 1.2    |
| Exp9_19  | (18:1)(br20:0)blend66/EPC/Cho | (18:1)(br20:0)blend66        | EPC   | chol     | 15        | 15        | 2   | 1.5  | 264227 | 1275  | 0.340   | 0.031     | 94.9    | 0.6    |
| Exp9_20  | (18:1)(br20:0)blend66/EPC/Cho | (18:1)(br20:0)blend66        | EPC   | chol     | 15        | 15        | 2   | 5.0  | 560840 | 78330 | 0.767   | 0.116     | 51.9    | 10.6   |
| Exp9_21  | (18:1)(br20:0)blend66/EPC/Cho | (18:1)(br20:0)blend66        | EPC   | chol     | 15        | 15        | 2   | 10.0 | 579727 | 57516 | 0.794   | 0.091     | 42.1    | 6.5    |
| Exp9_22  | (18:1)(br20:0)blend85/EPC/Cho | (18:1)(br20:0)blend85        | EPC   | chol     | 15        | 15        | 2   | 1.5  | 407372 | 10155 | 0.546   | 0.040     | 82.7    | 5.2    |
| Exp9_23  | (18:1)(br20:0)blend85/EPC/Cho | (18:1)(br20:0)blend85        | EPC   | chol     | 15        | 15        | 2   | 5.0  | 541839 | 57169 | 0.740   | 0.090     | 48.8    | 3.7    |
| Exp9_24  | (18:1)(br20:0)blend85/EPC/Cho | (18:1)(br20:0)blend85        | EPC   | chol     | 15        | 15        | 2   | 10.0 | 541066 | 14889 | 0.738   | 0.049     | 52.0    | 1.4    |
| Exp9_25  | Lipofectamine                 |                              |       |          |           |           |     |      | 722757 | 27378 | 1.000   | 0.067     | 16.5    | 1.6    |
| Exp9_26  | DNA alone                     |                              |       |          |           |           |     |      | 72649  | 3832  | 0.064   |           | 96.9    | 6.2    |
| Exp9_27  | Cells alone                   |                              |       |          |           |           |     |      | 28223  | 20175 | 0.000   |           | 100.0   | 4.6    |
| Exp17_16 | blend(18:1)(br20:0)32/EPC/Chc | (18:1)(br20:0)blend0.32/0.68 | EPC   | chol     | 15        | 15        | 2   | 0.5  | 98819  | 4171  | 0.156   | 0.013     | 90.1    | 27.4   |
| Exp17_17 | blend(18:1)(br20:0)32/EPC/Chc | (18:1)(br20:0)blend0.32/0.68 | EPC   | chol     | 15        | 15        | 2   | 1.5  | 270250 | 44092 | 0.460   | 0.082     | 84.4    | 29.2   |
| Exp17_18 | blend(18:1)(br20:0)32/EPC/Chc | (18:1)(br20:0)blend0.32/0.68 | EPC   | chol     | 15        | 15        | 2   | 3.0  | 381234 | 12131 | 0.658   | 0.052     | 85.6    | 31.9   |
| Exp17_19 | blend(18:1)(br20:0)32/EPC/Chc | (18:1)(br20:0)blend0.32/0.68 | EPC   | chol     | 15        | 15        | 2   | 5.0  | 294124 | 34942 | 0.502   | 0.070     | 60.6    | 30.8   |
| Exp17_20 | blend(18:1)(br20:0)32/EPC/Chc | (18:1)(br20:0)blend0.32/0.68 | EPC   | chol     | 15        | 15        | 2   | 10.0 | 226004 | 24238 | 0.381   | 0.049     | 65.2    | 28.2   |
| Exp17_26 | mix (br20:0)(18:1)EPC/Chol    | (C18:1)(brC20:0)mix          | EPC   | chol     | 15        | 15        | 2   | 0.5  | 109394 | 13614 | 0.173   | 0.025     | 78.2    | 26.5   |
| Exp17_27 | mix (br20:0)(18:1)EPC/Chol    | (C18:1)(brC20:0)mix          | EPC   | chol     | 15        | 15        | 2   | 1.5  | 250544 | 39980 | 0.424   | 0.074     | 75.0    | 29.1   |
| Exp17_28 | mix (br20:0)(18:1)EPC/Chol    | (C18:1)(brC20:0)mix          | EPC   | chol     | 15        | 15        | 2   | 3.0  | 393463 | 28063 | 0.679   | 0.069     | 3.0     | 10.7   |
| Exp17_29 | mix (br20:0)(18:1)EPC/Chol    | (C18:1)(brC20:0)mix          | EPC   | chol     | 15        | 15        | 2   | 5.0  | 432762 | 28254 | 0.750   | 0.073     | 11.8    | 12.1   |
| Exp17_30 | mix (br20:0)(18:1)EPC/Chol    | (C18:1)(brC20:0)mix          | EPC   | chol     | 15        | 15        | 2   | 10.0 | 294897 | 10545 | 0.504   | 0.041     | 14.6    | 10.8   |
| Exp17_11 | blend(18:1)(br20:0)32/EPC/Chc | (18:1)(br20:0)blend0.32/0.68 | EPC   | DOPE     | 15        | 15        | 2   | 0.5  | 94530  | 5107  | 0.146   | 0.014     | 86.0    | 33.2   |
| Exp17_12 | blend(18:1)(br20:0)32/EPC/Chc | (18:1)(br20:0)blend0.32/0.68 | EPC   | DOPE     | 15        | 15        | 2   | 1.5  | 105110 | 5584  | 0.165   | 0.015     | 81.0    | 31.3   |
| Exp17_13 | blend(18:1)(br20:0)32/EPC/Chc | (18:1)(br20:0)blend0.32/0.68 | EPC   | DOPE     | 15        | 15        | 2   | 3.0  | 122005 | 8362  | 0.195   | 0.020     | 82.5    | 28.1   |
| Exp17_14 | blend(18:1)(br20:0)32/EPC/Chc | (18:1)(br20:0)blend0.32/0.68 | EPC   | DOPE     | 15        | 15        | 2   | 5.0  | 159308 | 14571 | 0.262   | 0.031     | 74.4    | 28.0   |
| Exp17_15 | blend(18:1)(br20:0)32/EPC/Chc | (18:1)(br20:0)blend0.32/0.68 | EPC   | DOPE     | 15        | 15        | 2   | 10.0 | 141009 | 12379 | 0.229   | 0.026     | 83.6    | 32.1   |
| Exp17_21 | mix (br20:0)(18:1)EPC/Chol    | (C18:1)(brC20:0)mix          | EPC   | DOPE     | 15        | 15        | 2   | 0.5  | 73424  | 6318  | 0.108   | 0.012     | 79.8    | 33.6   |
| Exp17_22 | mix (br20:0)(18:1)EPC/Chol    | (C18:1)(brC20:0)mix          | EPC   | DOPE     | 15        | 15        | 2   | 1.5  | 92533  | 8429  | 0.143   | 0.017     | 46.7    | 41.9   |
| Exp17_23 | mix (br20:0)(18:1)EPC/Chol    | (C18:1)(brC20:0)mix          | EPC   | DOPE     | 15        | 15        | 2   | 3.0  | 112667 | 15223 | 0.178   | 0.028     | 0.7     | 8.9    |
| Exp17_24 | mix (br20:0)(18:1)EPC/Chol    | (C18:1)(brC20:0)mix          | EPC   | DOPE     | 15        | 15        | 2   | 5.0  | 94910  | 12318 | 0.147   | 0.022     | 6.1     | 9.6    |
| Exp17_25 | mix (br20:0)(18:1)EPC/Chol    | (C18:1)(brC20:0)mix          | EPC   | DOPE     | 15        | 15        | 2   | 10.0 | 11950  | 6688  | 0.177   | 0.017     | 13.6    | 10.9   |
| Exp17_31 | Lipofectamine                 |                              |       |          |           |           |     |      | 573168 | 41492 | 1.000   | 0.102     | 1.8     | 4.9    |
| Exp17_32 | DNA alone                     |                              |       |          |           |           |     |      | 28890  | 5731  | 0.029   | 0.199     | 95.2    | 15.6   |
| Exp17_33 | Cells alone                   |                              |       |          |           |           |     |      | 12618  | 1813  | 0.000   | 0.145     | 100.0   | 15.8   |



**Table S4: calculated molecular parameters**

| Compound name                | lc<br>Å | a head<br>Å <sup>2</sup> | V tails<br>Å <sup>3</sup> | S    | clogP | ltot<br>Å | Vtot<br>Å <sup>2</sup> | nC   |
|------------------------------|---------|--------------------------|---------------------------|------|-------|-----------|------------------------|------|
| chol                         | 17.4    | 27.5                     | 545                       | 1.14 | 9.9   | 23.3      | 654                    | 14   |
| EPC                          | 17.9    | 54.5                     | 876                       | 0.90 | 9.8   | 26.2      | 1179                   | 12   |
| DOPE                         | 18.7    | 45.4                     | 967                       | 1.14 | 14.8  | 26.3      | 1198                   | 8    |
| diC9:0                       | 10.3    | 42.0                     | 506                       | 1.17 | 5.1   | 17.6      | 712                    | 8    |
| diisoC9:0                    | 7.2     | 42.0                     | 506                       | 1.67 | 4.0   | 14.5      | 712                    | 8    |
| diC11:1                      | 12.0    | 41.9                     | 593                       | 1.18 | 6.3   | 19.3      | 798                    | 8    |
| diC11:0                      | 12.3    | 41.9                     | 614                       | 1.19 | 7.3   | 19.6      | 819                    | 9    |
| diC12:0                      | 13.3    | 41.9                     | 668                       | 1.20 | 8.3   | 20.6      | 872                    | 10   |
| diC14:0                      | 15.3    | 41.8                     | 775                       | 1.21 | 10.5  | 22.6      | 979                    | 12   |
| diC16:0                      | 17.4    | 41.7                     | 883                       | 1.22 | 12.6  | 24.6      | 1086                   | 14   |
| diC16:1                      | 17.4    | 41.7                     | 862                       | 1.19 | 11.6  | 24.6      | 1066                   | 13   |
| diC18:0                      | 19.4    | 41.7                     | 990                       | 1.23 | 14.7  | 26.7      | 1193                   | 16   |
| diC18:1                      | 18.7    | 41.7                     | 969                       | 1.25 | 13.7  | 26.0      | 1173                   | 8    |
| (C16:1)(C11:0)               | 14.7    | 41.8                     | 728                       | 1.19 | 9.4   | 22.0      | 932                    | 11   |
| diC20:0                      | 21.4    | 41.6                     | 1097                      | 1.23 | 16.8  | 28.7      | 1300                   | 18   |
| dibrC20:0                    | 12.3    | 41.6                     | 1108                      | 2.16 | 16.5  | 19.6      | 1311                   | 10   |
| (C16:0)(C11:1)               | 14.7    | 41.8                     | 738                       | 1.20 | 9.4   | 22.0      | 942                    | 11.5 |
| (C18:1)(brC20:0)             | 15.5    | 41.7                     | 1033                      | 1.60 | 15.1  | 22.8      | 1236                   | 9    |
| (16:0)(11:1)mix              | 14.5    | 41.8                     | 722.9                     | 1.2  | 9.2   | 21.8      | 927.1                  | 10.8 |
| diC16:1 mix                  | 17.1    | 41.7                     | 849                       | 1.19 | 11.4  | 24.4      | 1052                   | 12.8 |
| (C18:1)(brC20:0)mix          | 15.1    | 41.7                     | 1044                      | 1.70 | 14.9  | 22.4      | 1247                   | 8.84 |
| (18:1)(br20:0)blend0.32/0.68 | 14.3    | 41.6                     | 1063                      | 1.87 | 15.6  | 21.6      | 1266                   | 9.36 |
| (18:1)(br20:0)blend50        | 15.5    | 41.7                     | 1039                      | 1.70 | 15.1  | 22.8      | 1242                   | 9    |
| (18:1)(br20:0)blend66        | 14.5    | 41.6                     | 1061                      | 1.85 | 15.5  | 21.7      | 1264                   | 9.32 |
| (18:1)(br20:0)blend85        | 13.3    | 41.6                     | 1087                      | 2.03 | 16.1  | 20.5      | 1290                   | 9.7  |

**Table S5: TI<sub>PVM</sub> for experimental mixtures**

The column headings are: Experiment label; Formulation label used as the experiments were conducted; Identity of the pyridinium lipid if present (Cat A); Identity of the other cationic lipid (Cat B); Identity of the co-lipid (Co-lipid); three columns giving the molar ratio of Cat A: CatB:Co-lipid; Charge ration of the experiment (CR) as the ratio of N/P cationic lipid:DNA phosphate;; calculated logP of the mixed lipids; calculated S of the mixed lipids; calculated l<sub>c</sub> of the mixed lipids (Å); calculated volume of the mixed lipids (Å<sup>3</sup>); calculated TI<sub>PVM</sub>; calculated partition term; calculated volume filling term; calculated melting term.

| Label   | Formulation labels      | Cat. A              | Cat B | Co-lipid | Cat A mol | Cat B mol | Co mol | CR   | T Avg  | T SE  | TE norm | T SE norm | C <sub>logP</sub> avg | C <sub>logP</sub> SD |
|---------|-------------------------|---------------------|-------|----------|-----------|-----------|--------|------|--------|-------|---------|-----------|-----------------------|----------------------|
| Exp1_1  | D18:0EPC/DOPE           | d18:0               | EPC   | DOPE     | 15        | 15        | 2      | 0.5  | 58924  | 9136  | 0.152   | 0.030     | 113.9                 | 20.8                 |
| Exp1_2  | D18:0EPC/DOPE           | d18:0               | EPC   | DOPE     | 15        | 15        | 2      | 1.5  | 68418  | 8538  | 0.189   | 0.031     | 107.7                 | 20.4                 |
| Exp1_3  | D18:0EPC/DOPE           | d18:0               | EPC   | DOPE     | 15        | 15        | 2      | 3.0  | 88966  | 8925  | 0.267   | 0.036     | 106.3                 | 9.8                  |
| Exp1_4  | D18:0EPC/DOPE           | d18:0               | EPC   | DOPE     | 15        | 15        | 2      | 5.0  | 121390 | 13363 | 0.392   | 0.051     | 82.8                  | 15.8                 |
| Exp1_5  | D18:0EPC/DOPE           | d18:0               | EPC   | DOPE     | 15        | 15        | 2      | 10.0 | 86290  | 12856 | 0.257   | 0.045     | 75.7                  | 17.6                 |
| Exp1_6  | D18:0EPC/DOPE           | d18:0               | EPC   | DOPE     | 15        | 15        | 2      | 0.5  | 39649  | 5175  | 0.078   | 0.018     | 139.4                 | 11.6                 |
| Exp1_7  | D18:0EPC/DOPE           | d18:0               | EPC   | DOPE     | 15        | 15        | 2      | 1.5  | 51208  | 6679  | 0.122   | 0.024     | 119.5                 | 18.1                 |
| Exp1_8  | D18:0EPC/DOPE           | d18:0               | EPC   | DOPE     | 15        | 15        | 2      | 3.0  | 58884  | 11996 | 0.152   | 0.036     | 117.8                 | 17.6                 |
| Exp1_9  | D18:0EPC/DOPE           | d18:0               | EPC   | DOPE     | 15        | 15        | 2      | 5.0  | 64384  | 8681  | 0.173   | 0.031     | 109.1                 | 13.2                 |
| Exp1_10 | D18:0EPC/DOPE           | d18:0               | EPC   | DOPE     | 15        | 15        | 2      | 10.0 | 54714  | 2915  | 0.136   | 0.020     | 105.1                 | 16.6                 |
| Exp1_16 | D18:0EPC/Chol           | d18:0               | EPC   | chol     | 15        | 15        | 2      | 0.5  | 50132  | 5370  | 0.118   | 0.022     | 108.2                 | 18.1                 |
| Exp1_17 | D18:0EPC/Chol           | d18:0               | EPC   | chol     | 15        | 15        | 2      | 1.5  | 91637  | 7976  | 0.278   | 0.034     | 108.2                 | 9.9                  |
| Exp1_18 | D18:0EPC/Chol           | d18:0               | EPC   | chol     | 15        | 15        | 2      | 3.0  | 187306 | 18388 | 0.645   | 0.071     | 67.7                  | 15.2                 |
| Exp1_19 | D18:0EPC/Chol           | d18:0               | EPC   | chol     | 15        | 15        | 2      | 5.0  | 188444 | 38650 | 0.650   | 0.137     | 51.0                  | 39.4                 |
| Exp1_20 | D18:0EPC/Chol           | d18:0               | EPC   | chol     | 15        | 15        | 2      | 10.0 | 87038  | 19508 | 0.260   | 0.060     | 49.3                  | 37.3                 |
| Exp1_21 | D18:0EPC/Chol           | d18:0               | EPC   | chol     | 15        | 15        | 2      | 0.5  | 73271  | 5632  | 0.207   | 0.027     | 114.9                 | 12.6                 |
| Exp1_22 | D18:0EPC/Chol           | d18:0               | EPC   | chol     | 15        | 15        | 2      | 1.5  | 119358 | 10218 | 0.384   | 0.042     | 104.8                 | 19.3                 |
| Exp1_23 | D18:0EPC/Chol           | d18:0               | EPC   | chol     | 15        | 15        | 2      | 3.0  | 227503 | 19568 | 0.800   | 0.078     | 60.3                  | 16.3                 |
| Exp1_24 | D18:0EPC/Chol           | d18:0               | EPC   | chol     | 15        | 15        | 2      | 5.0  | 171634 | 14831 | 0.585   | 0.060     | 84.1                  | 12.0                 |
| Exp1_25 | D18:0EPC/Chol           | d18:0               | EPC   | chol     | 15        | 15        | 2      | 10.0 | 143416 | 13847 | 0.477   | 0.054     | 74.8                  | 10.7                 |
| Exp1_31 | Lipofectamine           |                     |       |          |           |           |        |      | 279549 | 5866  | 1.000   | 0.047     | 14.8                  | 0.3                  |
| Exp1_32 | DNA alone               |                     |       |          |           |           |        |      | 14453  | 4675  | -0.019  | 0.000     | 100.7                 | 44.6                 |
| Exp1_33 | Cells alone             |                     |       |          |           |           |        |      | 19371  | 7224  | 0.000   | 0.000     | 100.0                 | 48.6                 |
| Exp1_6  | (16:0)(11:1)EPC/DOPE    | (16:0)(11:1)mix     | EPC   | DOPE     | 15        | 15        | 2      | 0.5  | 59611  | 8912  | 0.120   | 0.028     | 102.7                 | 5.2                  |
| Exp1_7  | (16:0)(11:1)EPC/DOPE    | (16:0)(11:1)mix     | EPC   | DOPE     | 15        | 15        | 2      | 1.5  | 66451  | 8148  | 0.134   | 0.027     | 106.4                 | 10.3                 |
| Exp1_8  | (16:0)(11:1)EPC/DOPE    | (16:0)(11:1)mix     | EPC   | DOPE     | 15        | 15        | 2      | 3.0  | 96917  | 5913  | 0.196   | 0.025     | 85.9                  | 4.2                  |
| Exp1_9  | (16:0)(11:1)EPC/DOPE    | (16:0)(11:1)mix     | EPC   | DOPE     | 15        | 15        | 2      | 5.0  | 75372  | 20704 | 0.152   | 0.047     | 78.9                  | 1.1                  |
| Exp1_10 | (16:0)(11:1)EPC/DOPE    | (16:0)(11:1)mix     | EPC   | DOPE     | 15        | 15        | 2      | 10.0 | 57663  | 9746  | 0.117   | 0.029     | 70.3                  | 1.9                  |
| Exp1_11 | Lipofectamine           |                     |       |          |           |           |        |      | 494925 | 19997 | 1.000   | 0.064     | 10.9                  | 0.8                  |
| Exp1_12 | DNA alone               |                     |       |          |           |           |        |      | 18174  | 3328  | 0.037   | 0.000     | 96.7                  | 1.0                  |
| Exp1_13 | Cells alone             |                     |       |          |           |           |        |      | 8565   | 9945  | 0.017   | 0.000     | 100.0                 | 2.0                  |
| Exp7_2  | d18:0EPC/DOPE           | d18:0               | EPC   | DOPE     | 15        | 15        | 2      | 3.0  | 445353 | 36644 | 0.693   | 0.078     | 59.1                  | 16.2                 |
| Exp7_3  | d18:0EPC/DOPE           | d18:0               | EPC   | DOPE     | 15        | 15        | 2      | 3.0  | 578507 | 25100 | 0.912   | 0.079     | 58.4                  | 2.9                  |
| Exp7_4  | d18:0EPC/DOPE           | d18:0               | EPC   | DOPE     | 15        | 15        | 2      | 3.0  | 268641 | 52171 | 0.402   | 0.085     | 68.9                  | 3.7                  |
| Exp7_5  | d18:0EPC/DOPE           | d18:0               | EPC   | DOPE     | 15        | 15        | 2      | 3.0  | 201873 | 23951 | 0.293   | 0.051     | 84.5                  | 3.6                  |
| Exp7_6  | d18:0EPC/DOPE           | d18:0               | EPC   | DOPE     | 15        | 15        | 2      | 3.0  | 433876 | 82735 | 0.674   | 0.139     | 70.4                  | 10.2                 |
| Exp7_7  | d18:0EPC/DOPE           | d18:0               | EPC   | DOPE     | 15        | 15        | 2      | 3.0  | 183658 | 46359 | 0.263   | 0.071     | 90.7                  | 5.9                  |
| Exp7_8  | d18:0EPC/DOPE           | d18:0               | EPC   | DOPE     | 15        | 15        | 2      | 3.0  | 434017 | 48869 | 0.674   | 0.092     | 69.2                  | 6.7                  |
| Exp7_9  | (18:1)(16:0)EPC Blend50 | (18:1)(16:0)blend50 | EPC   | DOPE     | 15        | 15        | 2      | 3.0  | 432533 | 33231 | 0.672   | 0.073     | 64.9                  | 0.8                  |
| Exp7_10 | (18:1)(16:0)EPC Blend66 | (18:1)(16:0)blend66 | EPC   | DOPE     | 15        | 15        | 2      | 3.0  | 519408 | 39770 | 0.814   | 0.088     | 60.1                  | 4.7                  |
| Exp7_11 | (18:1)(16:0)EPC Blend85 | (18:1)(16:0)blend85 | EPC   | DOPE     | 15        | 15        | 2      | 3.0  | 409881 | 7975  | 0.634   | 0.050     | 56.0                  | 4.0                  |
| Exp7_12 | d18:0EPC/Chol           | d18:0               | EPC   | chol     | 15        | 15        | 2      | 3.0  | 520807 | 58483 | 0.817   | 0.111     | 62.1                  | 8.2                  |
| Exp7_13 | d18:0EPC/Chol           | d18:0               | EPC   | chol     | 15        | 15        | 2      | 3.0  | 556771 | 50858 | 0.876   | 0.104     | 55.3                  | 0.3                  |
| Exp7_14 | d18:0EPC/Chol           | d18:0               | EPC   | chol     | 15        | 15        | 2      | 3.0  | 467554 | 3256  | 0.729   | 0.056     | 65.0                  | 8.5                  |
| Exp7_15 | d18:0EPC/Chol           | d18:0               | EPC   | chol     | 15        | 15        | 2      | 3.0  | 369594 | 44352 | 0.568   | 0.081     | 50.0                  | 6.0                  |
| Exp7_16 | d18:0EPC/Chol           | d18:0               | EPC   | chol     | 15        | 15        | 2      | 3.0  | 674285 | 64699 | 1.069   | 0.130     | 37.4                  | 1.1                  |
| Exp7_17 | d18:0EPC/Chol           | d18:0               | EPC   | chol     | 15        | 15        | 2      | 3.0  | 499928 | 19661 | 0.782   | 0.067     | 56.8                  | 3.9                  |
| Exp7_18 | d18:0EPC/Chol           | d18:0               | EPC   | chol     | 15        | 15        | 2      | 3.0  | 632277 | 44732 | 1.000   | 0.103     | 40.8                  | 5.7                  |
| Exp7_23 | Lipo-DNA                |                     |       |          |           |           |        |      | 61596  | 22682 | 0.062   | 0.000     | 91.1                  | 1.0                  |
| Exp7_24 | DNA alone               |                     |       |          |           |           |        |      | 23842  | 10593 | 0.000   | 0.000     | 100.0                 | 1.5                  |
| Exp7_25 | Cells alone             |                     |       |          |           |           |        |      | 161269 | 6833  | 0.392   | 0.018     | 86.4                  | 9.6                  |
| Exp8_6  | D18:0EPC/DOPE           | d18:0               | EPC   | DOPE     | 15        | 15        | 2      | 0.5  | 203491 | 8943  | 0.497   | 0.023     | 76.9                  | 10.8                 |
| Exp8_7  | D18:0EPC/DOPE           | d18:0               | EPC   | DOPE     | 15        | 15        | 2      | 1.5  |        |       |         |           |                       |                      |



| Label    | Formulation labels              | Cat A                 | Cat B | Co-lipid | mol Cat A | mol Cat B | mol Co | CR   | T Avg  | T SE  | TE norm | T SE Norm | Cyt avg | Cyt SD |
|----------|---------------------------------|-----------------------|-------|----------|-----------|-----------|--------|------|--------|-------|---------|-----------|---------|--------|
| Exp7_19  | dibrC20:0/EPC/choh              | dibrC20:0             | EPC   | choh     | 15        | 15        | 2      | 3.0  | 573175 | 53795 | 0.303   | 0.108     | 39.3    | 6.5    |
| Exp7_20  | (18:1)(br20:0)/EPC Blend50/choh | (18:1)(br20:0)blend50 | EPC   | choh     | 15        | 15        | 2      | 3.0  | 759474 | 26750 | 1.209   | 0.099     | 35.7    | 4.5    |
| Exp7_21  | (18:1)(br20:0)/EPC Blend66/choh | (18:1)(br20:0)blend66 | EPC   | choh     | 15        | 15        | 2      | 3.0  | 497548 | 86312 | 0.779   | 0.147     | 55.2    | 7.5    |
| Exp7_22  | (18:1)(br20:0)/EPC Blend85/choh | (18:1)(br20:0)blend85 | EPC   | choh     | 15        | 15        | 2      | 3.0  | 653813 | 76992 | 1.035   | 0.144     | 46.1    | 5.2    |
| Exp8_8   | D19:0/EPC/DOPE                  | d19C9:0               | EPC   | DOPE     | 15        | 15        | 2      | 3.0  | 204182 | 6320  | 0.499   | 0.018     | 69.7    | 1.9    |
| Exp8_9   | D19:0/EPC/DOPE                  | d19C9:0               | EPC   | DOPE     | 15        | 15        | 2      | 5.0  | 214562 | 4687  | 0.525   | 0.016     | 65.4    | 1.6    |
| Exp8_10  | D19:0/EPC/DOPE                  | d19C9:0               | EPC   | DOPE     | 15        | 15        | 2      | 10.0 | 84854  | 16850 | 0.202   | 0.040     | 43.1    | 4.8    |
| Exp8_11  | Di19:0/EPC/DOPE                 | di19C9:0              | EPC   | DOPE     | 15        | 15        | 2      | 0.5  | 185653 | 4153  | 0.453   | 0.014     | 82.0    | 0.8    |
| Exp8_12  | Di19:0/EPC/DOPE                 | di19C9:0              | EPC   | DOPE     | 15        | 15        | 2      | 1.5  | 401669 | 15478 | 0.390   | 0.043     | 30.8    | 2.0    |
| Exp8_13  | Di19:0/EPC/DOPE                 | di19C9:0              | EPC   | DOPE     | 15        | 15        | 2      | 3.0  | 22191  | 816   | 0.046   | 0.002     | 13.8    | 0.5    |
| Exp8_14  | Di19:0/EPC/DOPE                 | di19C9:0              | EPC   | DOPE     | 15        | 15        | 2      | 5.0  | 70734  | 21743 | 0.167   | 0.051     | 8.8     | 0.5    |
| Exp8_15  | Di19:0/EPC/DOPE                 | di19C9:0              | EPC   | DOPE     | 15        | 15        | 2      | 10.0 | 20538  | 9035  | 0.042   | 0.018     | 6.7     | 0.2    |
| Exp8_16  | D120:0/EPC/DOPE                 | d12C20:0              | EPC   | DOPE     | 15        | 15        | 2      | 0.5  | 12421  | 1847  | 0.022   | 0.003     | 79.4    | 3.2    |
| Exp8_17  | D120:0/EPC/DOPE                 | d12C20:0              | EPC   | DOPE     | 15        | 15        | 2      | 1.5  | 13362  | 2772  | 0.024   | 0.005     | 84.7    | 4.0    |
| Exp8_18  | D120:0/EPC/DOPE                 | d12C20:0              | EPC   | DOPE     | 15        | 15        | 2      | 3.0  | 83495  | 4318  | 0.199   | 0.011     | 69.2    | 3.3    |
| Exp8_19  | D120:0/EPC/DOPE                 | d12C20:0              | EPC   | DOPE     | 15        | 15        | 2      | 5.0  | 44028  | 968   | 0.100   | 0.003     | 58.5    | 2.9    |
| Exp8_20  | D120:0/EPC/DOPE                 | d12C20:0              | EPC   | DOPE     | 15        | 15        | 2      | 10.0 | 52854  | 8504  | 0.122   | 0.020     | 39.5    | 3.8    |
| Exp8_21  | Di120:0/EPC/DOPE                | dibrC20:0             | EPC   | DOPE     | 15        | 15        | 2      | 0.5  | 81336  | 5402  | 0.193   | 0.013     | 93.3    | 0.7    |
| Exp8_22  | Di120:0/EPC/DOPE                | dibrC20:0             | EPC   | DOPE     | 15        | 15        | 2      | 1.5  | 154651 | 3329  | 0.376   | 0.011     | 84.4    | 3.4    |
| Exp8_23  | Di120:0/EPC/DOPE                | dibrC20:0             | EPC   | DOPE     | 15        | 15        | 2      | 3.0  | 161748 | 14114 | 0.393   | 0.035     | 77.6    | 4.8    |
| Exp8_24  | Di120:0/EPC/DOPE                | dibrC20:0             | EPC   | DOPE     | 15        | 15        | 2      | 5.0  | 219192 | 24047 | 0.536   | 0.060     | 73.6    | 1.5    |
| Exp8_25  | Di120:0/EPC/DOPE                | dibrC20:0             | EPC   | DOPE     | 15        | 15        | 2      | 10.0 | 248256 | 3935  | 0.608   | 0.016     | 51.3    | 3.2    |
| Exp8_26  | Lipo+DNA                        |                       |       |          |           |           |        |      | 405616 | 8128  | 1.000   | 0.028     | 26.3    | 1.5    |
| Exp8_27  | DNA alone                       |                       |       |          |           |           |        |      | 11350  | 2003  | 0.019   |           | 88.7    | 4.0    |
| Exp8_28  | Cells alone                     |                       |       |          |           |           |        |      | 3700   | 456   | 0.000   |           | 100.0   | 3.4    |
| Exp8a_6  | D19:0/EPC/choh                  | d19C9:0               | EPC   | choh     | 15        | 15        | 2      | 0.5  | 39945  | 10322 | 0.094   | 0.024     | 55.5    | 2.8    |
| Exp8a_7  | D19:0/EPC/choh                  | d19C9:0               | EPC   | choh     | 15        | 15        | 2      | 1.5  | 4186   | 511   | 0.000   | 0.000     | 16.4    | 1.1    |
| Exp8a_8  | D19:0/EPC/choh                  | d19C9:0               | EPC   | choh     | 15        | 15        | 2      | 3.0  | 4304   | 836   | 0.001   | 0.000     | 4.7     | 0.1    |
| Exp8a_9  | D19:0/EPC/choh                  | d19C9:0               | EPC   | choh     | 15        | 15        | 2      | 5.0  | 7975   | 128   | 0.010   | 0.002     | 8.1     | 0.4    |
| Exp8a_10 | D19:0/EPC/choh                  | d19C9:0               | EPC   | choh     | 15        | 15        | 2      | 10.0 | 25706  | 2906  | 0.056   | 0.007     | 6.3     | 0.3    |
| Exp8a_11 | Di19:0/EPC/choh                 | di19C9:0              | EPC   | choh     | 15        | 15        | 2      | 0.5  | 172545 | 7173  | 0.440   | 0.022     | 25.5    | 0.8    |
| Exp8a_12 | Di19:0/EPC/choh                 | di19C9:0              | EPC   | choh     | 15        | 15        | 2      | 1.5  | 20768  | 2250  | 0.044   | 0.005     | 12.1    | 0.8    |
| Exp8a_13 | Di19:0/EPC/choh                 | di19C9:0              | EPC   | choh     | 15        | 15        | 2      | 3.0  | 6127   | 672   | 0.005   | 0.001     | 5.3     | 0.1    |
| Exp8a_14 | Di19:0/EPC/choh                 | di19C9:0              | EPC   | choh     | 15        | 15        | 2      | 5.0  | 4818   | 133   | 0.002   | 0.000     | 4.8     | 0.3    |
| Exp8a_15 | Di19:0/EPC/choh                 | di19C9:0              | EPC   | choh     | 15        | 15        | 2      | 10.0 | 4604   | 667   | 0.001   | 0.000     | 6.7     | 0.4    |
| Exp8a_16 | D120:0/EPC/choh                 | d12C20:0              | EPC   | choh     | 15        | 15        | 2      | 0.5  | 43583  | 2690  | 0.103   | 0.007     | 88.1    | 1.8    |
| Exp8a_17 | D120:0/EPC/choh                 | d12C20:0              | EPC   | choh     | 15        | 15        | 2      | 1.5  | 123850 | 1939  | 0.313   | 0.010     | 93.9    | 3.2    |
| Exp8a_18 | D120:0/EPC/choh                 | d12C20:0              | EPC   | choh     | 15        | 15        | 2      | 3.0  | 178468 | 5482  | 0.455   | 0.019     | 79.7    | 9.4    |
| Exp8a_19 | D120:0/EPC/choh                 | d12C20:0              | EPC   | choh     | 15        | 15        | 2      | 5.0  | 208523 | 1930  | 0.534   | 0.015     | 78.0    | 4.0    |
| Exp8a_20 | D120:0/EPC/choh                 | d12C20:0              | EPC   | choh     | 15        | 15        | 2      | 10.0 | 206353 | 5286  | 0.528   | 0.020     | 69.6    | 1.4    |
| Exp8a_21 | Di120:0/EPC/choh                | dibrC20:0             | EPC   | choh     | 15        | 15        | 2      | 0.5  | 23809  | 4672  | 0.051   | 0.011     | 90.3    | 3.9    |
| Exp8a_22 | Di120:0/EPC/choh                | dibrC20:0             | EPC   | choh     | 15        | 15        | 2      | 1.5  | 95793  | 4485  | 0.239   | 0.013     | 81.4    | 2.0    |
| Exp8a_23 | Di120:0/EPC/choh                | dibrC20:0             | EPC   | choh     | 15        | 15        | 2      | 3.0  | 196281 | 11385 | 0.502   | 0.032     | 47.2    | 4.3    |
| Exp8a_24 | Di120:0/EPC/choh                | dibrC20:0             | EPC   | choh     | 15        | 15        | 2      | 5.0  | 259709 | 8120  | 0.667   | 0.028     | 40.5    | 6.3    |
| Exp8a_25 | Di120:0/EPC/choh                | dibrC20:0             | EPC   | choh     | 15        | 15        | 2      | 10.0 | 239287 | 10672 | 0.614   | 0.032     | 52.9    | 2.3    |
| Exp8a_26 | Lipo+DNA                        |                       |       |          |           |           |        |      | 387139 | 10186 | 1.000   | 0.037     | 17.8    | 2.9    |
| Exp8a_27 | DNA alone                       |                       |       |          |           |           |        |      | 25224  | 1319  | 0.055   |           | 94.4    | 8.1    |
| Exp8a_28 | Cells alone                     |                       |       |          |           |           |        |      | 10983  | 187   | 0.018   |           | 100.0   | 5.3    |
| Exp9_4   | (18:1)(br20:0)blend50/EPC/DOF   | (18:1)(br20:0)blend50 | EPC   | DOPE     | 15        | 15        | 2      | 1.5  | 344403 | 61299 | 0.455   | 0.088     | 85.6    | 10.9   |
| Exp9_5   | (18:1)(br20:0)blend50/EPC/DOF   | (18:1)(br20:0)blend50 | EPC   | DOPE     | 15        | 15        | 2      | 5.0  | 325691 | 3488  | 0.428   | 0.034     | 100.1   | 2.5    |
| Exp9_6   | (18:1)(br20:0)blend50/EPC/DOF   | (18:1)(br20:0)blend50 | EPC   | DOPE     | 15        | 15        | 2      | 10.0 | 329937 | 25080 | 0.434   | 0.047     | 86.6    | 4.0    |
| Exp9_7   | (18:1)(br20:0)blend66/EPC/DOF   | (18:1)(br20:0)blend66 | EPC   | DOPE     | 15        | 15        | 2      | 1.5  | 286877 | 13958 | 0.372   | 0.036     | 102.0   | 1.4    |
| Exp9_8   | (18:1)(br20:0)blend66/EPC/DOF   | (18:1)(br20:0)blend66 | EPC   | DOPE     | 15        | 15        | 2      | 5.0  | 415016 | 34365 | 0.557   | 0.060     | 87.7    | 4.7    |

| Label    | Formulation labels            | Cat A                        | Cat B | Co-<br>lipid | mol   |       | CR   | T Avg  | T SE  | TE<br>norm | T SE<br>Norm | Cyt avg | Cyt SD |
|----------|-------------------------------|------------------------------|-------|--------------|-------|-------|------|--------|-------|------------|--------------|---------|--------|
|          |                               |                              |       |              | Cat A | Cat B |      |        |       |            |              |         |        |
| Exp9_9   | (18:1)(br20:0)blend66/EPC/DOF | (18:1)(br20:0)blend66        | EPC   | DOPE         | 15    | 15    | 10.0 | 422258 | 66717 | 0.567      | 0.097        | 78.6    | 8.9    |
| Exp9_10  | (18:1)(br20:0)blend85/EPC/DOF | (18:1)(br20:0)blend85        | EPC   | DOPE         | 15    | 15    | 2    | 235546 | 10033 | 0.299      | 0.032        | 93.7    | 2.8    |
| Exp9_11  | (18:1)(br20:0)blend85/EPC/DOF | (18:1)(br20:0)blend85        | EPC   | DOPE         | 15    | 15    | 2    | 357239 | 17864 | 0.474      | 0.042        | 76.8    | 16.8   |
| Exp9_12  | (18:1)(br20:0)blend85/EPC/DOF | (18:1)(br20:0)blend85        | EPC   | DOPE         | 15    | 15    | 2    | 403305 | 61858 | 0.540      | 0.091        | 66.4    | 3.5    |
| Exp9_16  | (18:1)(br20:0)blend50/EPC/Cho | (18:1)(br20:0)blend50        | EPC   | chol         | 15    | 15    | 2    | 379126 | 21140 | 0.505      | 0.046        | 82.9    | 7.5    |
| Exp9_17  | (18:1)(br20:0)blend50/EPC/Cho | (18:1)(br20:0)blend50        | EPC   | chol         | 15    | 15    | 2    | 539314 | 25734 | 0.736      | 0.056        | 66.0    | 2.4    |
| Exp9_18  | (18:1)(br20:0)blend50/EPC/Cho | (18:1)(br20:0)blend50        | EPC   | chol         | 15    | 15    | 2    | 613986 | 54256 | 0.843      | 0.089        | 49.7    | 1.2    |
| Exp9_19  | (18:1)(br20:0)blend66/EPC/Cho | (18:1)(br20:0)blend66        | EPC   | chol         | 15    | 15    | 2    | 264227 | 1275  | 0.340      | 0.031        | 94.9    | 0.6    |
| Exp9_20  | (18:1)(br20:0)blend66/EPC/Cho | (18:1)(br20:0)blend66        | EPC   | chol         | 15    | 15    | 2    | 560940 | 78330 | 0.767      | 0.116        | 51.9    | 10.6   |
| Exp9_21  | (18:1)(br20:0)blend66/EPC/Cho | (18:1)(br20:0)blend66        | EPC   | chol         | 15    | 15    | 2    | 579727 | 57516 | 0.794      | 0.091        | 42.1    | 6.5    |
| Exp9_22  | (18:1)(br20:0)blend85/EPC/Cho | (18:1)(br20:0)blend85        | EPC   | chol         | 15    | 15    | 2    | 407372 | 10155 | 0.546      | 0.040        | 82.7    | 5.2    |
| Exp9_23  | (18:1)(br20:0)blend85/EPC/Cho | (18:1)(br20:0)blend85        | EPC   | chol         | 15    | 15    | 2    | 541839 | 57169 | 0.740      | 0.090        | 48.8    | 3.7    |
| Exp9_24  | (18:1)(br20:0)blend85/EPC/Cho | (18:1)(br20:0)blend85        | EPC   | chol         | 15    | 15    | 2    | 541066 | 14889 | 0.738      | 0.049        | 52.0    | 1.4    |
| Exp9_25  | Lipofectamine                 |                              |       |              |       |       |      | 722757 | 27378 | 1.000      | 0.067        | 16.5    | 1.6    |
| Exp9_26  | DNA alone                     |                              |       |              |       |       |      | 72649  | 3632  | 0.064      |              | 96.9    | 6.2    |
| Exp9_27  | Cells alone                   |                              |       |              |       |       |      | 28223  | 20175 | 0.000      |              | 100.0   | 4.6    |
| Exp17_16 | blend(18:1)(br20:0)32/EPC/Chc | (18:1)(br20:0)blend0.32/0.68 | EPC   | chol         | 15    | 15    | 2    | 99819  | 4171  | 0.156      | 0.013        | 90.1    | 27.4   |
| Exp17_17 | blend(18:1)(br20:0)32/EPC/Chc | (18:1)(br20:0)blend0.32/0.68 | EPC   | chol         | 15    | 15    | 2    | 270250 | 44032 | 0.460      | 0.082        | 84.4    | 29.2   |
| Exp17_18 | blend(18:1)(br20:0)32/EPC/Chc | (18:1)(br20:0)blend0.32/0.68 | EPC   | chol         | 15    | 15    | 2    | 381234 | 12131 | 0.658      | 0.052        | 85.6    | 31.9   |
| Exp17_19 | blend(18:1)(br20:0)32/EPC/Chc | (18:1)(br20:0)blend0.32/0.68 | EPC   | chol         | 15    | 15    | 2    | 294124 | 34942 | 0.502      | 0.070        | 60.6    | 30.8   |
| Exp17_20 | blend(18:1)(br20:0)32/EPC/Chc | (18:1)(br20:0)blend0.32/0.68 | EPC   | chol         | 15    | 15    | 2    | 226004 | 24238 | 0.381      | 0.049        | 65.2    | 28.2   |
| Exp17_26 | mix (br20:0)(18:1)EPC/Chol    | (C18:1)(brC20:0)mix          | EPC   | chol         | 15    | 15    | 2    | 109394 | 13614 | 0.173      | 0.025        | 78.2    | 26.5   |
| Exp17_27 | mix (br20:0)(18:1)EPC/Chol    | (C18:1)(brC20:0)mix          | EPC   | chol         | 15    | 15    | 2    | 250544 | 39980 | 0.424      | 0.074        | 75.0    | 29.1   |
| Exp17_28 | mix (br20:0)(18:1)EPC/Chol    | (C18:1)(brC20:0)mix          | EPC   | chol         | 15    | 15    | 2    | 393463 | 28063 | 0.679      | 0.069        | 3.0     | 10.7   |
| Exp17_29 | mix (br20:0)(18:1)EPC/Chol    | (C18:1)(brC20:0)mix          | EPC   | chol         | 15    | 15    | 2    | 432762 | 28254 | 0.750      | 0.073        | 11.8    | 12.1   |
| Exp17_30 | mix (br20:0)(18:1)EPC/Chol    | (C18:1)(brC20:0)mix          | EPC   | chol         | 15    | 15    | 2    | 294697 | 10545 | 0.504      | 0.041        | 14.6    | 10.8   |
| Exp17_11 | blend(18:1)(br20:0)32/EPC/Chc | (18:1)(br20:0)blend0.32/0.68 | EPC   | DOPE         | 15    | 15    | 2    | 94530  | 5107  | 0.146      | 0.014        | 86.0    | 33.2   |
| Exp17_12 | blend(18:1)(br20:0)32/EPC/Chc | (18:1)(br20:0)blend0.32/0.68 | EPC   | DOPE         | 15    | 15    | 2    | 105110 | 5584  | 0.165      | 0.015        | 81.0    | 31.3   |
| Exp17_13 | blend(18:1)(br20:0)32/EPC/Chc | (18:1)(br20:0)blend0.32/0.68 | EPC   | DOPE         | 15    | 15    | 2    | 122005 | 8362  | 0.195      | 0.020        | 82.5    | 28.1   |
| Exp17_14 | blend(18:1)(br20:0)32/EPC/Chc | (18:1)(br20:0)blend0.32/0.68 | EPC   | DOPE         | 15    | 15    | 2    | 159308 | 14571 | 0.262      | 0.031        | 74.4    | 28.0   |
| Exp17_15 | blend(18:1)(br20:0)32/EPC/Chc | (18:1)(br20:0)blend0.32/0.68 | EPC   | DOPE         | 15    | 15    | 2    | 141009 | 12379 | 0.229      | 0.026        | 83.6    | 32.1   |
| Exp17_21 | mix (br20:0)(18:1)EPC/Chol    | (C18:1)(brC20:0)mix          | EPC   | DOPE         | 15    | 15    | 2    | 73424  | 6318  | 0.108      | 0.012        | 79.8    | 33.6   |
| Exp17_22 | mix (br20:0)(18:1)EPC/Chol    | (C18:1)(brC20:0)mix          | EPC   | DOPE         | 15    | 15    | 2    | 92533  | 8429  | 0.143      | 0.017        | 46.7    | 41.9   |
| Exp17_23 | mix (br20:0)(18:1)EPC/Chol    | (C18:1)(brC20:0)mix          | EPC   | DOPE         | 15    | 15    | 2    | 112667 | 15523 | 0.178      | 0.028        | 0.7     | 8.9    |
| Exp17_24 | mix (br20:0)(18:1)EPC/Chol    | (C18:1)(brC20:0)mix          | EPC   | DOPE         | 15    | 15    | 2    | 94910  | 12318 | 0.147      | 0.022        | 6.1     | 9.6    |
| Exp17_25 | mix (br20:0)(18:1)EPC/Chol    | (C18:1)(brC20:0)mix          | EPC   | DOPE         | 15    | 15    | 2    | 11950  | 6688  | 0.177      | 0.017        | 13.6    | 10.9   |
| Exp17_31 | Lipofectamine                 |                              |       |              |       |       |      | 573168 | 41492 | 1.000      | 0.102        | 1.8     | 4.9    |
| Exp17_32 | DNA alone                     |                              |       |              |       |       |      | 28890  | 5731  | 0.029      | 0.199        | 95.2    | 15.6   |
| Exp17_33 | Cells alone                   |                              |       |              |       |       |      | 12618  | 1813  | 0.000      | 0.145        | 100.0   | 15.8   |

## Proton and Carbon NMR spectra

$^1\text{H}$ NMR for compound diC9:0 pyridine

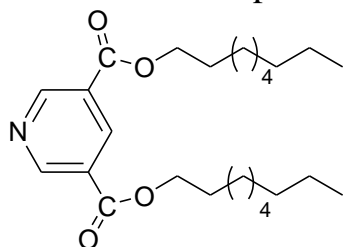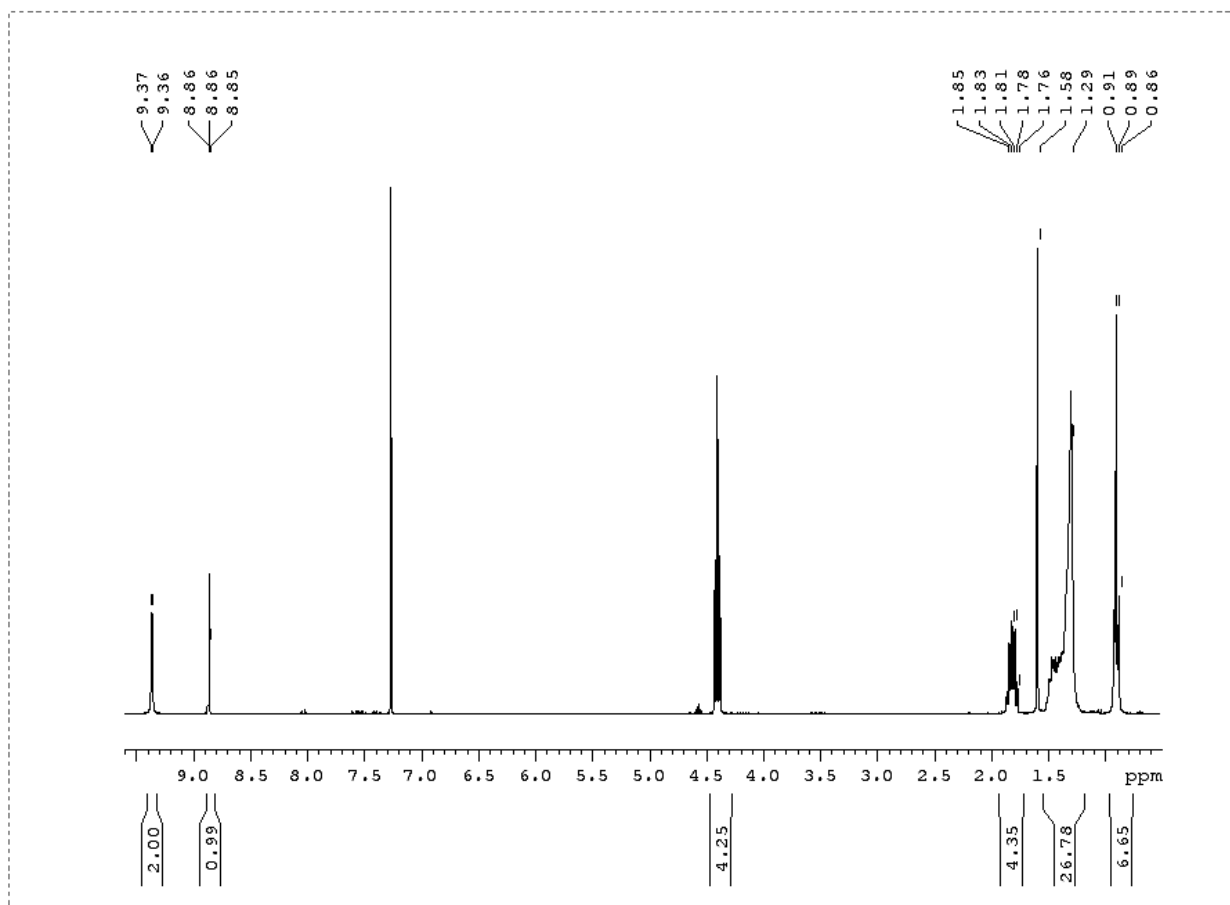

<sup>13</sup>CNMR for compound **diC9:0 pyridine**

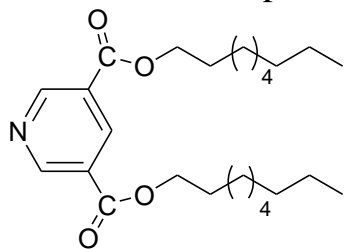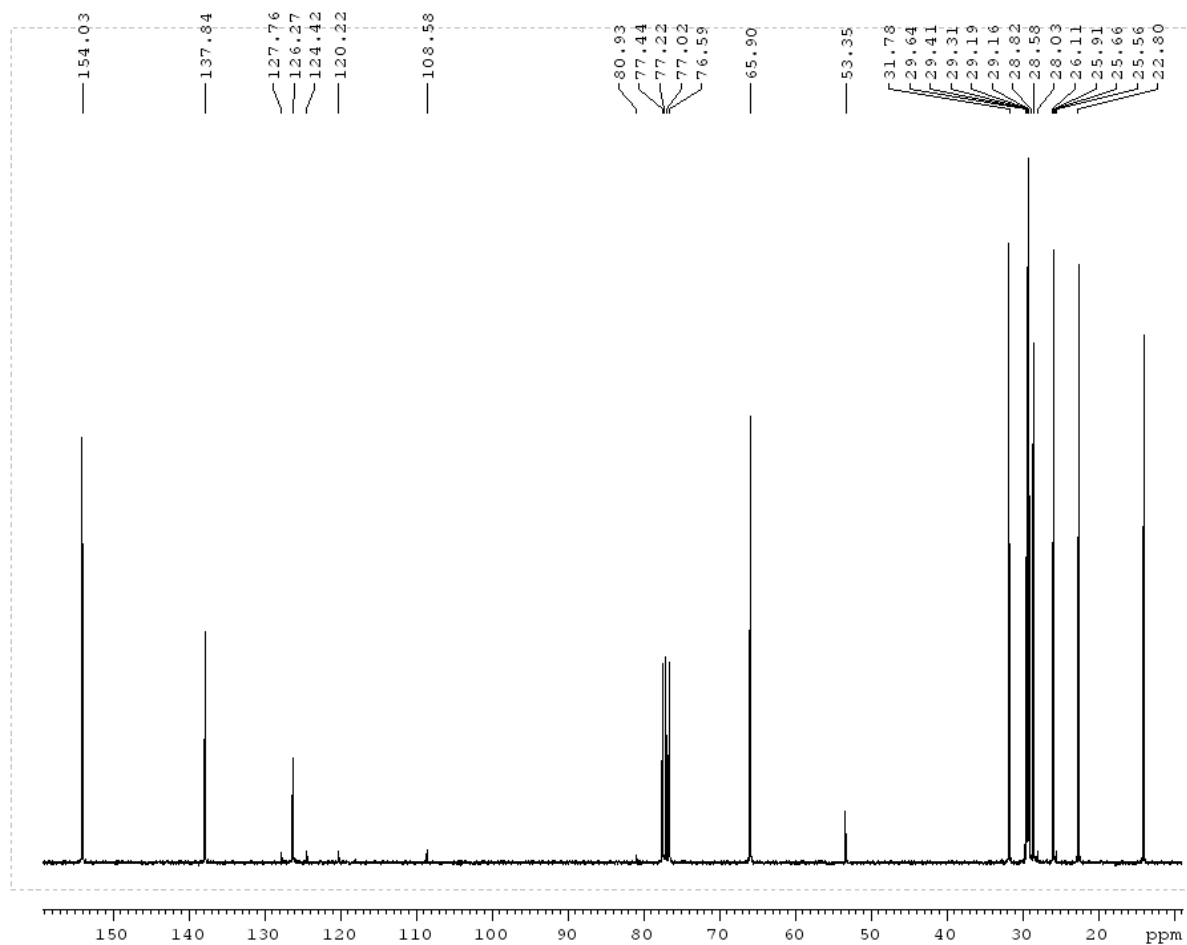

# <sup>1</sup>H NMR for compound diC9:0

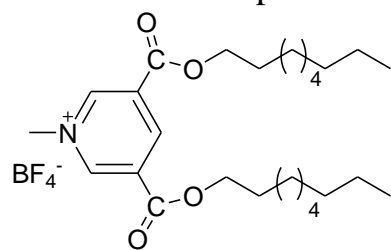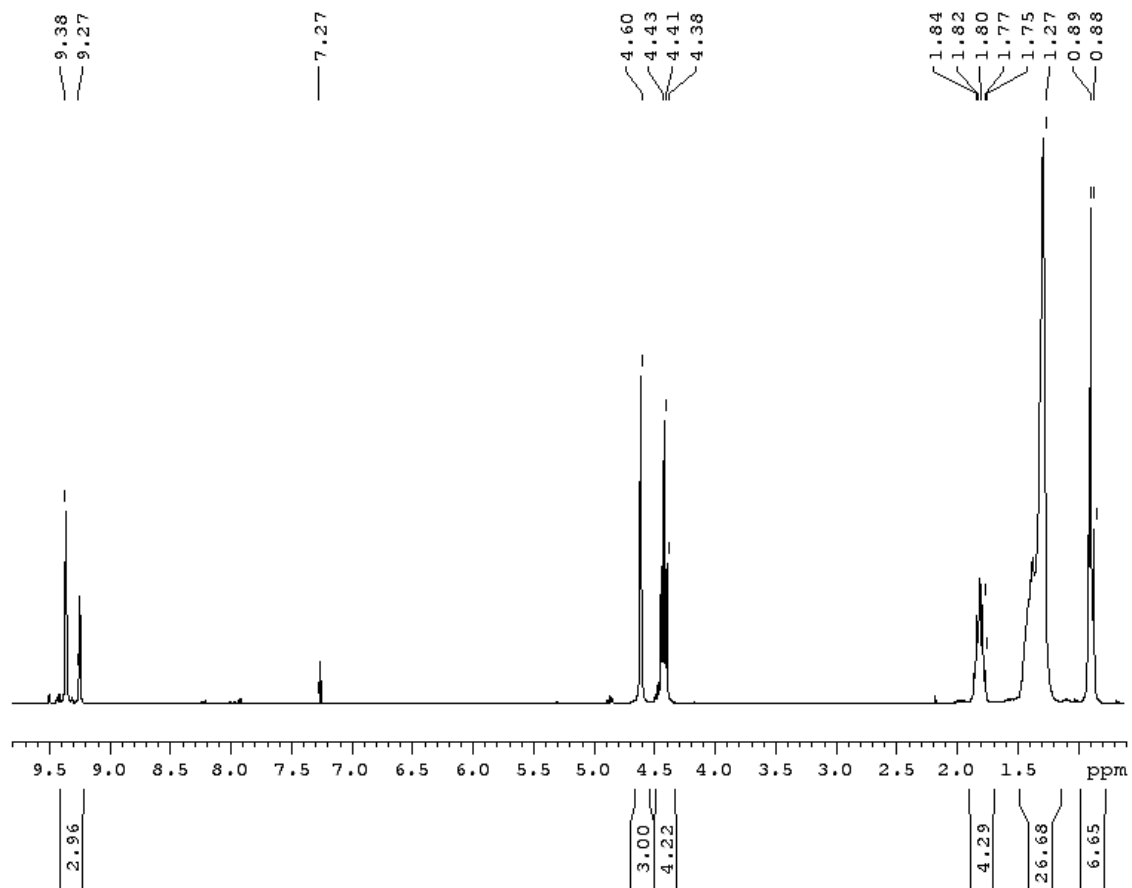

<sup>13</sup>CNMR for compound **diC9:0**

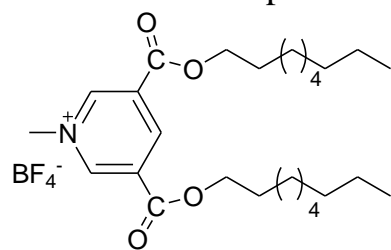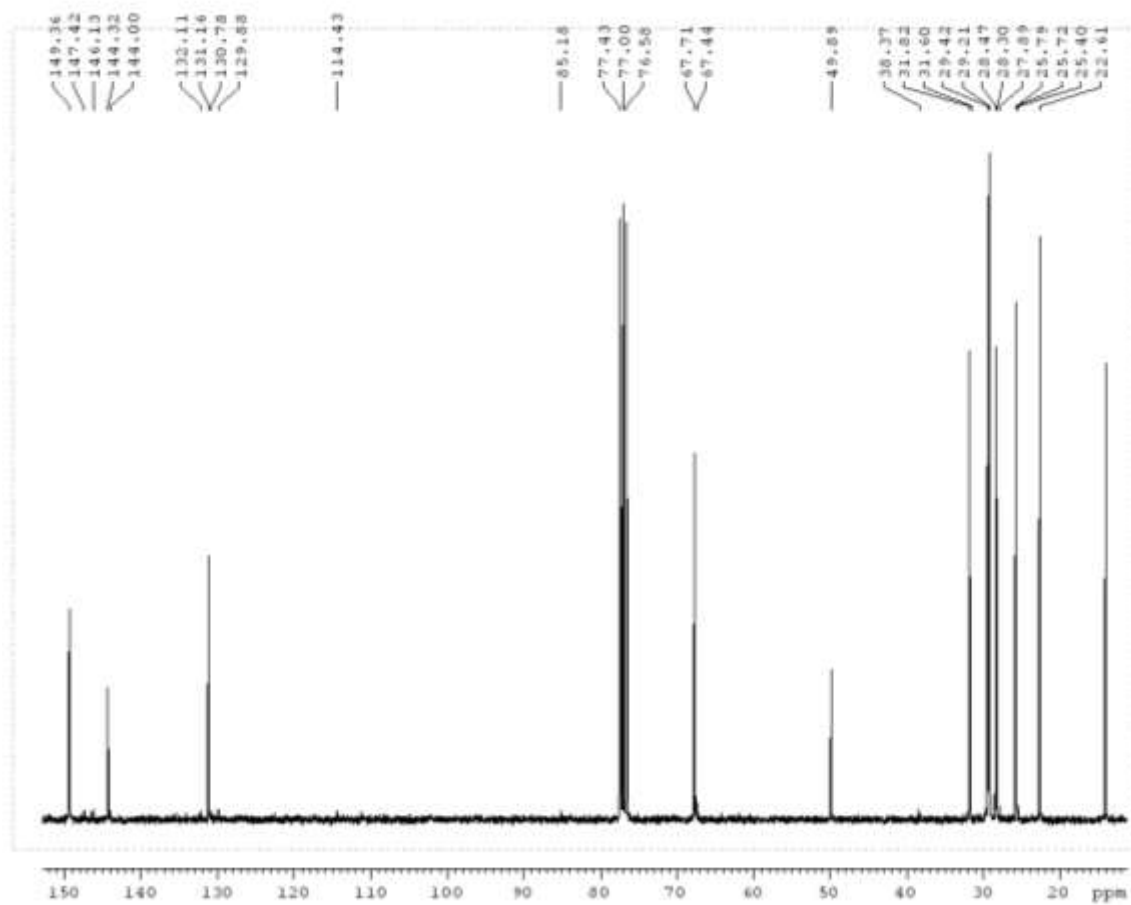

<sup>1</sup>H NMR for compound diC11:0 pyridine

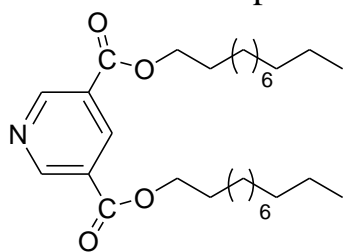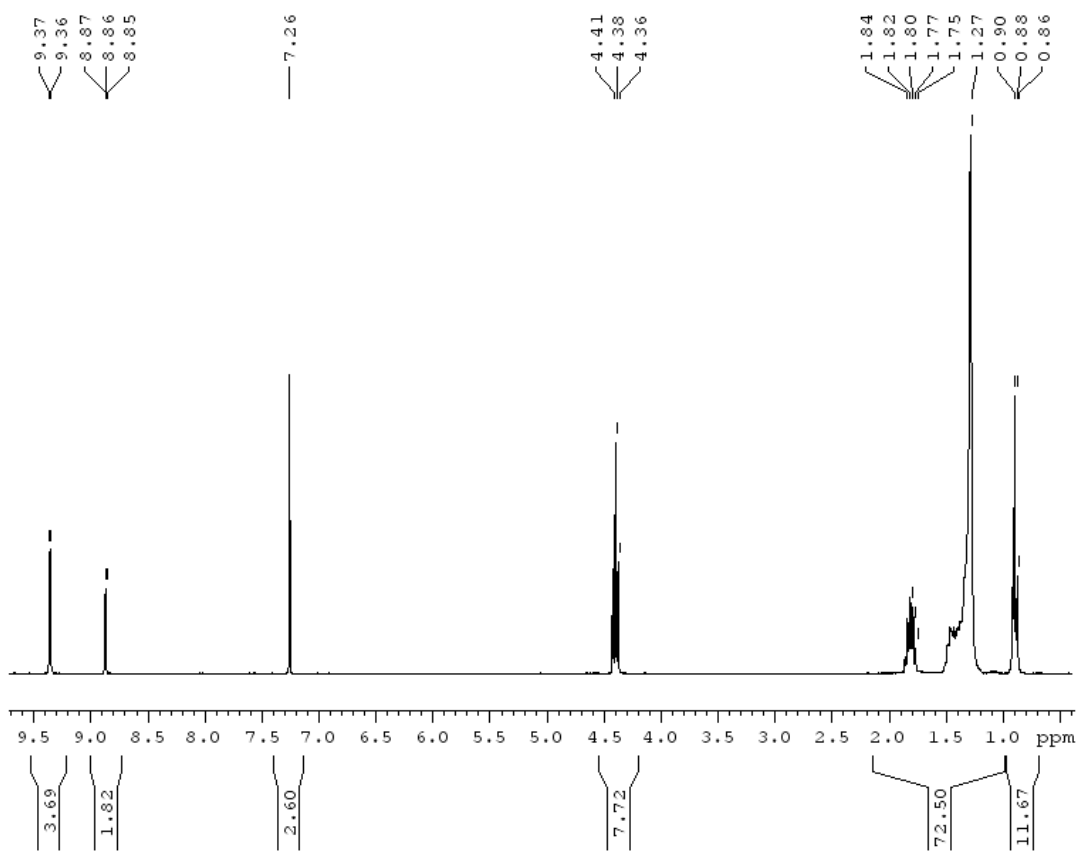

<sup>13</sup>CNMR for compound **diC11:0 pyridine**

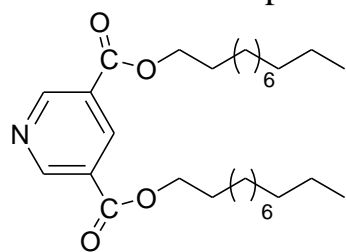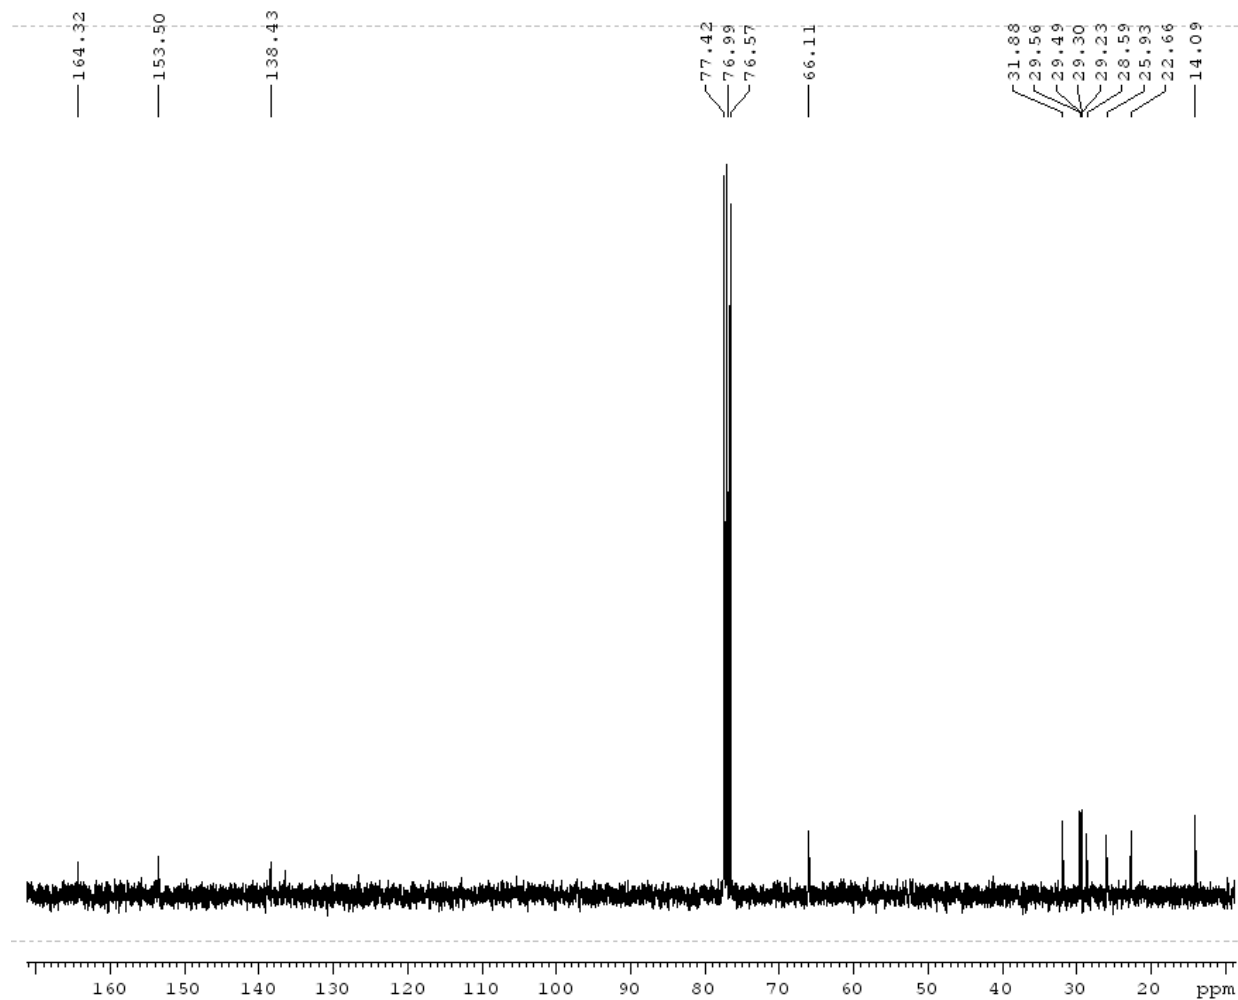



# <sup>1</sup>HNMR for compound diC11:0

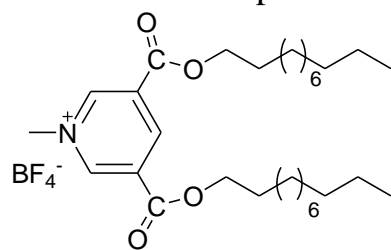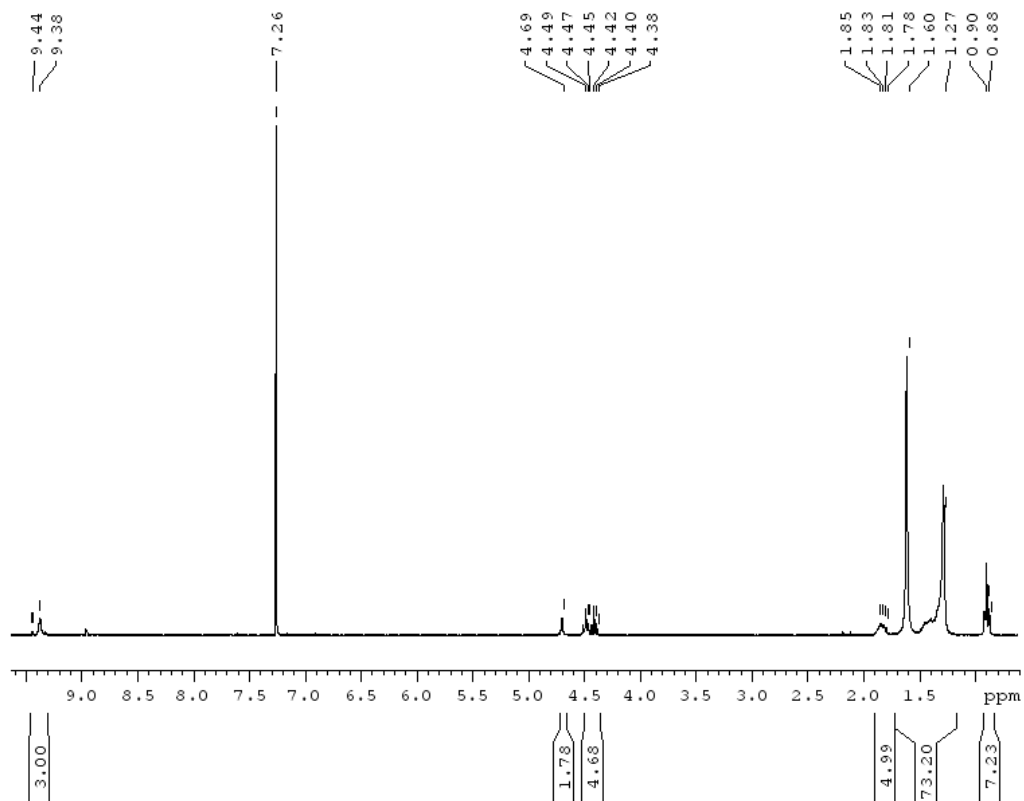

<sup>13</sup>C NMR for compound **diC11:0**

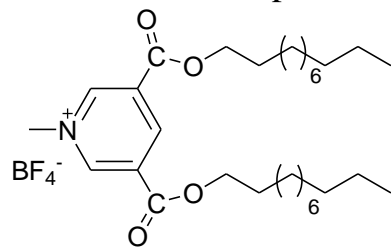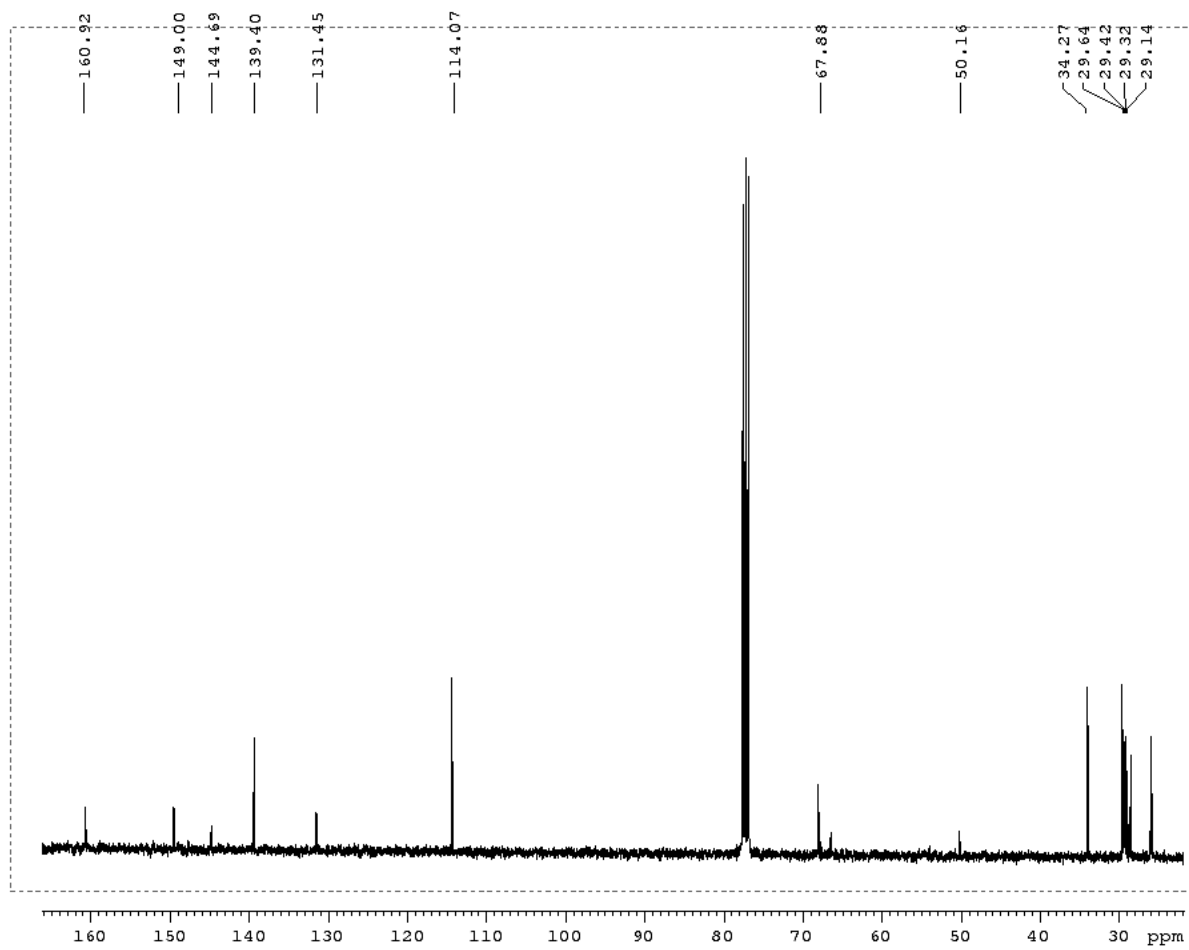

# <sup>1</sup>H NMR for compound diC12:0 Pyridine

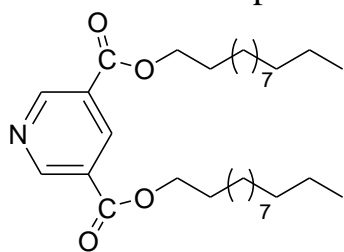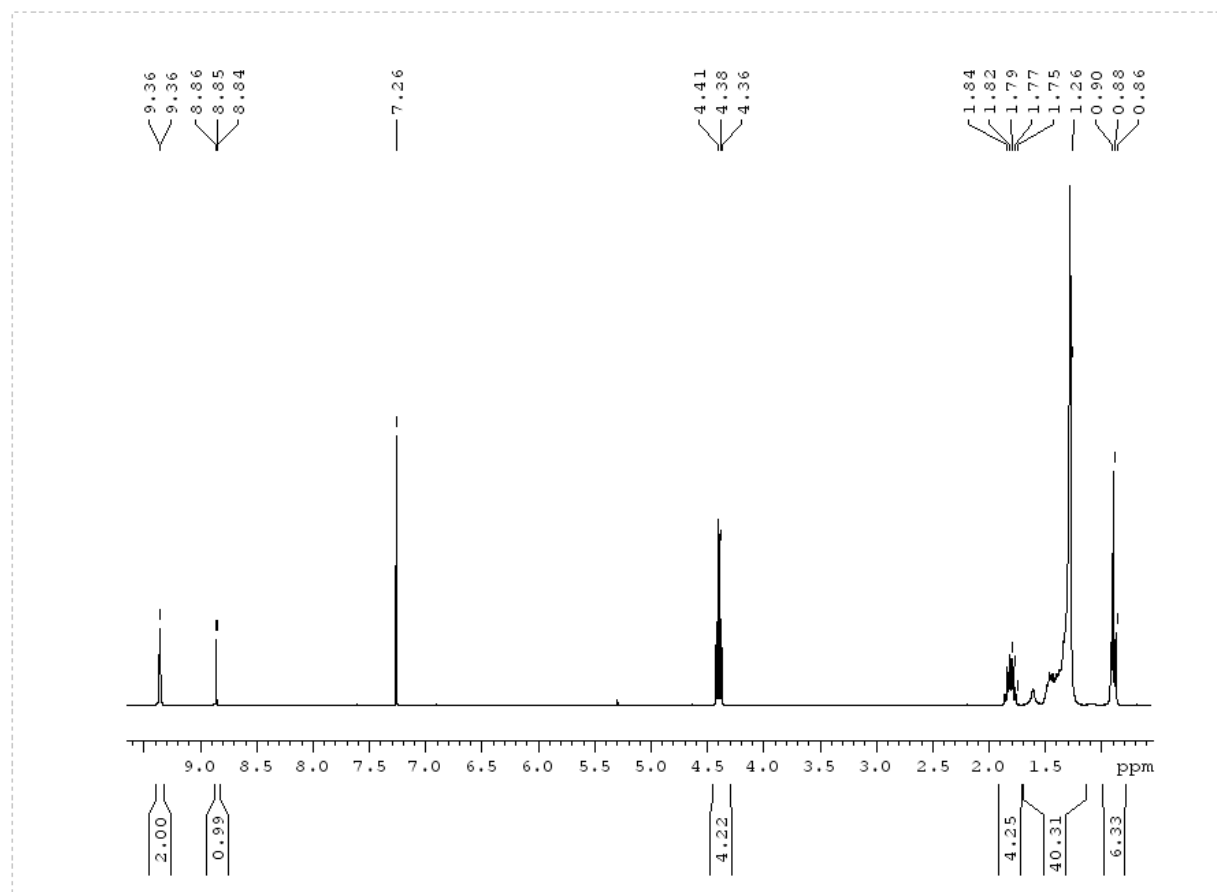

<sup>13</sup>CNMR for compound **diC12:0 Pyridine**

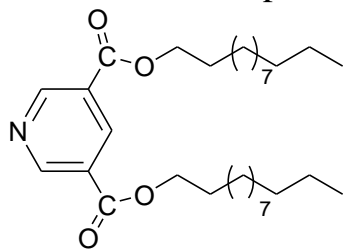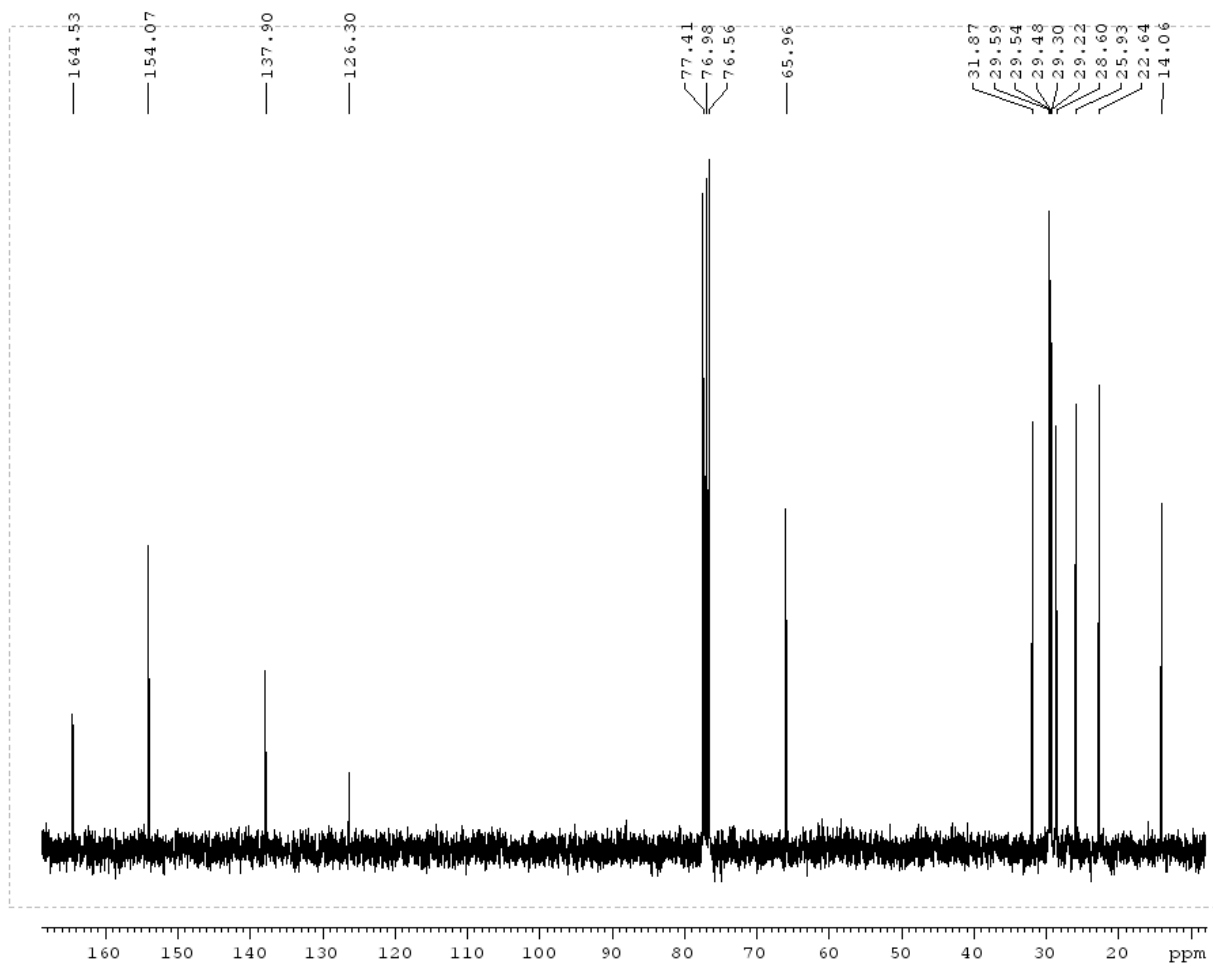

# <sup>1</sup>HNMR for compound diC12:0

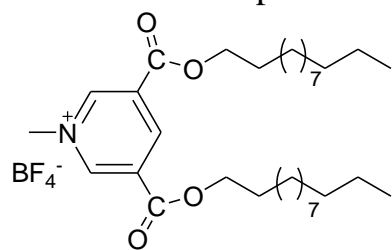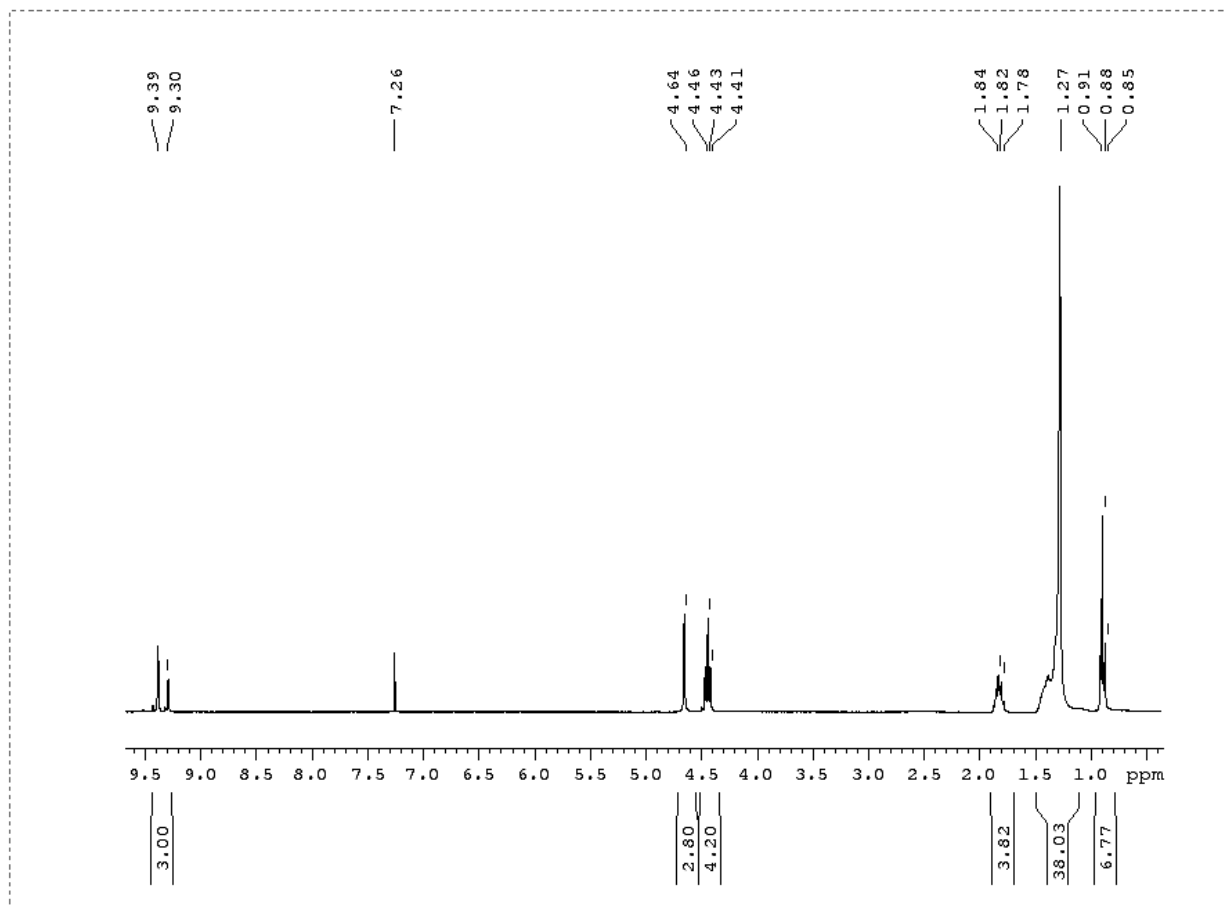

$^{13}\text{C}$ NMR for compound **diC12:0**

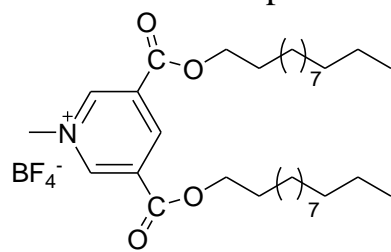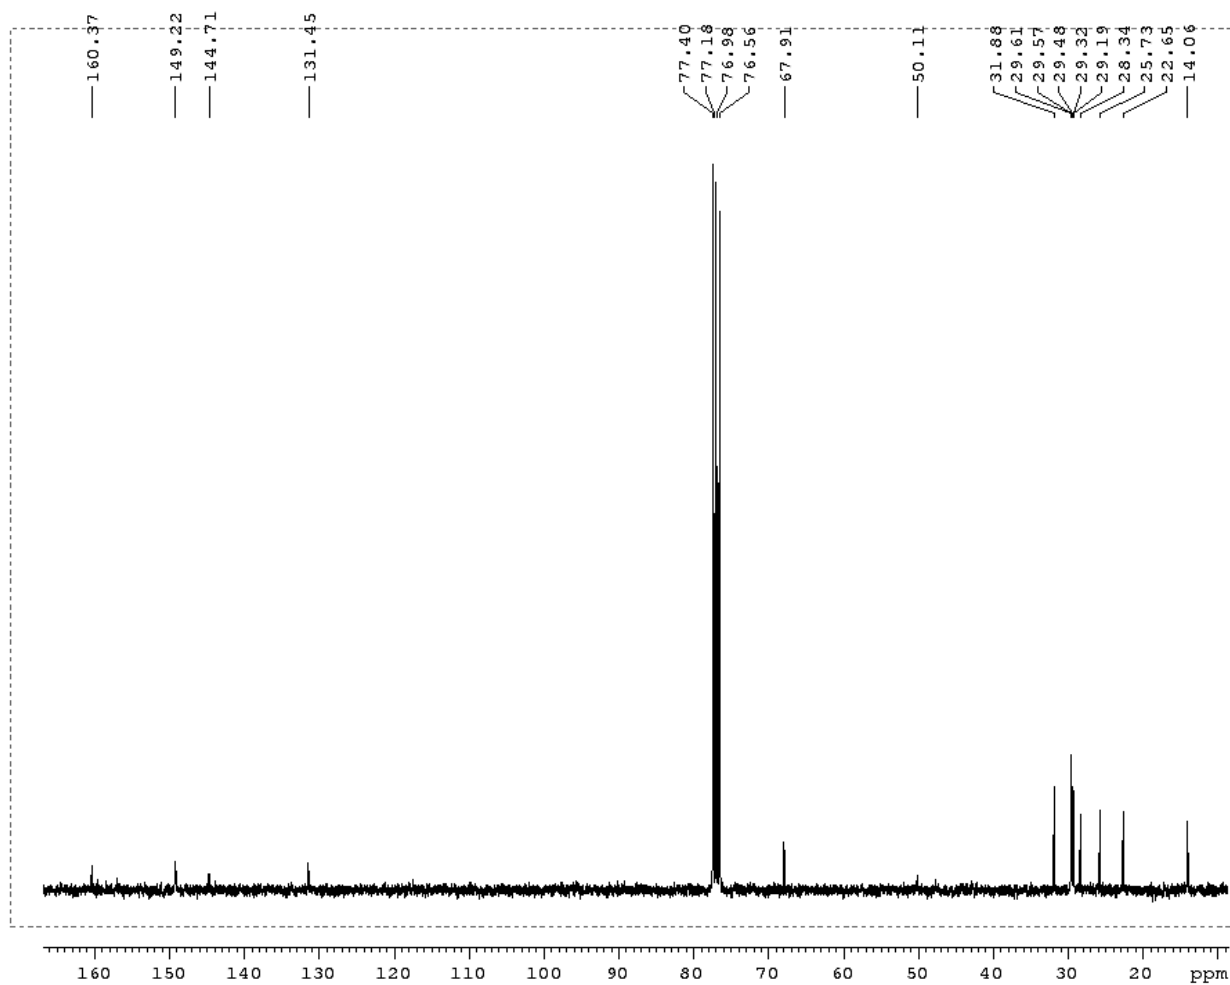

# <sup>1</sup>H NMR for compound diC14:0 pyridine

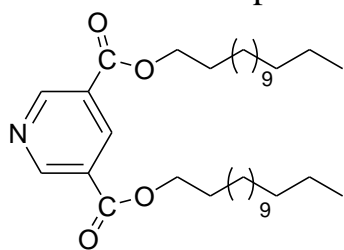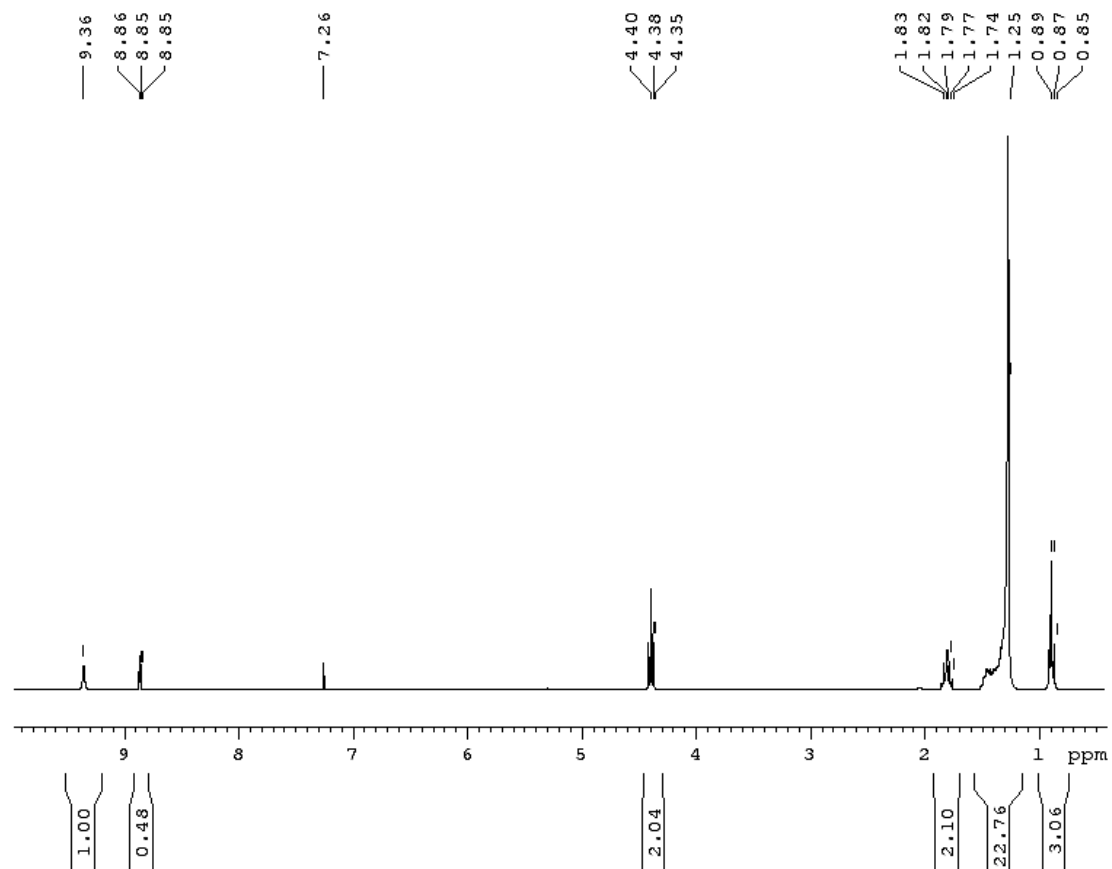

<sup>13</sup>CNMR for compound **diC14:0 pyridine**

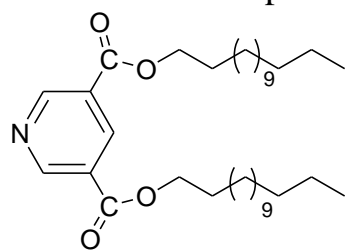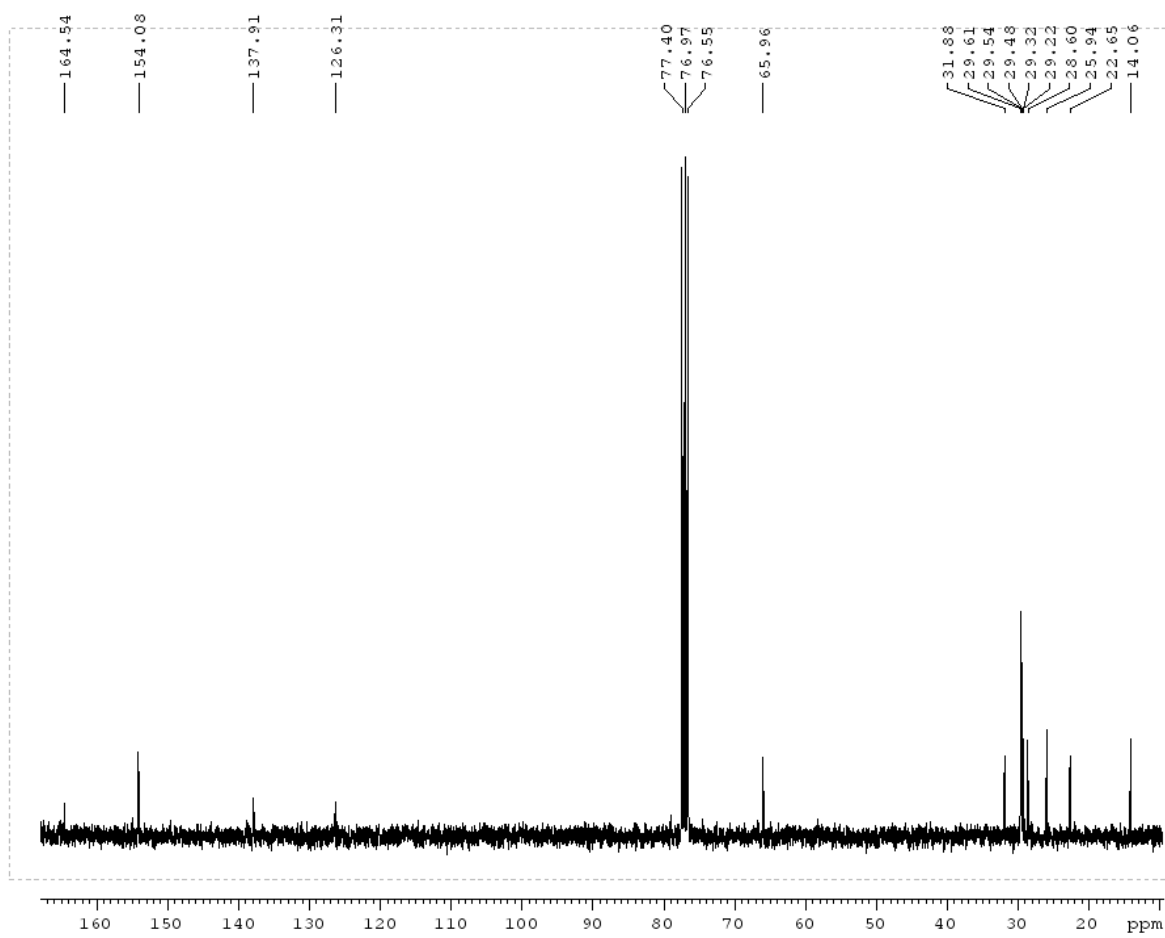



<sup>1</sup>H NMR for compound **diC14:0**

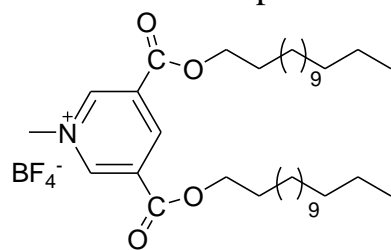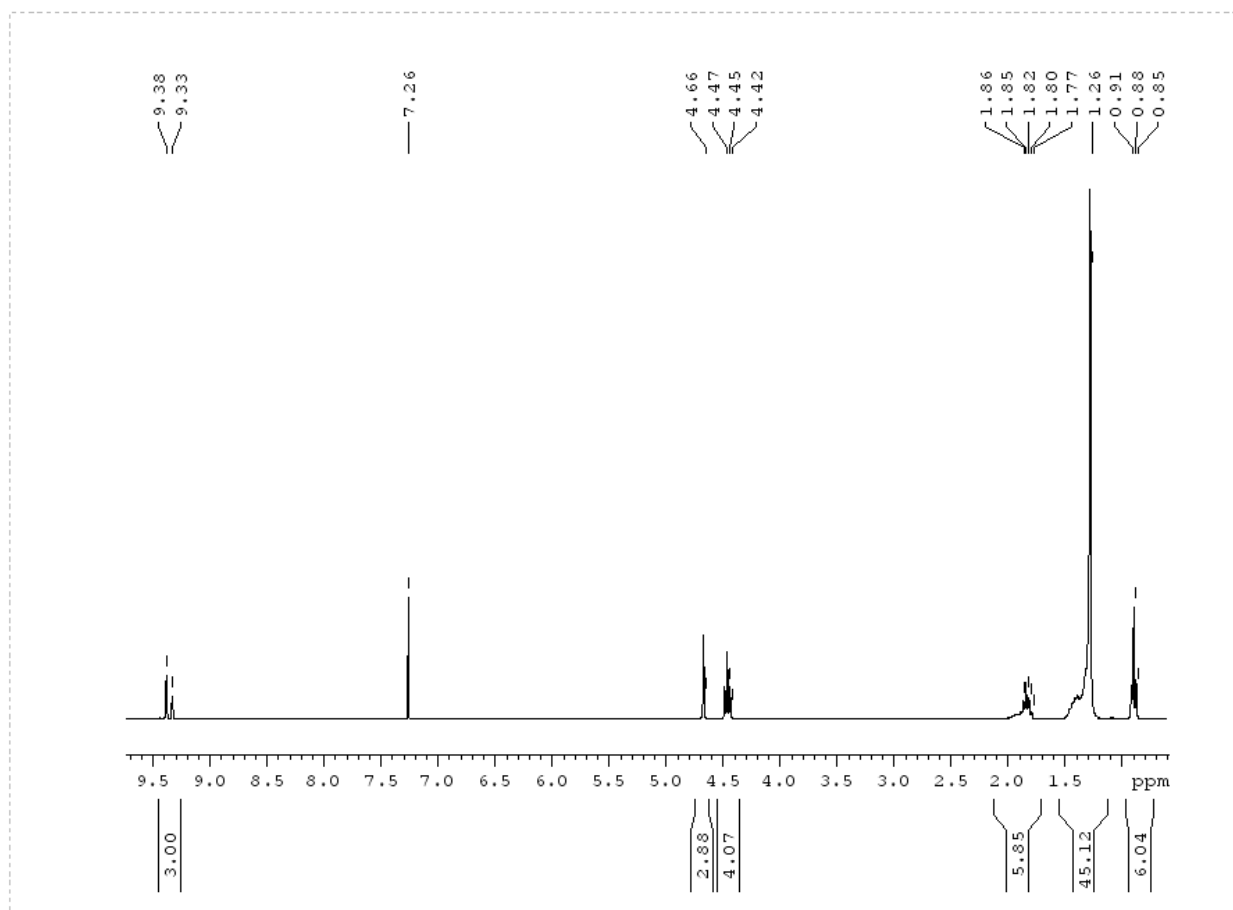

<sup>13</sup>CNMR for compound **diC14:0**

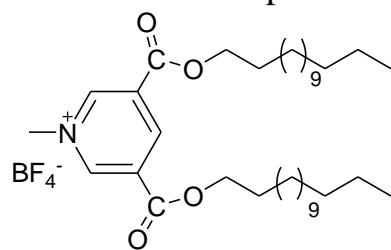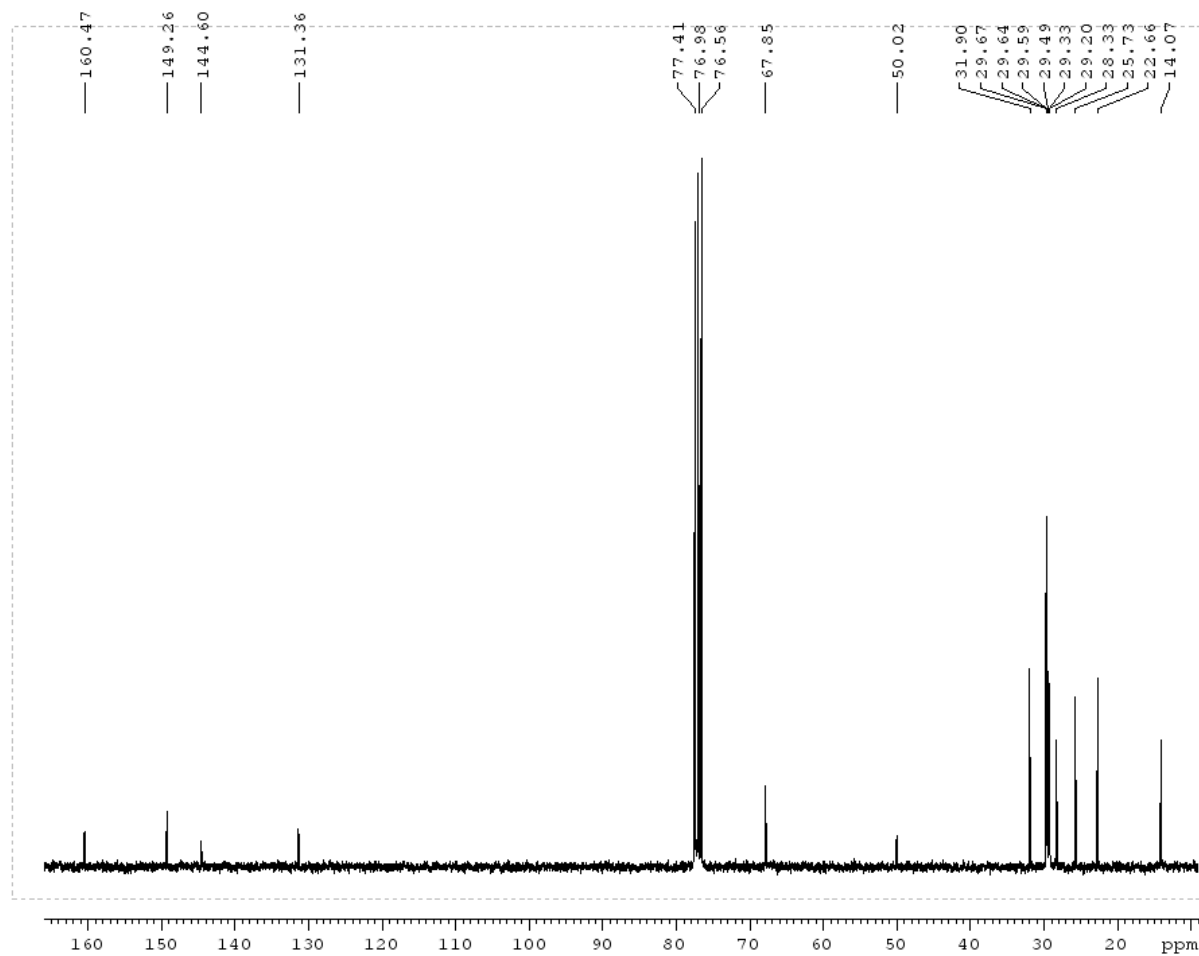

# <sup>1</sup>H NMR for compound diC18:0 pyridine

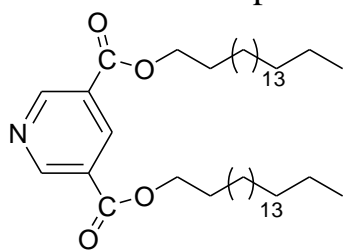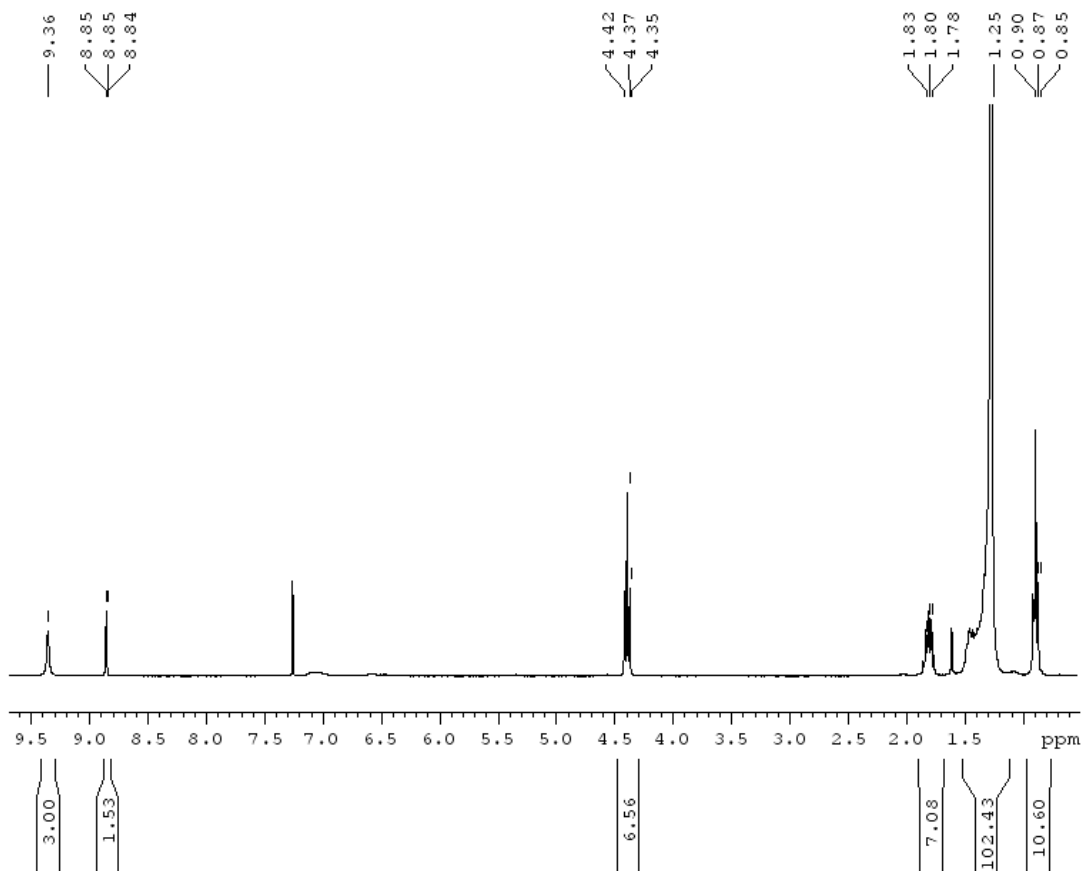

<sup>13</sup>CNMR for compound **diC18:0 pyridine**

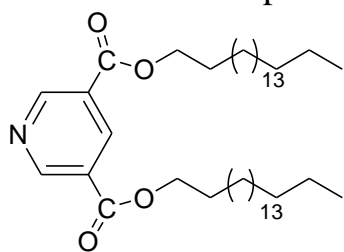

**2-18**

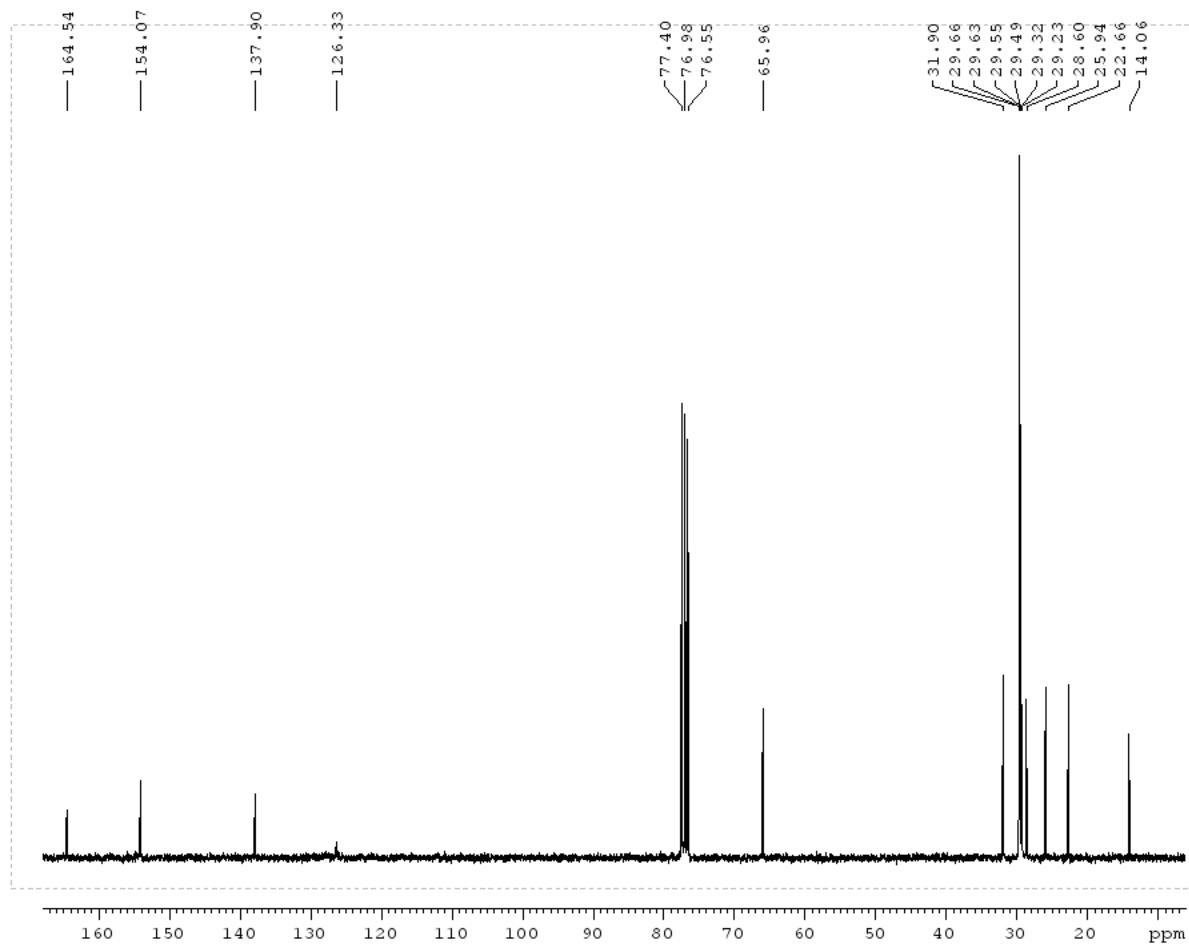

<sup>1</sup>H NMR for compound diC18:0

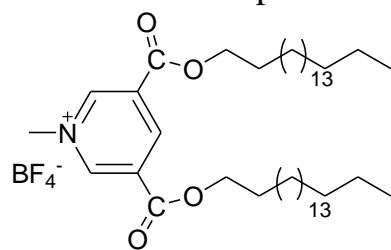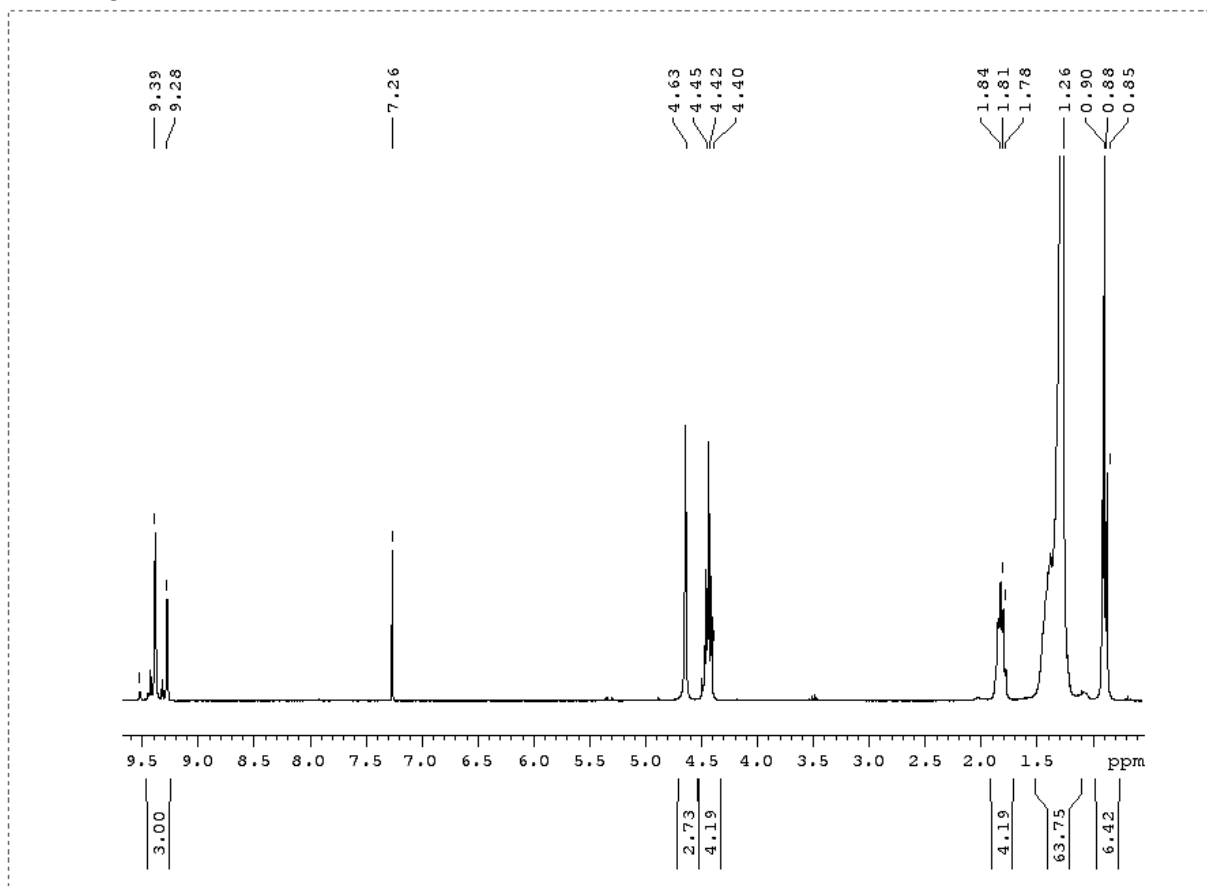

<sup>13</sup>CNMR for compound **diC18:0**

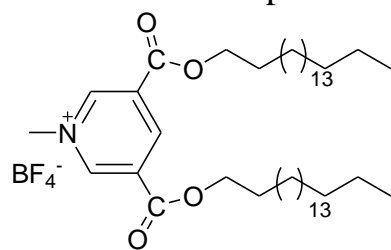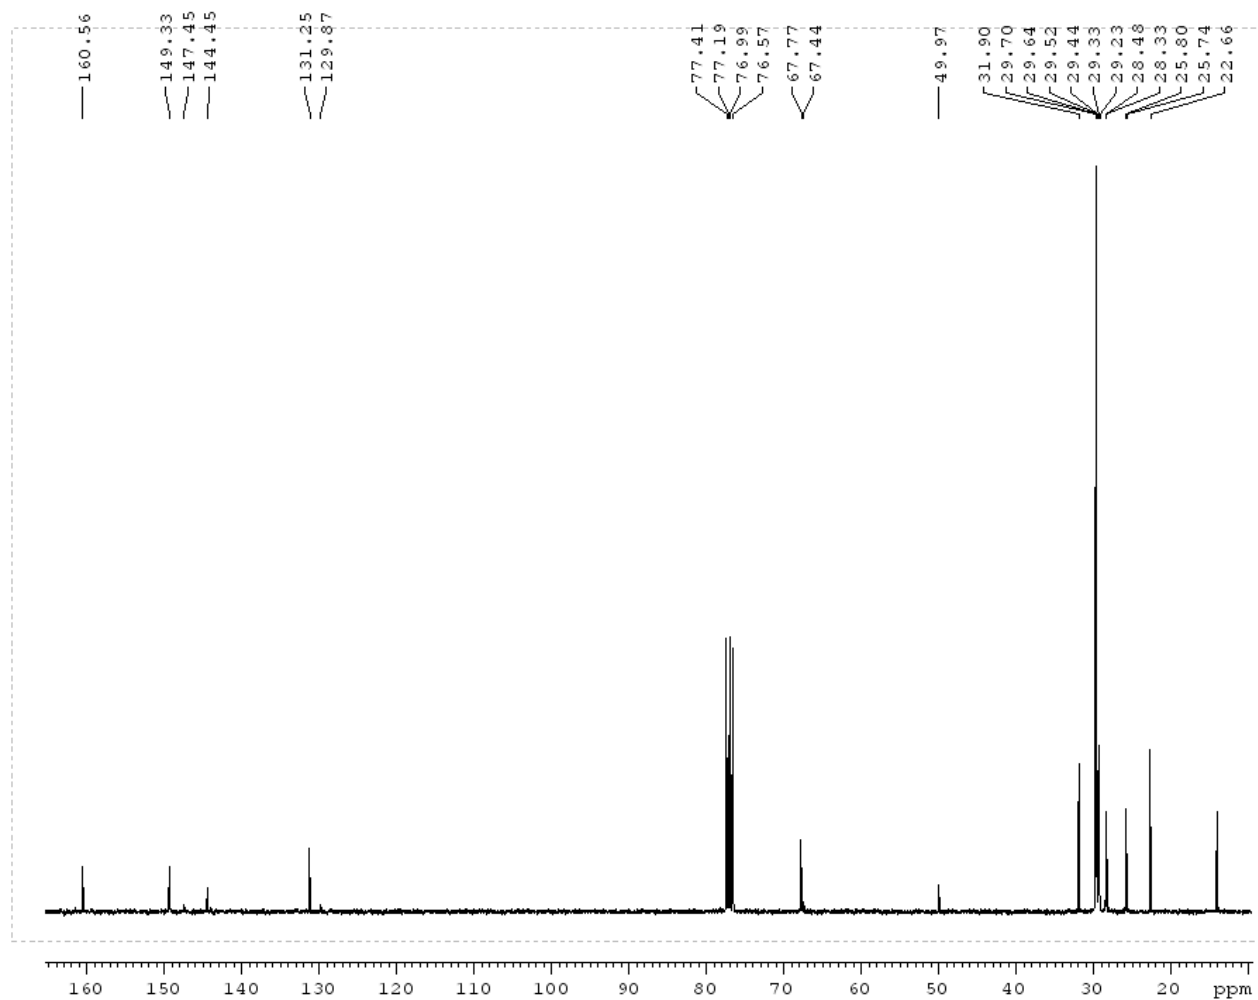

# <sup>1</sup>H NMR for compound diC20:0 pyridine

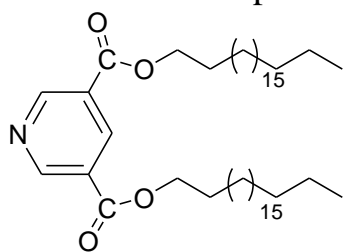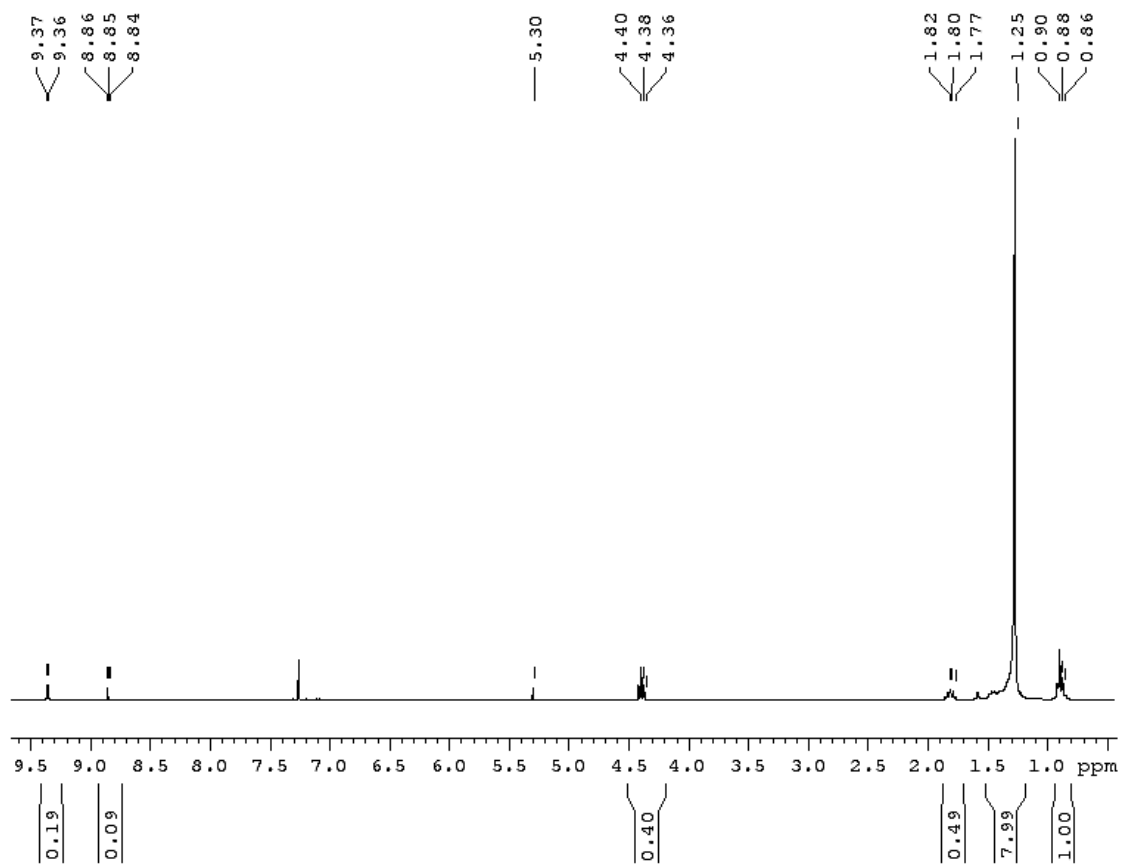

<sup>13</sup>CNMR for compound diC20:0 pyridine

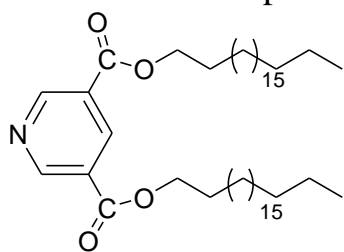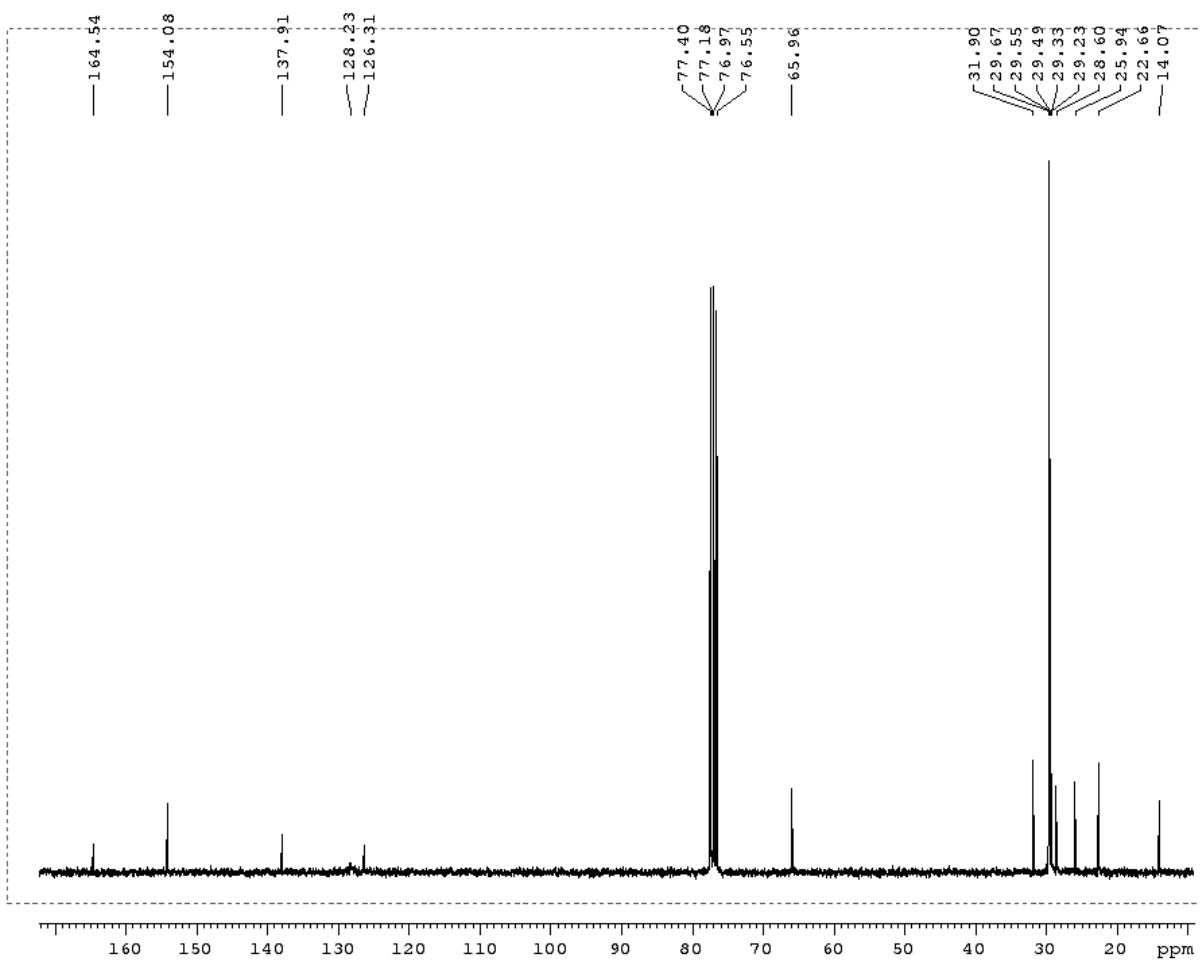



# <sup>1</sup>H NMR for compound diC20:0

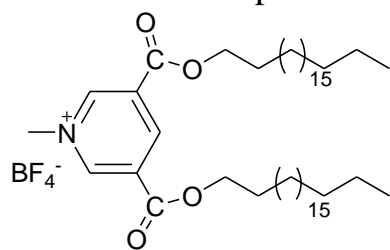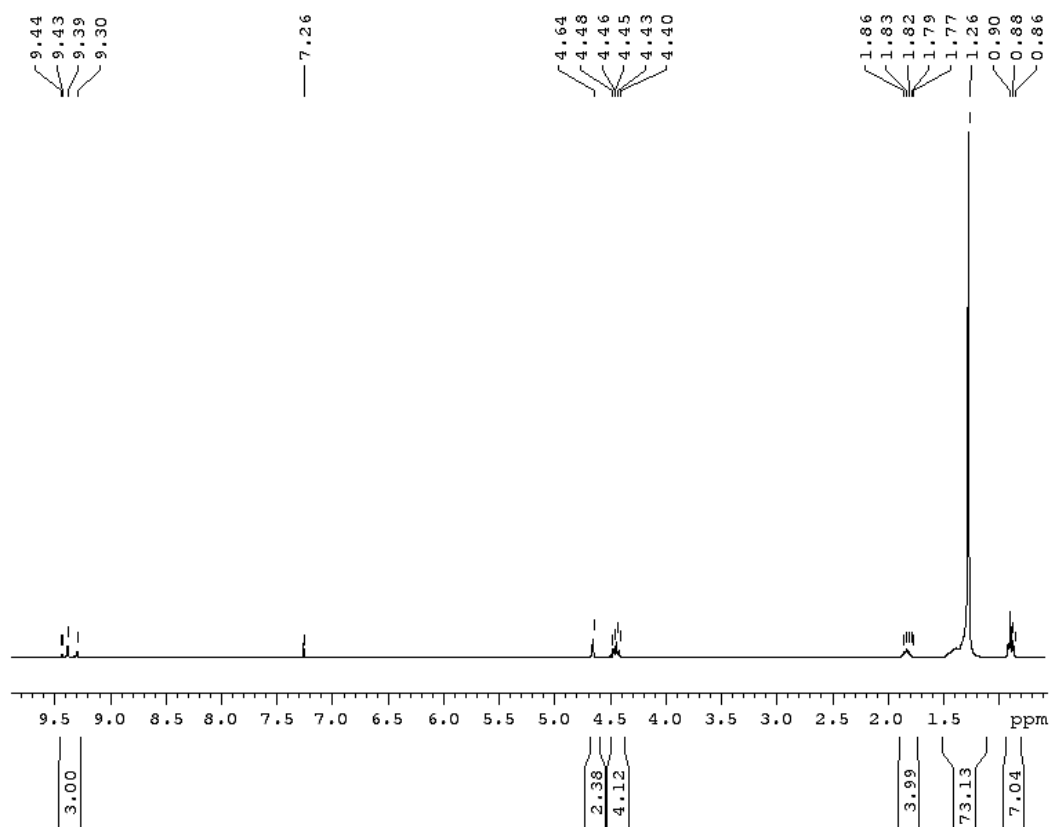

$^{13}\text{C}$ NMR for compound **diC20:0**

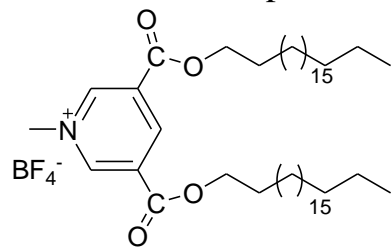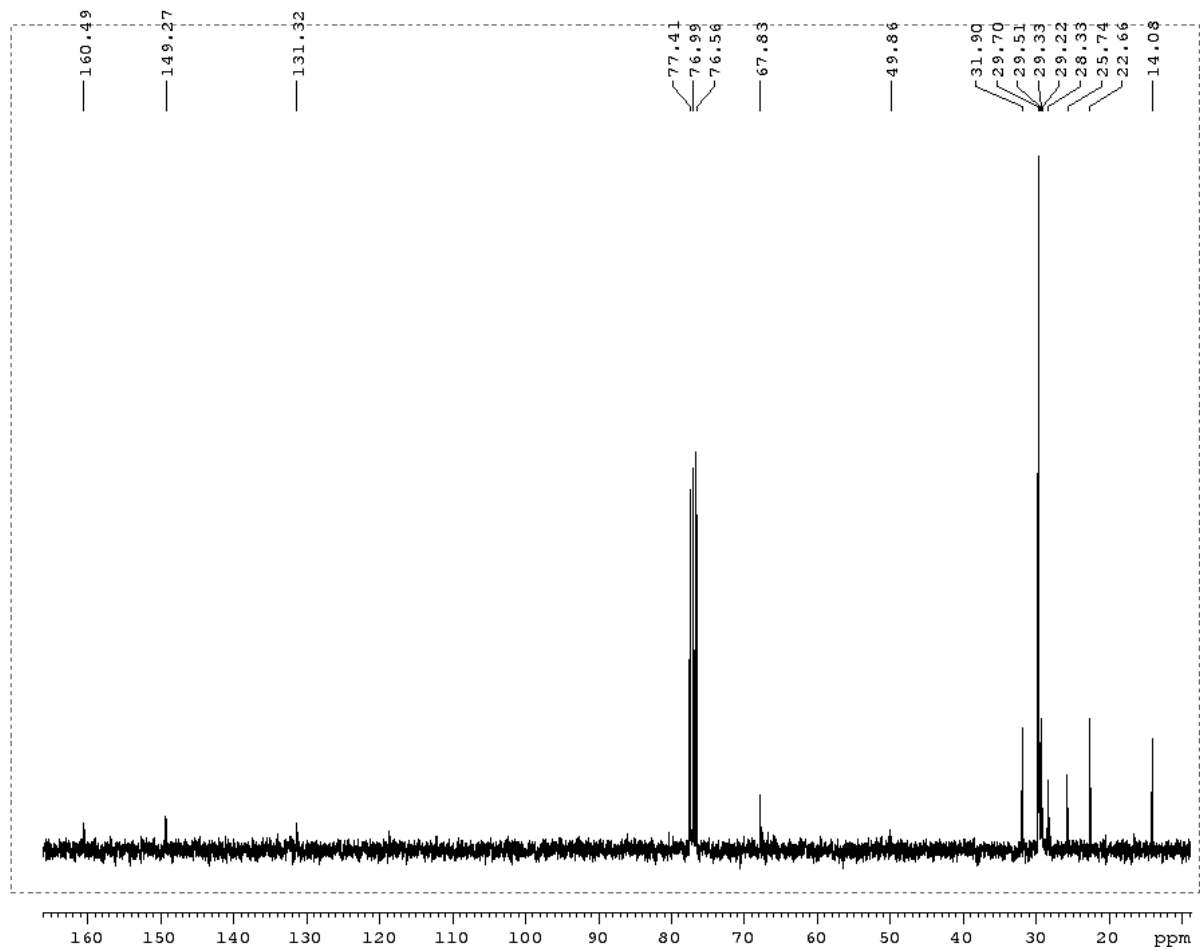

<sup>1</sup>H NMR for compound **diisoC9:0 pyridine**

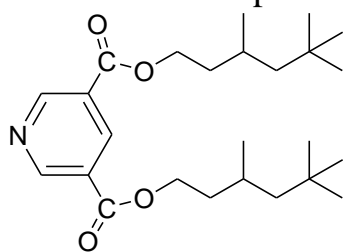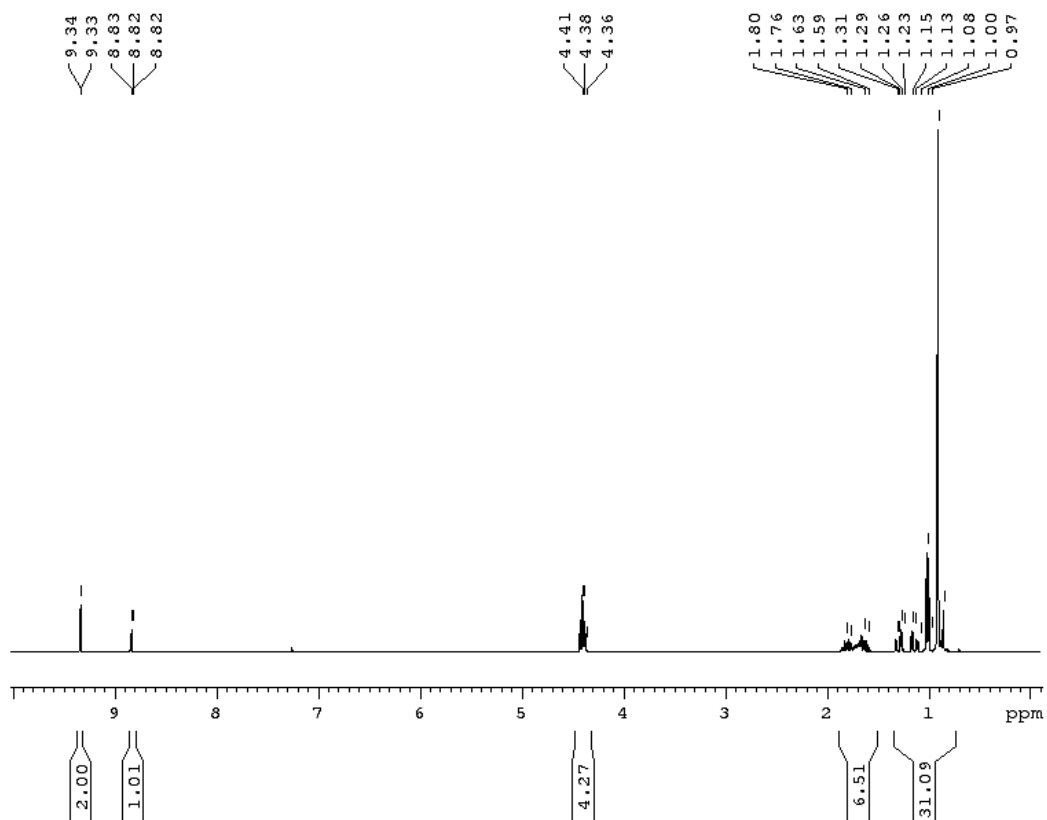

<sup>13</sup>CNMR for compound **diisoC9:0 pyridine**

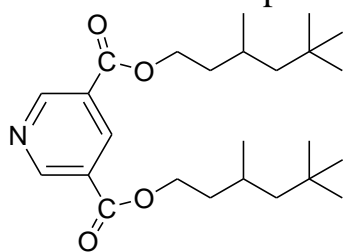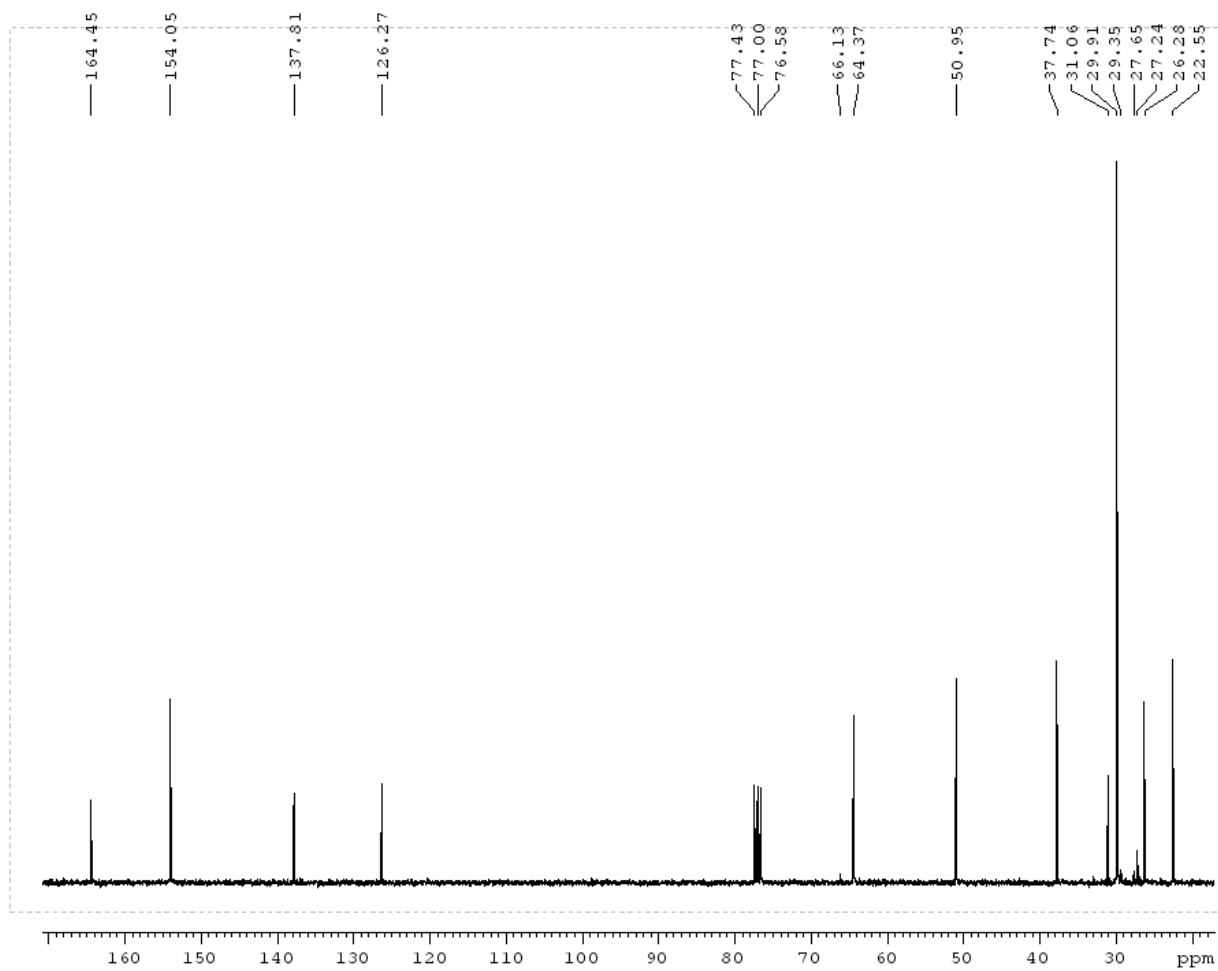

<sup>1</sup>H NMR for compound **diisoC9:0**

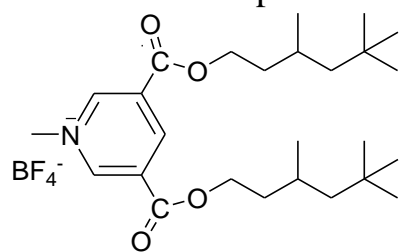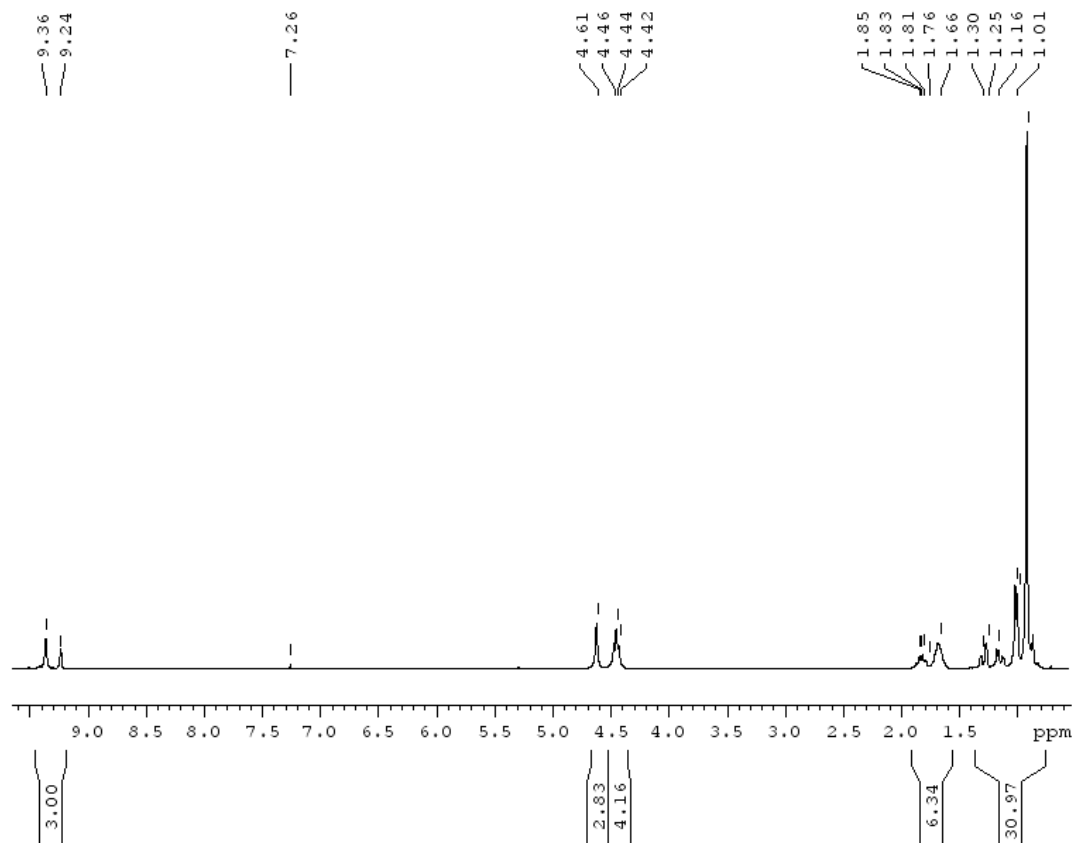

<sup>13</sup>CNMR for compound **diisoC9:0**

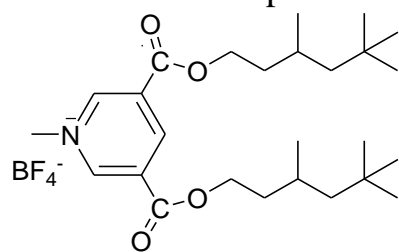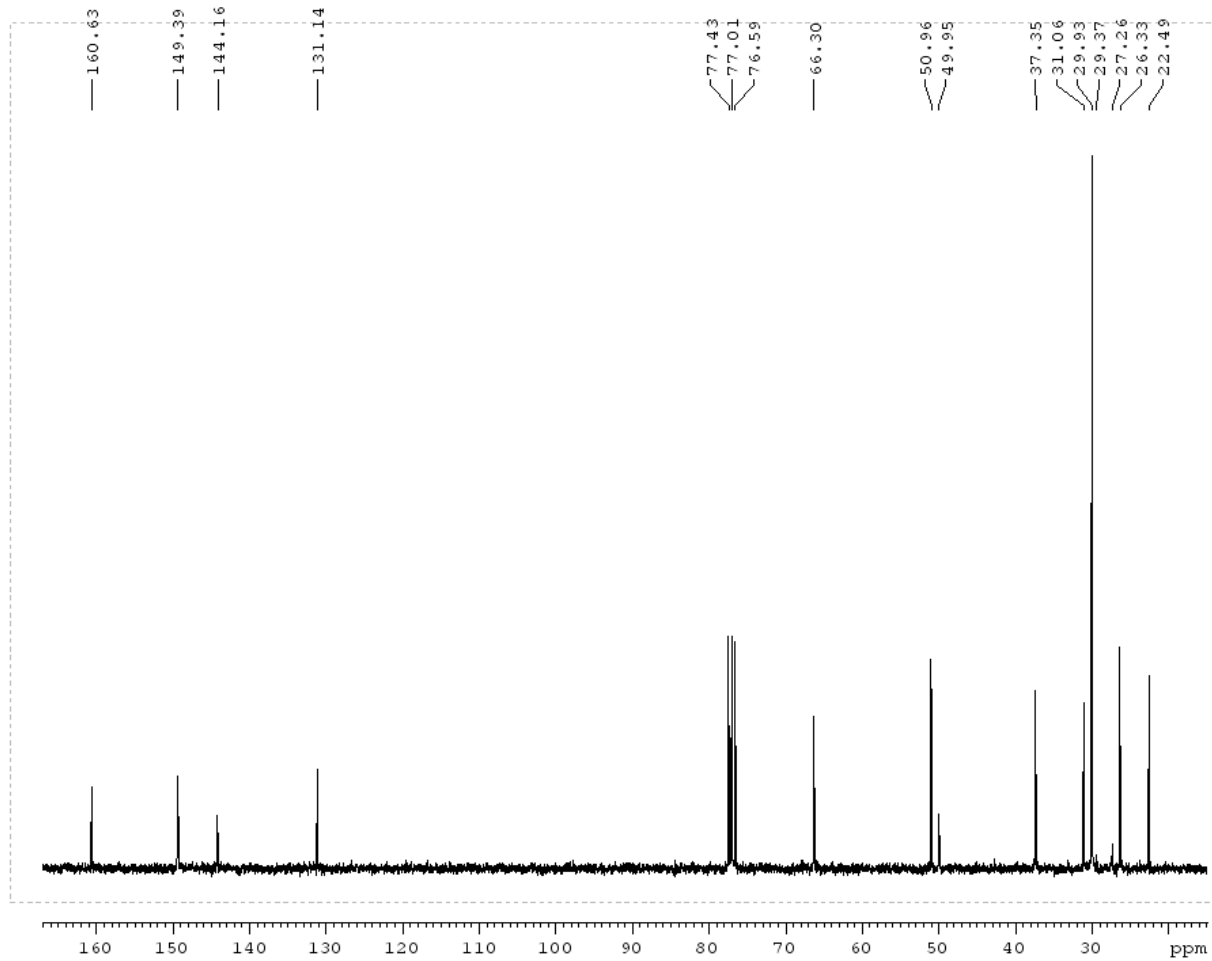

<sup>1</sup>HNMR for compound **dibrC20:0 pyridine**

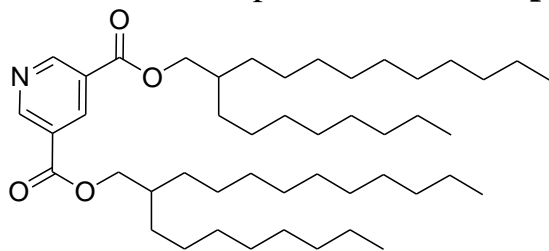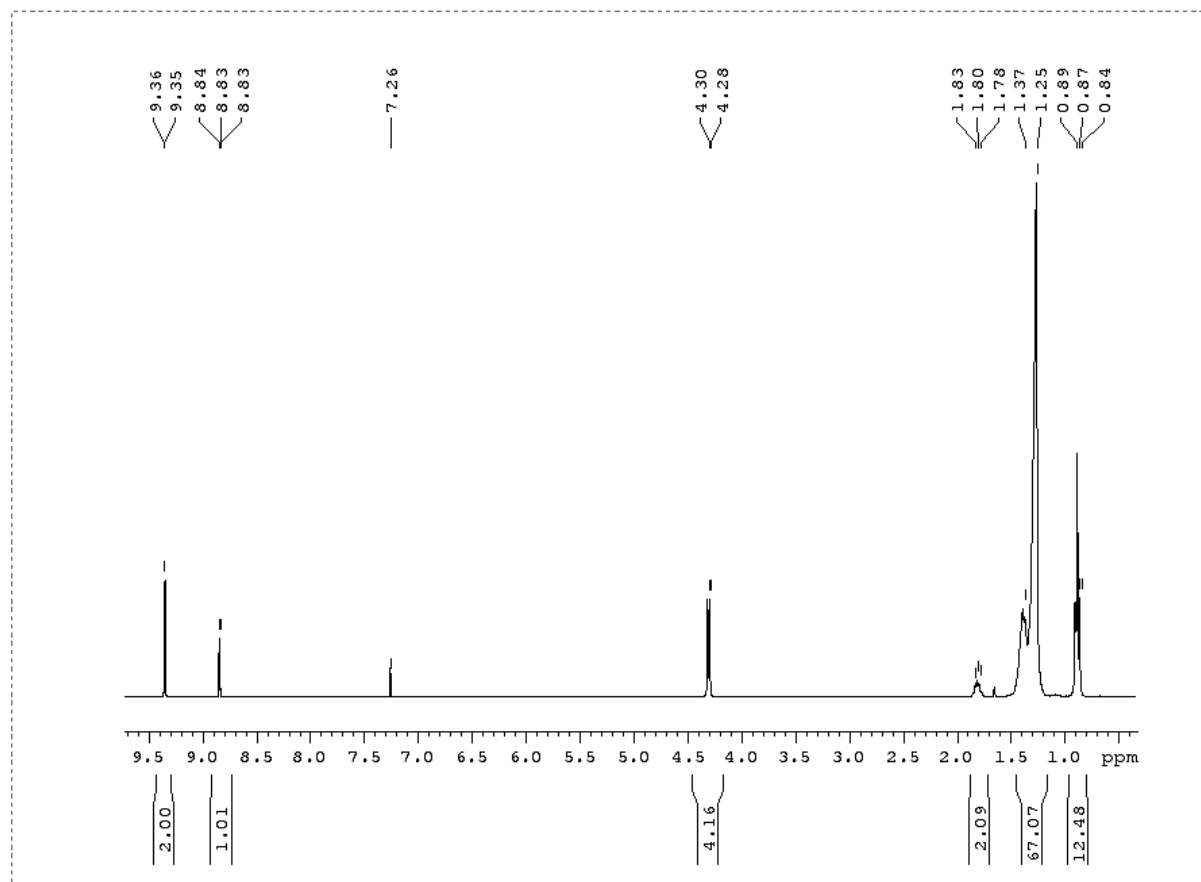

<sup>13</sup>CNMR for compound **dibrC20:0 pyridine**

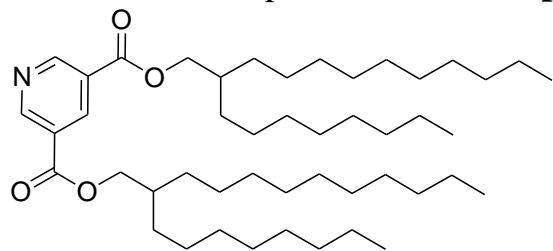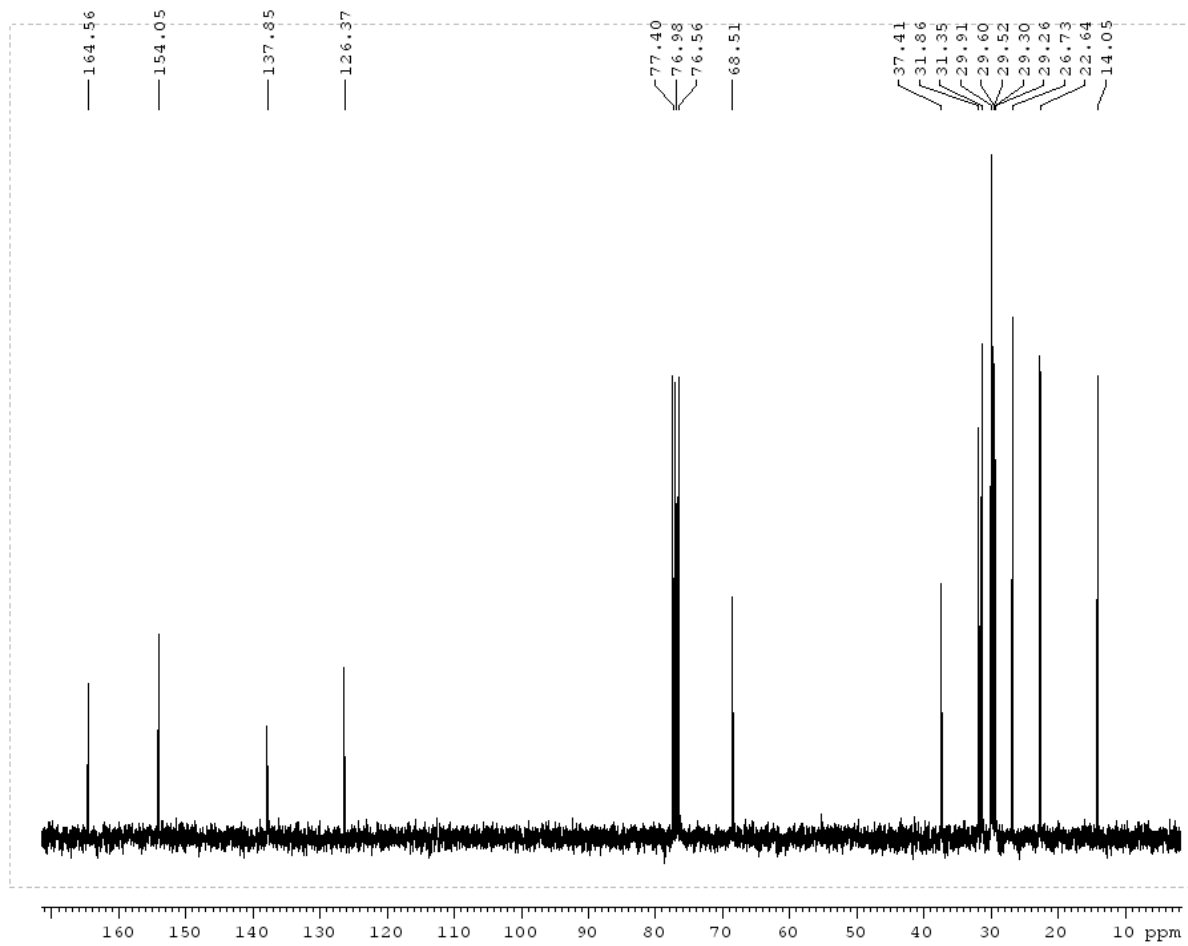



# <sup>1</sup>H NMR for compound **dibrC20:0**

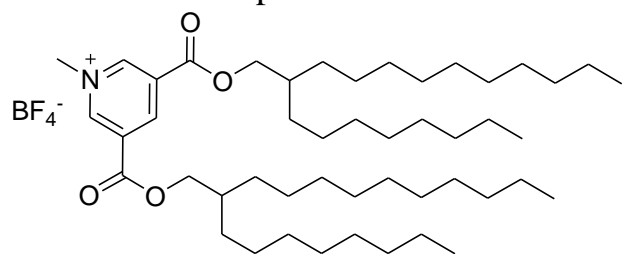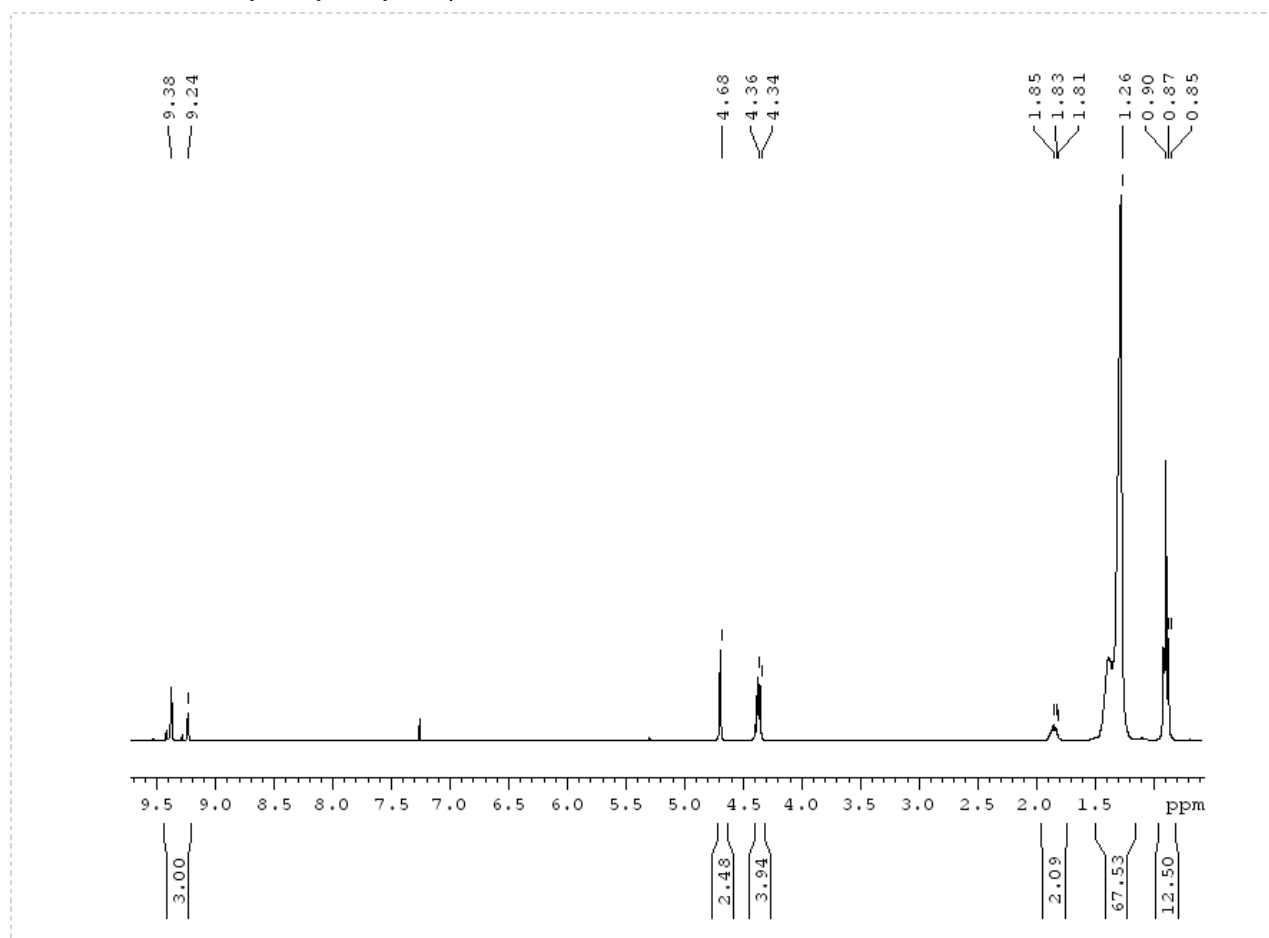

<sup>13</sup>CNMR for compound **dibrC20:0**

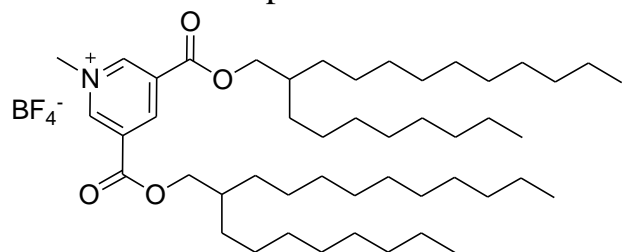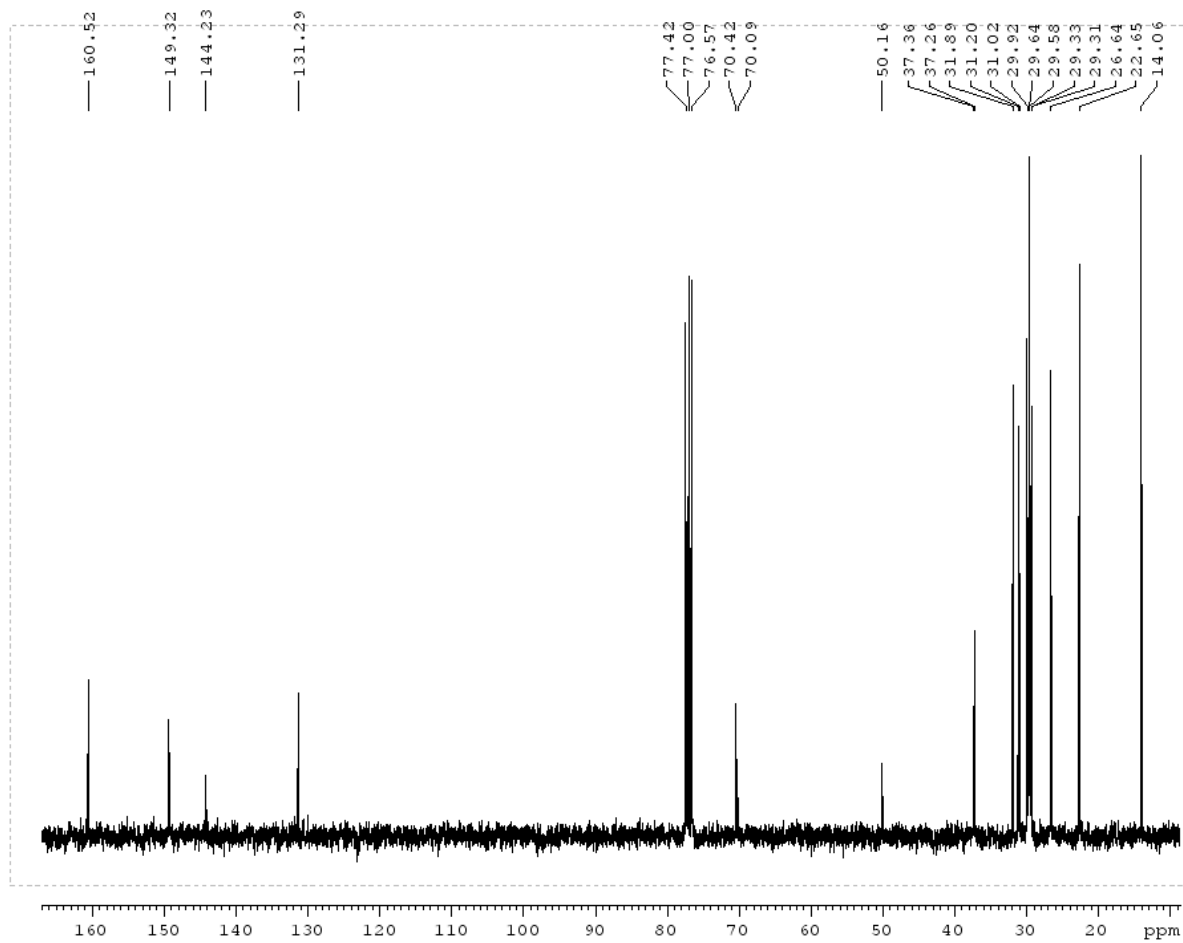

# <sup>1</sup>HNMR for compound diC18:1 pyridine

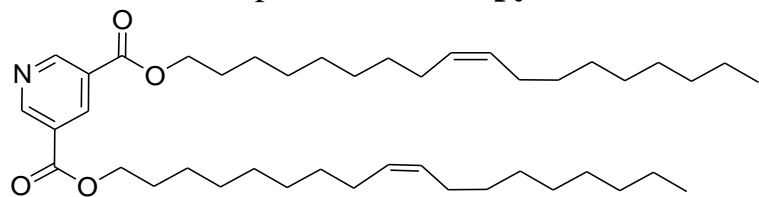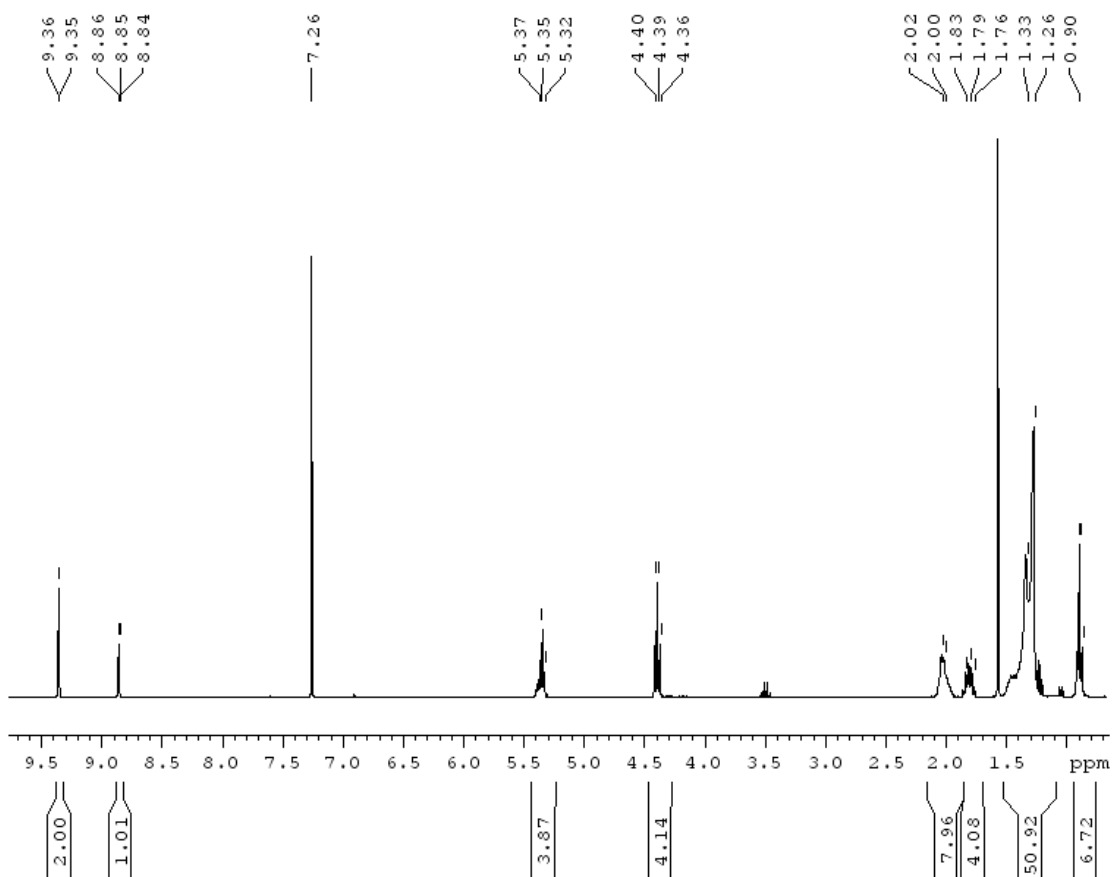

<sup>13</sup>CNMR for compound **diC18:1 pyridine**

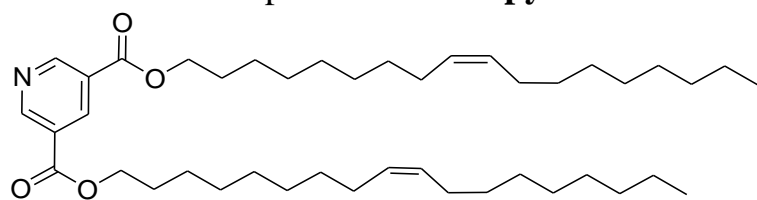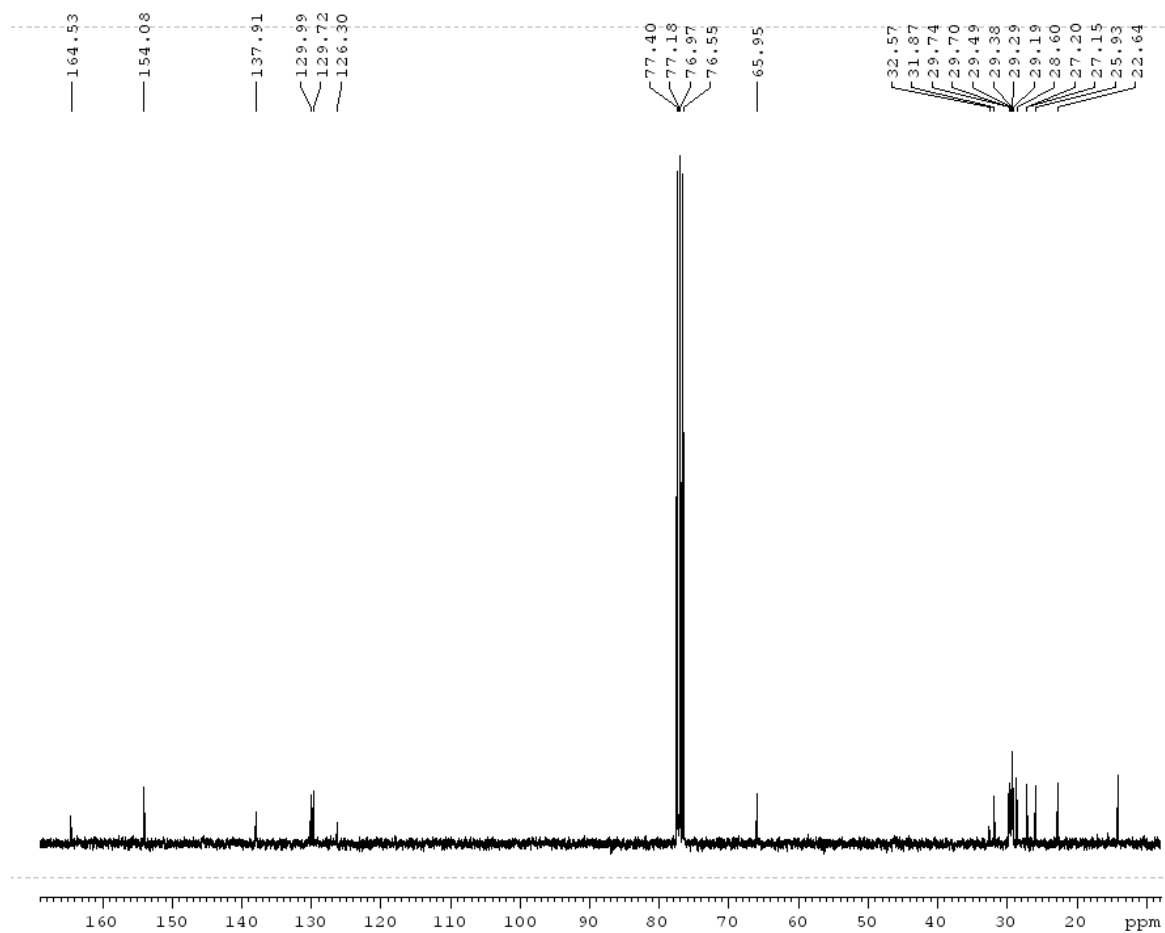

# <sup>1</sup>HNMR for compound diC18:1

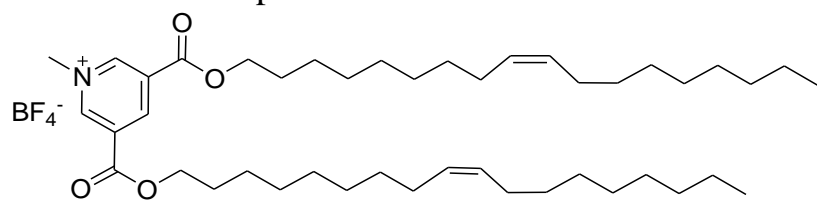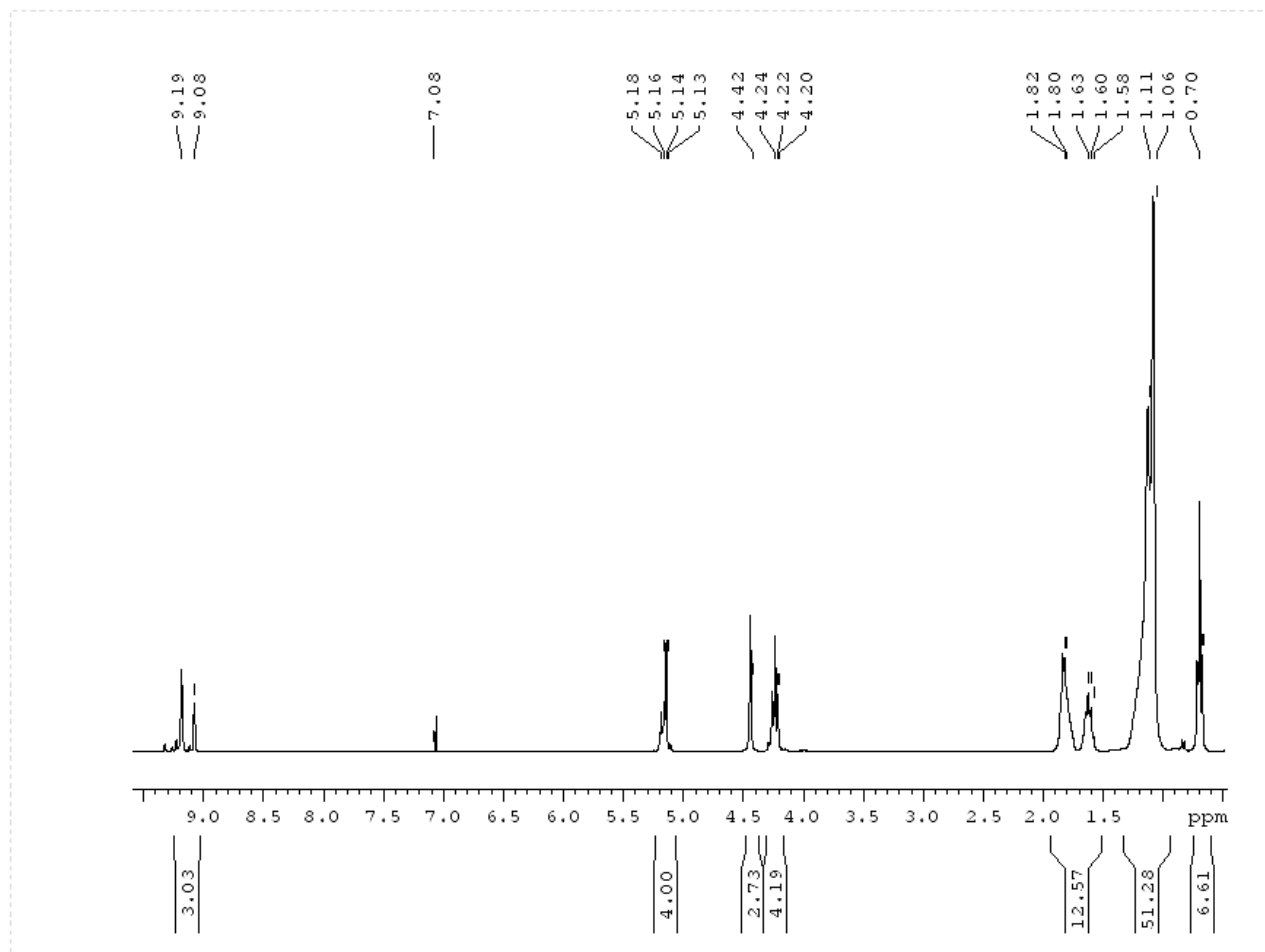

<sup>13</sup>CNMR for compound **diC18:1**

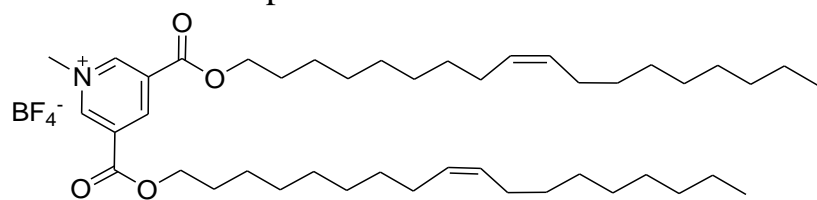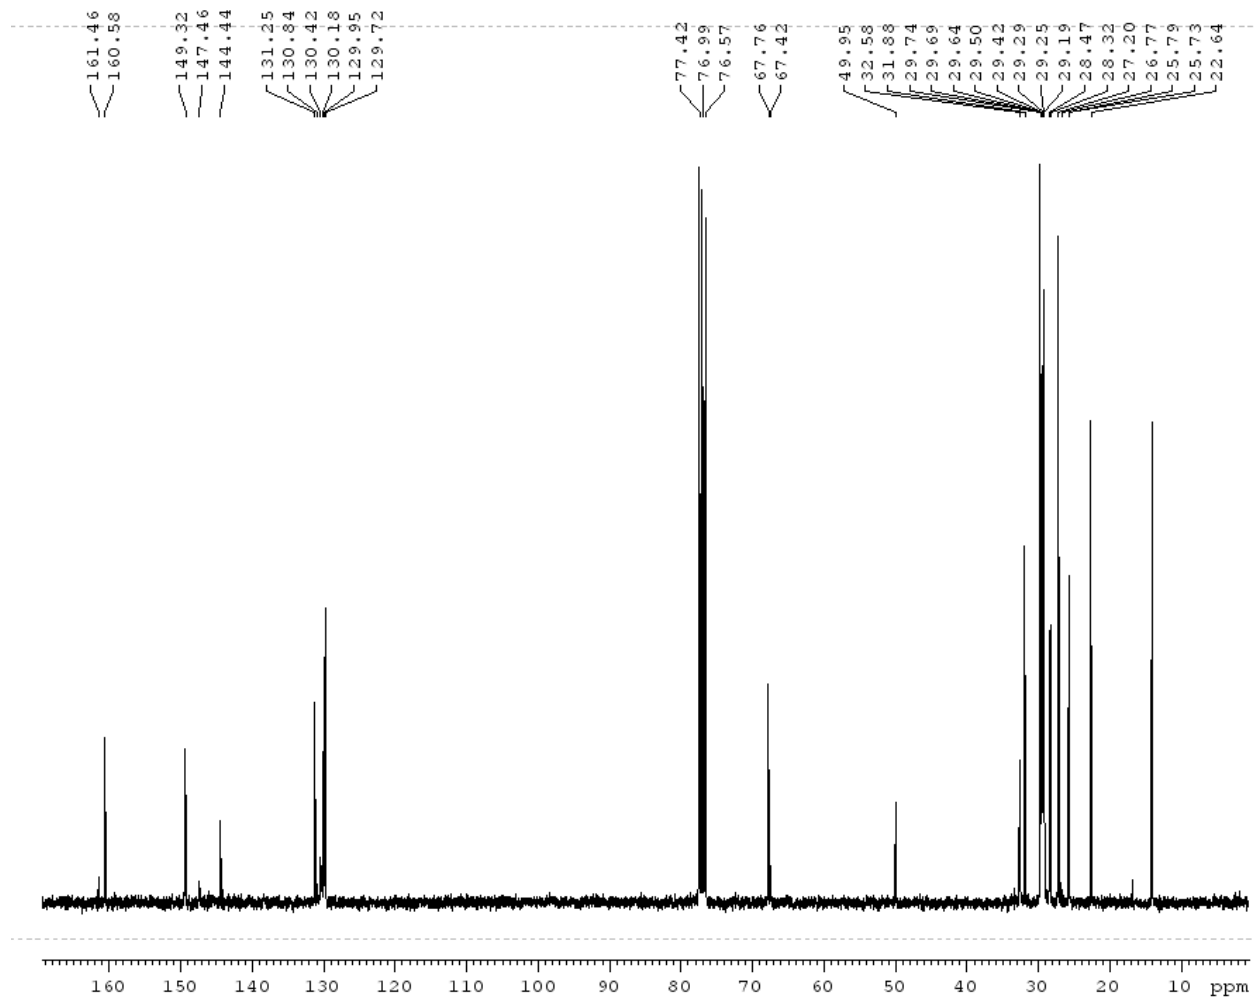

# <sup>1</sup>H NMR for compound diC11:1 pyridine

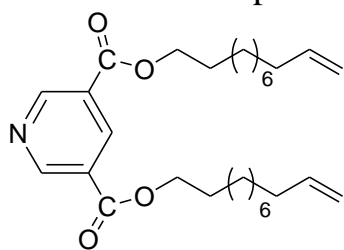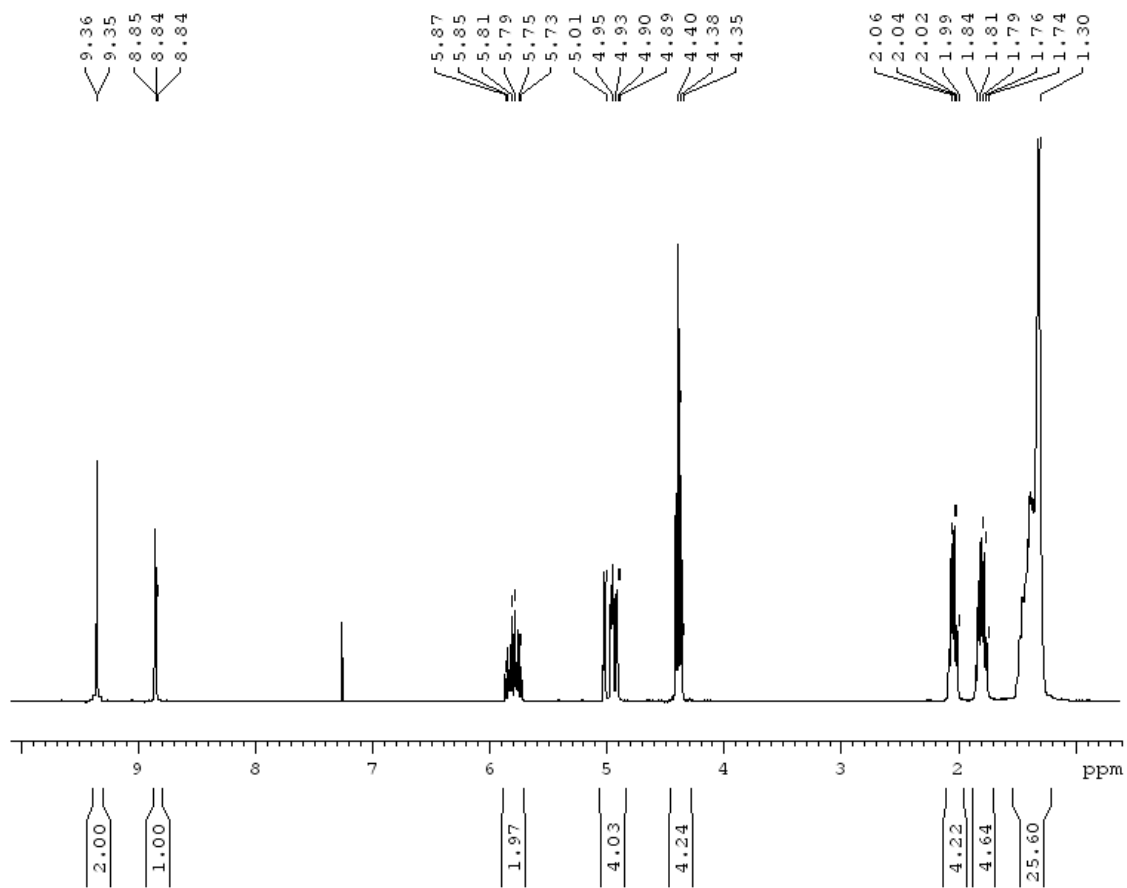

<sup>13</sup>CNMR for compound **diC11:1 pyridine**

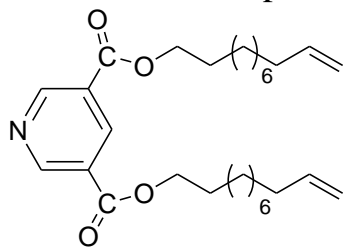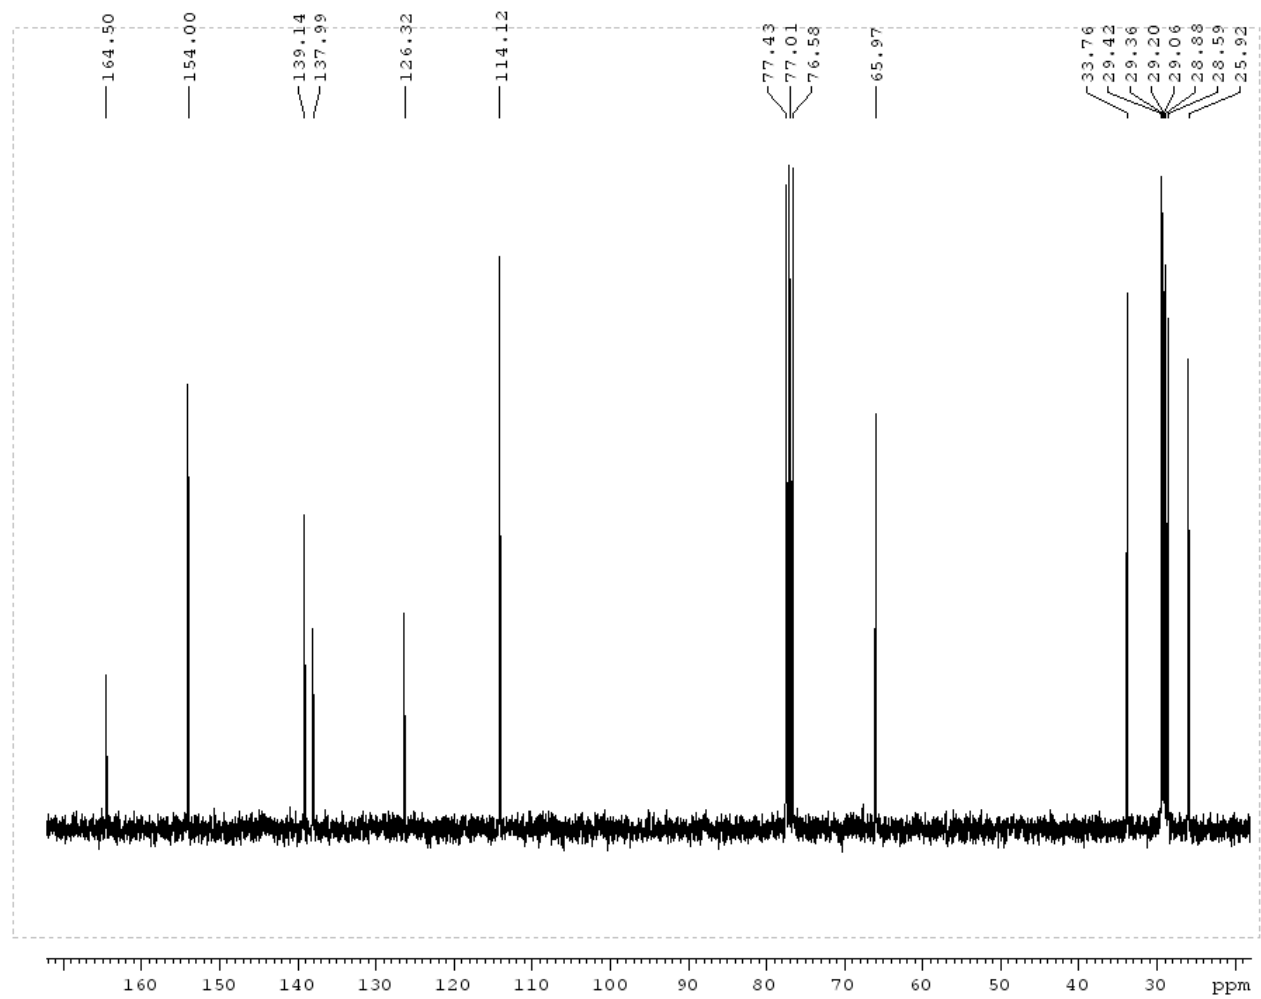



# <sup>1</sup>H NMR for compound diC11:1

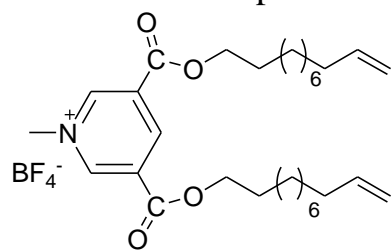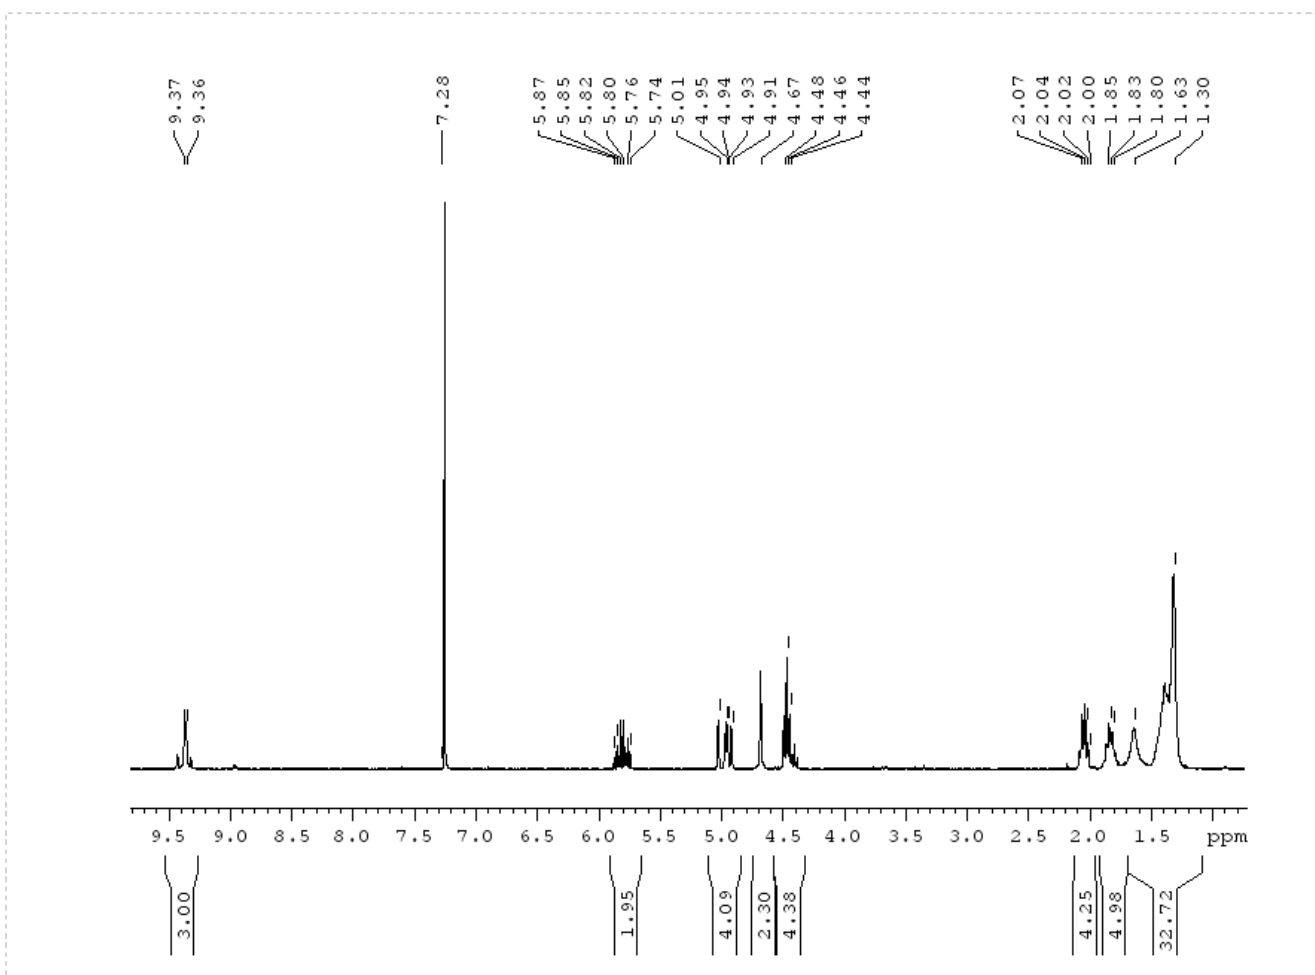

<sup>13</sup>CNMR for compound **diC11:1**

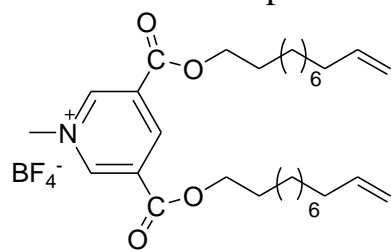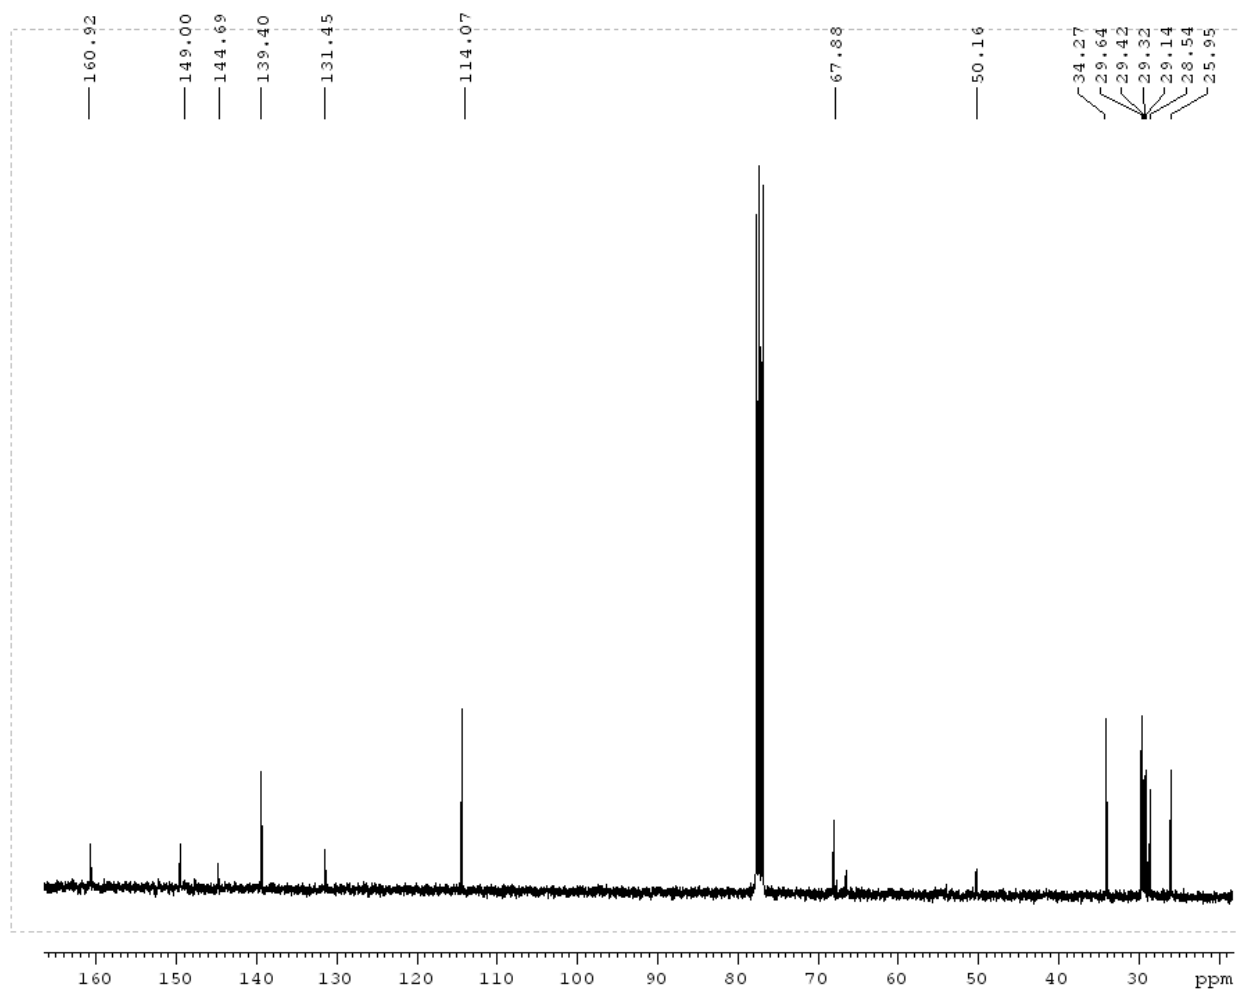

<sup>1</sup>H NMR for compound (C16:0)(C11:1) pyridine

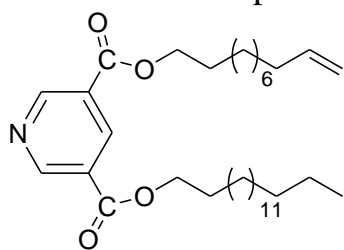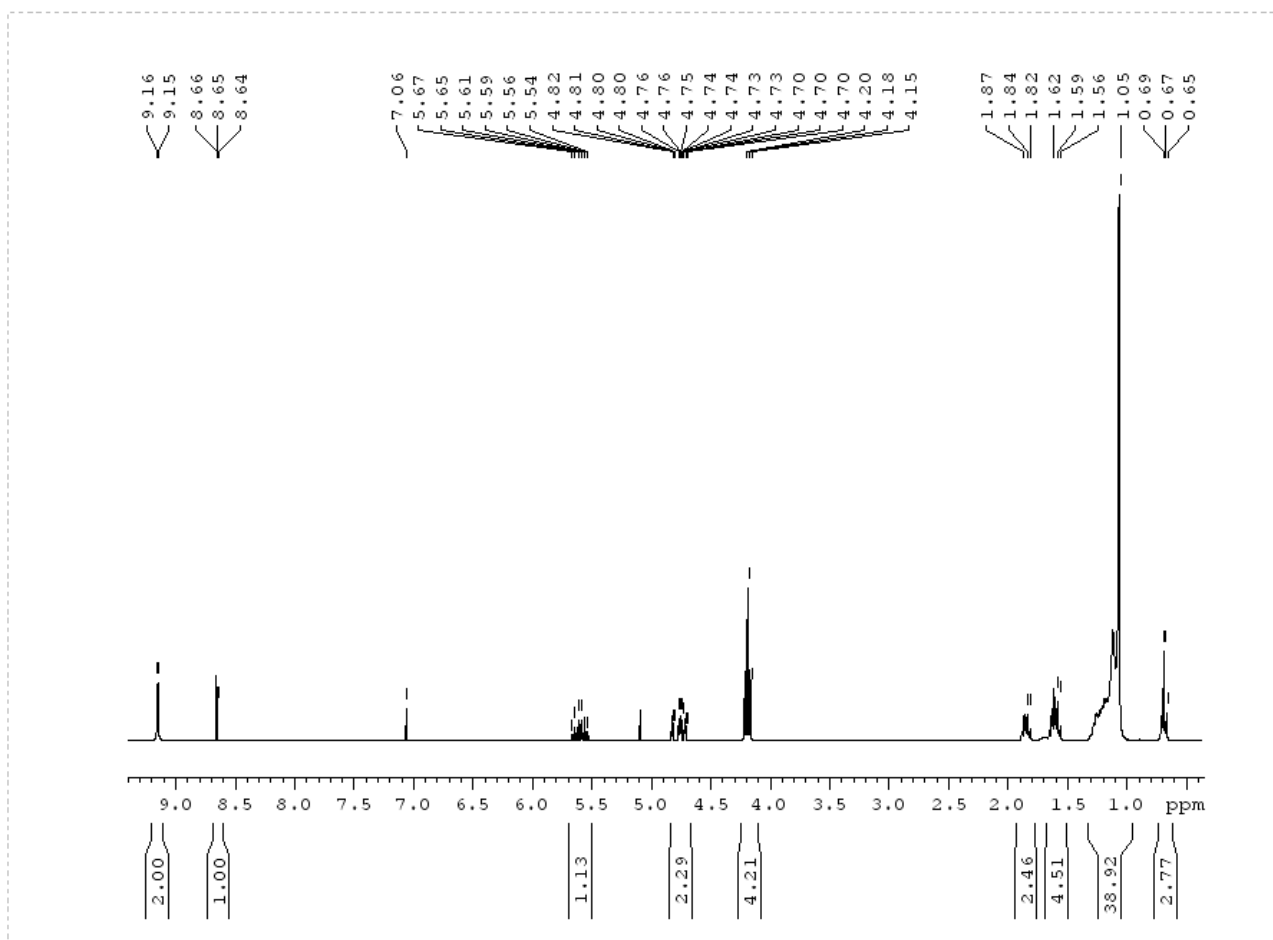

<sup>13</sup>CNMR for compound (C16:0)(C11:1) pyridine

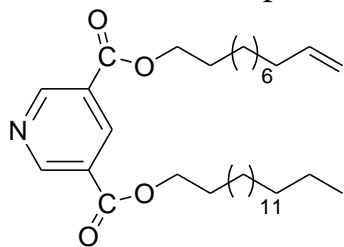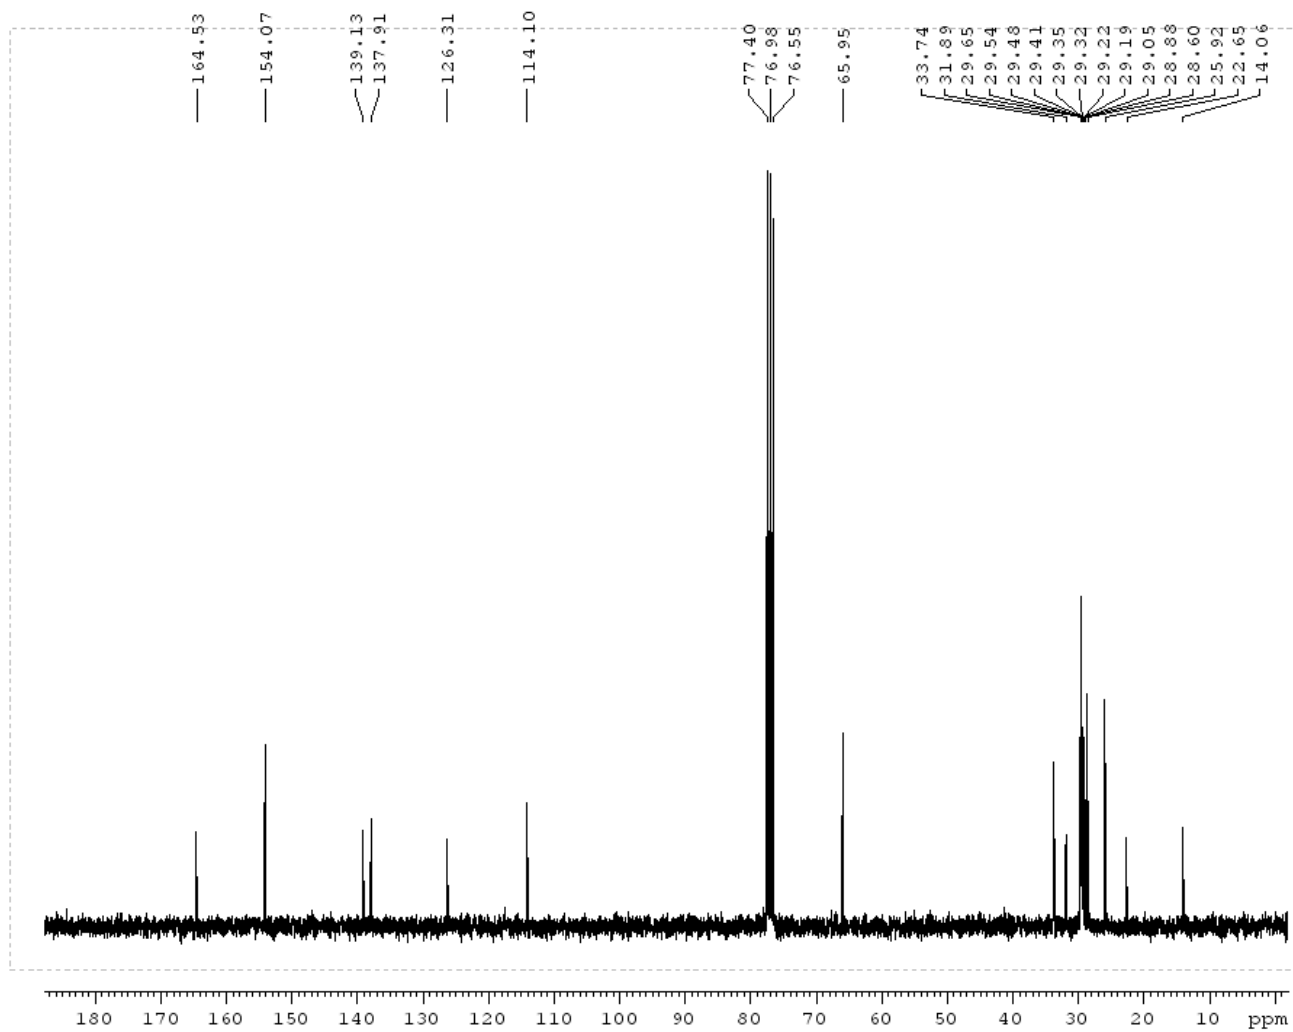

<sup>1</sup>HNMR for compound (C16:0)(C11:1)

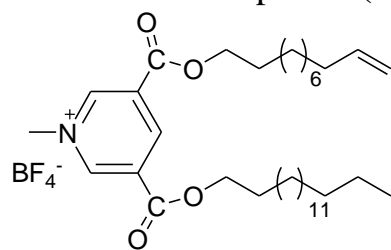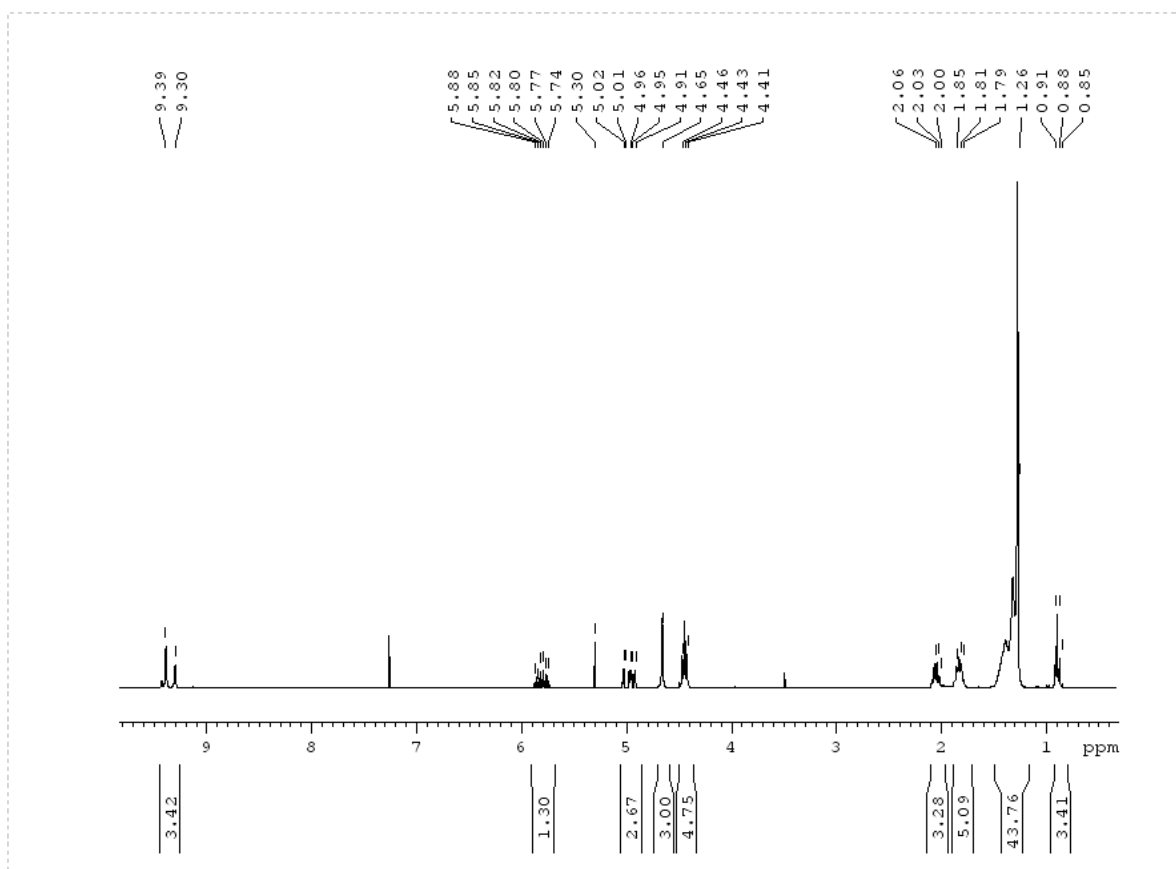

<sup>13</sup>CNMR for compound (C16:0)(C11:1)

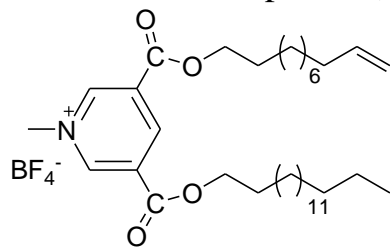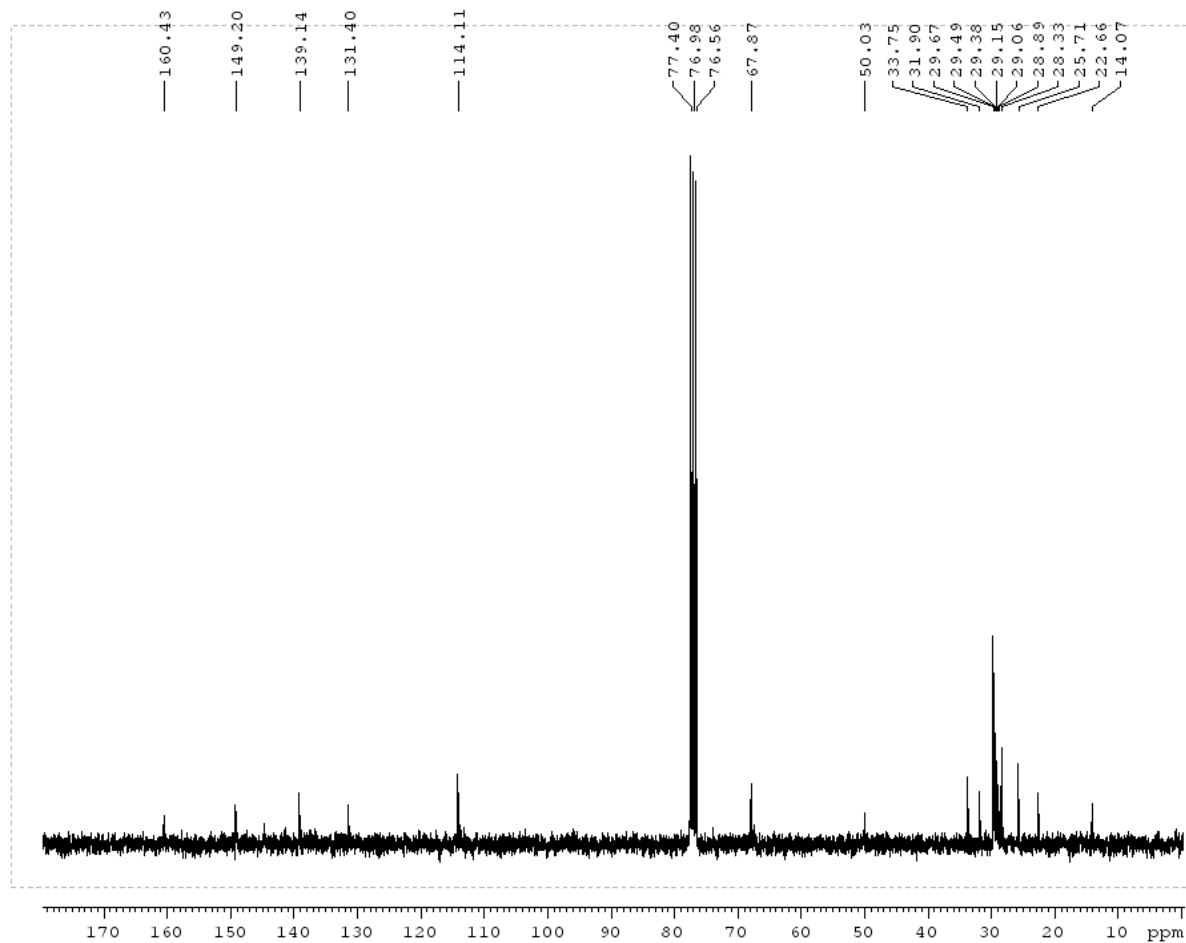

<sup>1</sup>H NMR for compound (C18:1)(brC20:0) pyridine

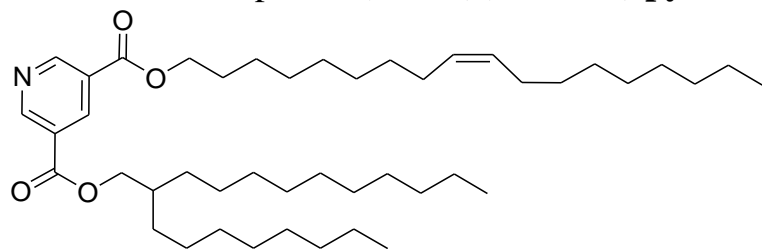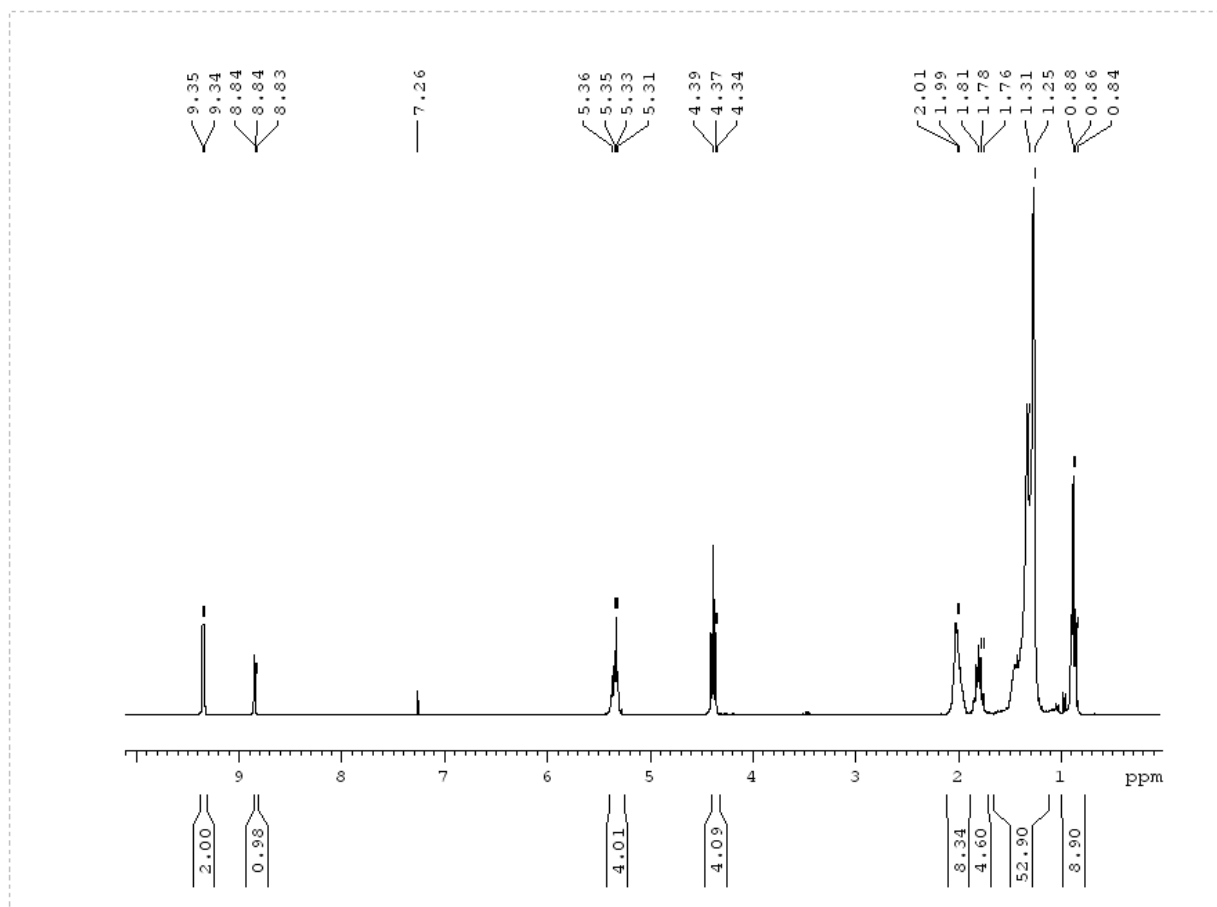

<sup>13</sup>CNMR for compound (C18:1)(brC20:0) pyridine

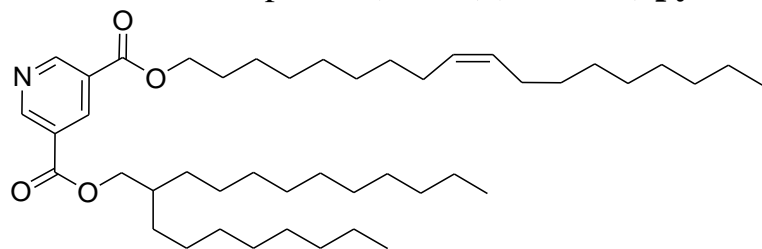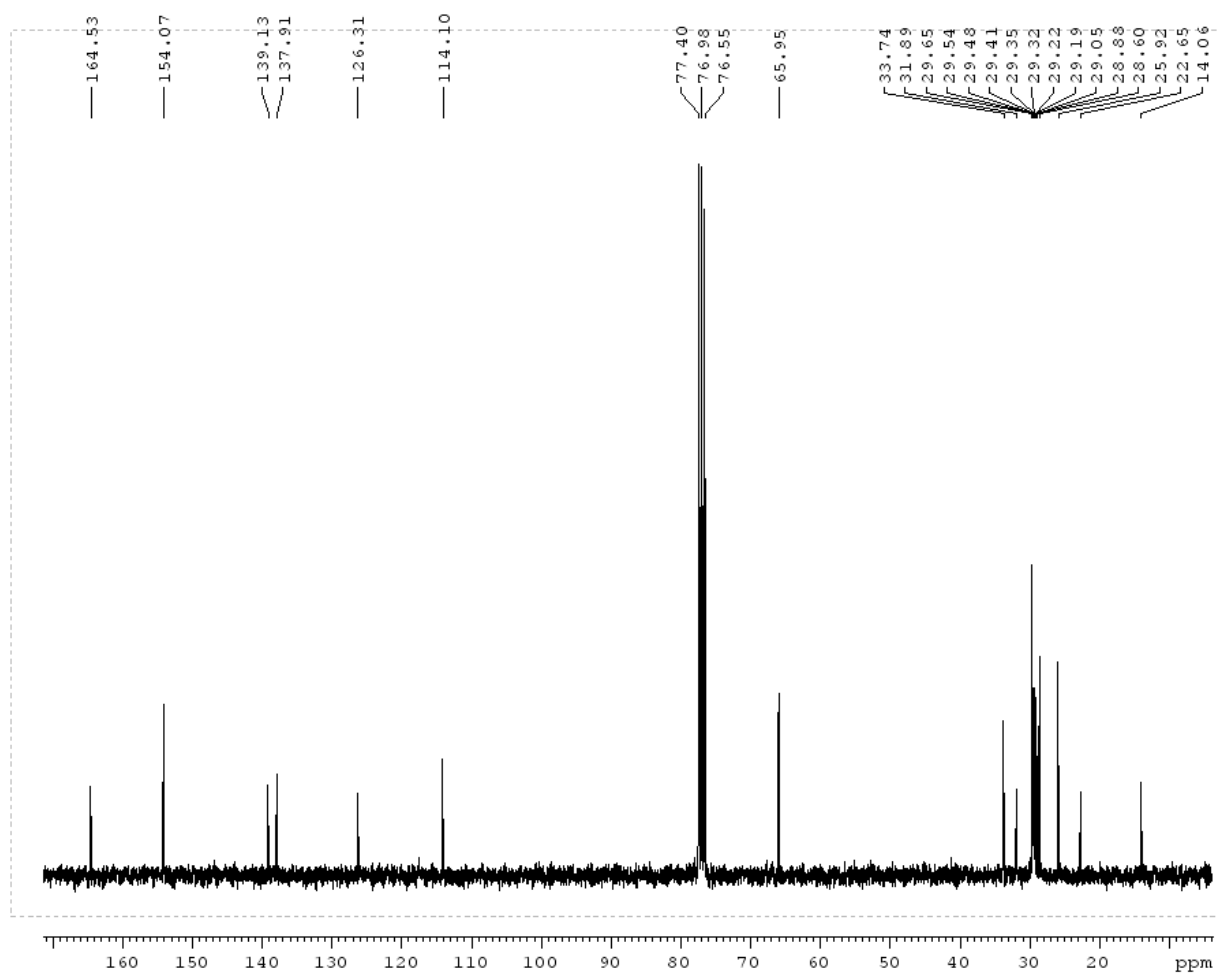



<sup>1</sup>H NMR for compound (C18:1)(brC20:0)

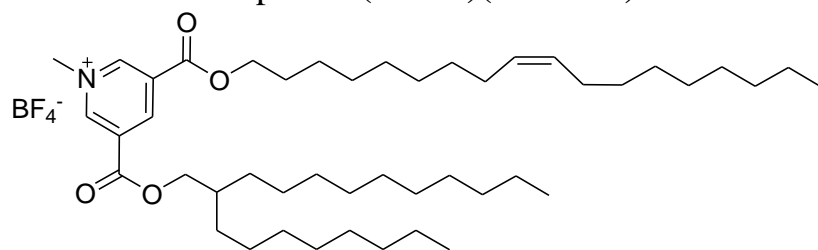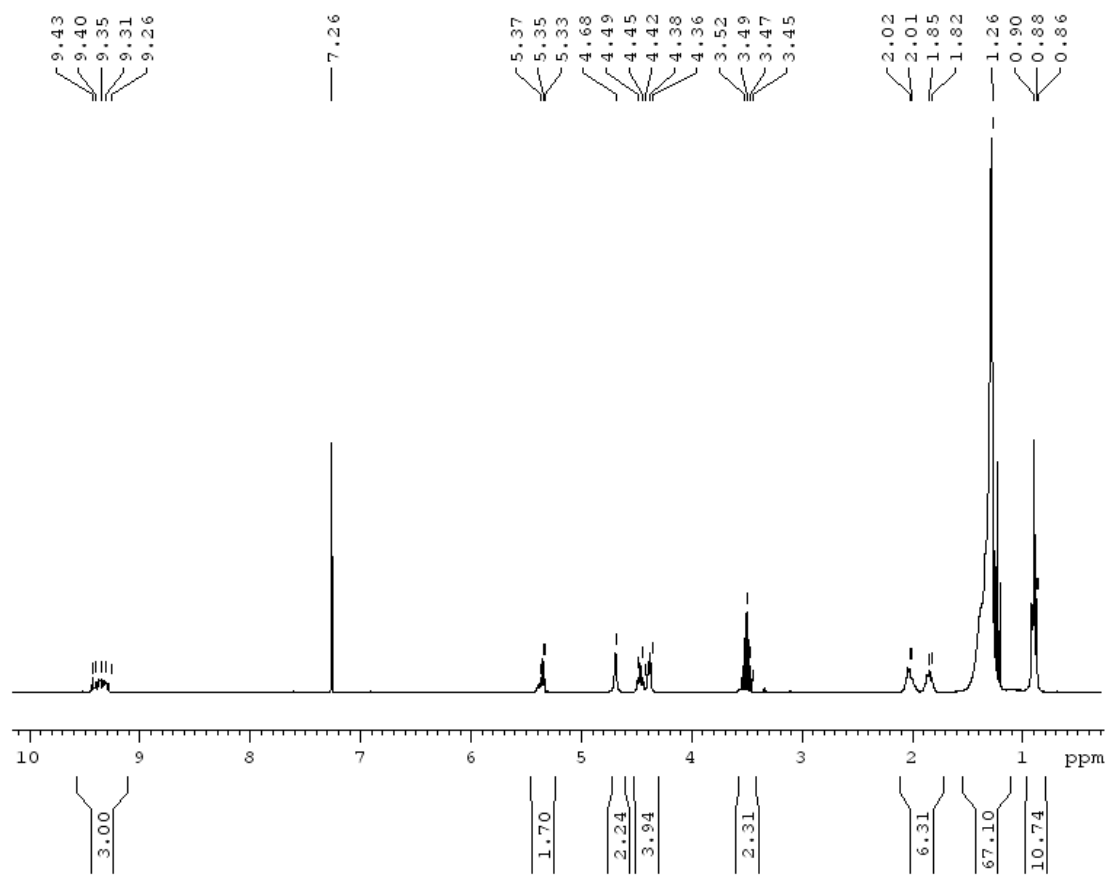

$^{13}\text{C}$ NMR for compound (C18:1)(brC20:0)

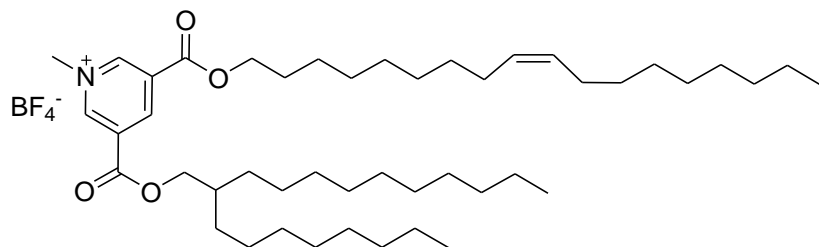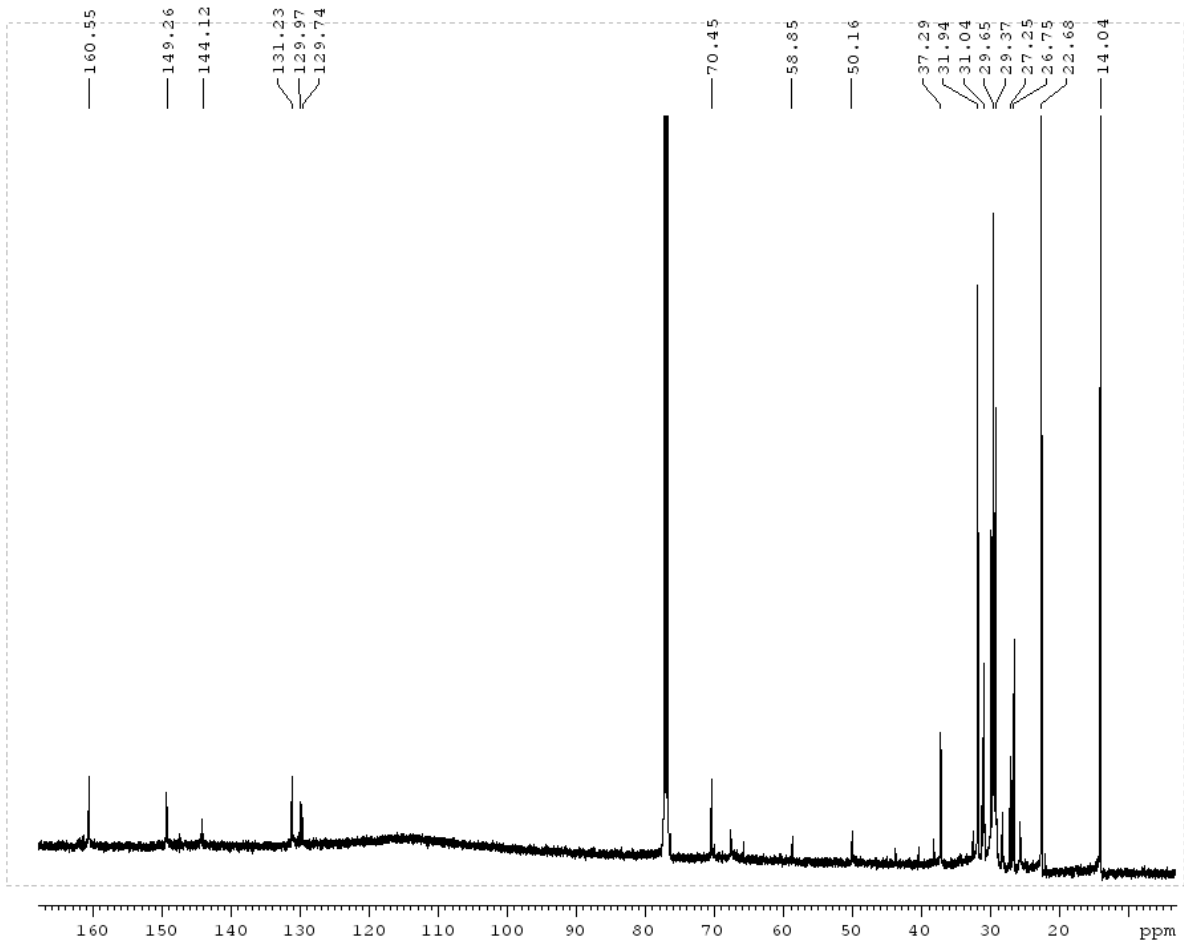

Supplement: c6ob00041j1.pdf [file c6ob00041j1.pdf]
